# Supplementary material for: FreeSurfer based cortical mapping and T1-relaxometry with MPnRAGE: Test-retest reliability with and without retrospective motion correction
Source: PubMed Central journal article supplement — Neuroimage. Author manuscript; Available in PMC 2021 Nov 15. (PMC8525331; doi:10.1016/j.neuroimage.2021.118447), 2021-08-03
Supplement: NIHMS1741393-supplement-1.pdf [file NIHMS1741393-supplement-1.pdf]

Supplementary Table 1: R1 measurements for regions of Destrieux atlas. Coefficients of variation (CoV) are given as % x 100. Statistically significant differences (at  $p < 0.05$  after FDR correction) of the parameter values and associated CoVs between non-motion corrected and motion corrected datasets are given with \*.

|                                   |               |                |
|-----------------------------------|---------------|----------------|
| G_and_S_frontomargin<br>R1 (1/s)  | 0.664 ± 0.043 | 0.618 ± 0.015* |
| CoV (vertex based)                | 5.091 ± 3.759 | 1.530 ± 0.618* |
| CoV (ROI based)                   | 4.657 ± 4.018 | 0.781 ± 0.468* |
| ICC (vertex based)                | 0.376 ± 0.062 | 0.659 ± 0.098  |
| ICC (ROI based)                   | 0.388         | 0.865          |
|                                   |               |                |
| G_and_S_occipital_inf<br>R1 (1/s) | 0.672 ± 0.034 | 0.646 ± 0.016* |
| CoV (vertex based)                | 3.339 ± 2.702 | 1.206 ± 0.453* |
| CoV (ROI based)                   | 2.946 ± 2.795 | 0.654 ± 0.411* |
| ICC (vertex based)                | 0.490 ± 0.091 | 0.777 ± 0.071  |
| ICC (ROI based)                   | 0.517         | 0.906          |
|                                   |               |                |
| G_and_S_paracentral<br>R1 (1/s)   | 0.681 ± 0.022 | 0.663 ± 0.020* |
| CoV (vertex based)                | 3.326 ± 2.999 | 1.333 ± 0.479* |
| CoV (ROI based)                   | 2.711 ± 2.851 | 0.746 ± 0.477* |
| ICC (vertex based)                | 0.271 ± 0.166 | 0.791 ± 0.106  |
| ICC (ROI based)                   | 0.236         | 0.911          |
|                                   |               |                |
| G_and_S_subcentral<br>R1 (1/s)    | 0.664 ± 0.031 | 0.635 ± 0.016* |
| CoV (vertex based)                | 4.612 ± 3.791 | 1.513 ± 0.498* |

|                                      |               |                |
|--------------------------------------|---------------|----------------|
| CoV (ROI based)                      | 4.090 ± 3.692 | 0.796 ± 0.239* |
| ICC (vertex based)                   | 0.241 ± 0.127 | 0.733 ± 0.082  |
| ICC (ROI based)                      | 0.229         | 0.893          |
|                                      |               |                |
| G_and_S_transv_frontopol<br>R1 (1/s) | 0.650 ± 0.033 | 0.613 ± 0.012* |
| CoV (vertex based)                   | 4.384 ± 3.294 | 1.452 ± 0.578* |
| CoV (ROI based)                      | 4.054 ± 3.490 | 0.740 ± 0.578* |
| ICC (vertex based)                   | 0.337 ± 0.067 | 0.653 ± 0.099  |
| ICC (ROI based)                      | 0.312         | 0.776          |
|                                      |               |                |
| G_and_S_cingul-Ant<br>R1 (1/s)       | 0.657 ± 0.062 | 0.596 ± 0.013* |
| CoV (vertex based)                   | 7.052 ± 5.995 | 1.785 ± 0.728* |
| CoV (ROI based)                      | 6.520 ± 6.335 | 0.683 ± 0.706* |
| ICC (vertex based)                   | 0.351 ± 0.089 | 0.581 ± 0.126  |
| ICC (ROI based)                      | 0.349         | 0.809          |
|                                      |               |                |
| G_and_S_cingul-Mid-Ant<br>R1 (1/s)   | 0.664 ± 0.053 | 0.611 ± 0.016* |
| CoV (vertex based)                   | 6.312 ± 5.276 | 1.842 ± 0.669* |
| CoV (ROI based)                      | 5.783 ± 5.456 | 0.830 ± 0.765* |
| ICC (vertex based)                   | 0.312 ± 0.087 | 0.634 ± 0.121  |
| ICC (ROI based)                      | 0.333         | 0.832          |
|                                      |               |                |
| G_and_S_cingul-Mid-Post<br>R1 (1/s)  | 0.668 ± 0.048 | 0.622 ± 0.017* |

|                                   |               |                |
|-----------------------------------|---------------|----------------|
| CoV (vertex based)                | 5.890 ± 4.957 | 1.873 ± 0.600* |
| CoV (ROI based)                   | 5.480 ± 5.099 | 0.905 ± 0.659* |
| ICC (vertex based)                | 0.279 ± 0.063 | 0.634 ± 0.140  |
| ICC (ROI based)                   | 0.295         | 0.841          |
|                                   |               |                |
| G_cingul-Post-dorsal<br>R1 (1/s)  | 0.656 ± 0.035 | 0.629 ± 0.014* |
| CoV (vertex based)                | 4.130 ± 4.074 | 1.706 ± 0.453* |
| CoV (ROI based)                   | 3.532 ± 4.286 | 0.815 ± 0.337* |
| ICC (vertex based)                | 0.287 ± 0.070 | 0.630 ± 0.067  |
| ICC (ROI based)                   | 0.299         | 0.856          |
|                                   |               |                |
| G_cingul-Post-ventral<br>R1 (1/s) | 0.670 ± 0.032 | 0.645 ± 0.016* |
| CoV (vertex based)                | 4.824 ± 3.669 | 2.403 ± 0.797* |
| CoV (ROI based)                   | 4.216 ± 3.791 | 1.262 ± 0.597* |
| ICC (vertex based)                | 0.213 ± 0.120 | 0.568 ± 0.125  |
| ICC (ROI based)                   | 0.209         | 0.735          |
|                                   |               |                |
| G_cuneus<br>R1 (1/s)              | 0.671 ± 0.029 | 0.651 ± 0.019* |
| CoV (vertex based)                | 3.010 ± 2.638 | 1.131 ± 0.353* |
| CoV (ROI based)                   | 2.538 ± 2.660 | 0.638 ± 0.431* |
| ICC (vertex based)                | 0.424 ± 0.062 | 0.837 ± 0.048  |
| ICC (ROI based)                   | 0.473         | 0.931          |
|                                   |               |                |
| G_front_inf-Opercular             |               |                |

|                      |               |                |
|----------------------|---------------|----------------|
| R1 (1/s)             | 0.649 ± 0.030 | 0.619 ± 0.016* |
| CoV (vertex based)   | 4.654 ± 3.913 | 1.489 ± 0.468* |
| CoV (ROI based)      | 4.131 ± 4.157 | 0.741 ± 0.409* |
| ICC (vertex based)   | 0.229 ± 0.104 | 0.726 ± 0.077  |
| ICC (ROI based)      | 0.176         | 0.893          |
| G_front_inf-Orbital  |               |                |
| R1 (1/s)             | 0.654 ± 0.039 | 0.616 ± 0.016* |
| CoV (vertex based)   | 5.706 ± 4.662 | 1.611 ± 0.967* |
| CoV (ROI based)      | 5.413 ± 4.613 | 0.951 ± 0.960* |
| ICC (vertex based)   | 0.213 ± 0.054 | 0.626 ± 0.103  |
| ICC (ROI based)      | 0.224         | 0.778          |
| G_front_inf-Triangul |               |                |
| R1 (1/s)             | 0.645 ± 0.026 | 0.620 ± 0.018* |
| CoV (vertex based)   | 4.031 ± 3.597 | 1.378 ± 0.570* |
| CoV (ROI based)      | 3.508 ± 3.701 | 0.713 ± 0.568* |
| ICC (vertex based)   | 0.232 ± 0.096 | 0.795 ± 0.071  |
| ICC (ROI based)      | 0.192         | 0.903          |
| G_front_middle       |               |                |
| R1 (1/s)             | 0.653 ± 0.037 | 0.621 ± 0.014* |
| CoV (vertex based)   | 4.547 ± 3.699 | 1.392 ± 0.681* |
| CoV (ROI based)      | 3.994 ± 3.740 | 0.773 ± 0.580* |
| ICC (vertex based)   | 0.333 ± 0.122 | 0.690 ± 0.105  |
| ICC (ROI based)      | 0.374         | 0.826          |

|                         |               |                |
|-------------------------|---------------|----------------|
| G_front_sup             |               |                |
| R1 (1/s)                | 0.653 ± 0.027 | 0.624 ± 0.016* |
| CoV (vertex based)      | 4.068 ± 3.448 | 1.650 ± 0.928* |
| CoV (ROI based)         | 3.426 ± 3.480 | 1.032 ± 0.818* |
| ICC (vertex based)      | 0.248 ± 0.128 | 0.665 ± 0.134  |
| ICC (ROI based)         | 0.248         | 0.779          |
| G_Ins_lg_and_S_cent_ins |               |                |
| R1 (1/s)                | 0.639 ± 0.033 | 0.614 ± 0.018* |
| CoV (vertex based)      | 4.512 ± 3.455 | 2.274 ± 0.385* |
| CoV (ROI based)         | 3.506 ± 3.907 | 1.157 ± 0.505  |
| ICC (vertex based)      | 0.329 ± 0.116 | 0.569 ± 0.149  |
| ICC (ROI based)         | 0.345         | 0.823          |
| G_insular_short         |               |                |
| R1 (1/s)                | 0.639 ± 0.036 | 0.608 ± 0.016* |
| CoV (vertex based)      | 4.985 ± 4.002 | 2.164 ± 0.781* |
| CoV (ROI based)         | 4.100 ± 4.324 | 1.094 ± 0.628  |
| ICC (vertex based)      | 0.278 ± 0.092 | 0.542 ± 0.101  |
| ICC (ROI based)         | 0.316         | 0.776          |
| G_occipital_middle      |               |                |
| R1 (1/s)                | 0.666 ± 0.033 | 0.644 ± 0.017* |
| CoV (vertex based)      | 3.076 ± 2.738 | 0.967 ± 0.334* |
| CoV (ROI based)         | 2.691 ± 2.657 | 0.416 ± 0.308* |
| ICC (vertex based)      | 0.478 ± 0.136 | 0.862 ± 0.044  |
| ICC (ROI based)         | 0.530         | 0.960          |

|                       |                |               |                |
|-----------------------|----------------|---------------|----------------|
| G_occipital_sup       |                |               |                |
| R1 (1/s)              | 0.670 ± 0.026  |               | 0.650 ± 0.016* |
| CoV (vertex based)    | 3.023 ± 2.447  |               | 1.047 ± 0.581* |
| CoV (ROI based)       | 2.711 ± 2.361  |               | 0.737 ± 0.616* |
| ICC (vertex based)    | 0.389 ± 0.105  |               | 0.815 ± 0.084  |
| ICC (ROI based)       | 0.420          |               | 0.856          |
|                       |                |               |                |
| G_oc-temp_lat-fusifor |                |               |                |
| R1 (1/s)              | 0.674 ± 0.039  |               | 0.643 ± 0.016* |
| CoV (vertex based)    | 4.303 ± 3.655  |               | 1.532 ± 0.346* |
| CoV (ROI based)       | 3.662 ± 3.741  |               | 0.587 ± 0.445* |
| ICC (vertex based)    | 0.358 ± 0.109  |               | 0.711 ± 0.141  |
| ICC (ROI based)       | 0.412          |               | 0.914          |
|                       |                |               |                |
| G_oc-temp_med-Lingual |                |               |                |
| R1 (1/s)              | 0.663 ± 0.040  |               | 0.636 ± 0.024* |
| CoV (vertex based)    | 4.058 ± 3.762  |               | 1.560 ± 0.248* |
| CoV (ROI based)       | 3.322 ± 3.851  |               | 0.742 ± 0.246* |
| ICC (vertex based)    | 0.424 ± 0.122  |               | 0.835 ± 0.065  |
| ICC (ROI based)       | 0.456          |               | 0.953          |
|                       |                |               |                |
| G_oc-temp_med-Parahip |                |               |                |
| R1 (1/s)              | 0.722 ± 0.083  |               | 0.678 ± 0.021* |
| CoV (vertex based)    | 7.654 ± 6.244  |               | 4.638 ± 0.592* |
| CoV (ROI based)       | 6.889 ± 12.835 | 2.461 ± 0.993 |                |
| ICC (vertex based)    | 0.162 ± 0.135  |               | 0.471 ± 0.154  |

|                       |               |                |
|-----------------------|---------------|----------------|
| ICC (ROI based)       | 0.014         | 0.492          |
| G_orbital             |               |                |
| R1 (1/s)              | 0.648 ± 0.030 | 0.613 ± 0.016* |
| CoV (vertex based)    | 5.033 ± 3.390 | 1.968 ± 0.772* |
| CoV (ROI based)       | 4.292 ± 3.470 | 0.870 ± 0.847* |
| ICC (vertex based)    | 0.215 ± 0.107 | 0.623 ± 0.113  |
| ICC (ROI based)       | 0.223         | 0.813          |
| G_pariet_inf-Angular  |               |                |
| R1 (1/s)              | 0.653 ± 0.034 | 0.627 ± 0.016* |
| CoV (vertex based)    | 3.809 ± 3.572 | 1.094 ± 0.417* |
| CoV (ROI based)       | 3.183 ± 3.477 | 0.651 ± 0.414* |
| ICC (vertex based)    | 0.377 ± 0.100 | 0.817 ± 0.056  |
| ICC (ROI based)       | 0.425         | 0.910          |
| G_pariet_inf-Supramar |               |                |
| R1 (1/s)              | 0.649 ± 0.026 | 0.627 ± 0.015* |
| CoV (vertex based)    | 3.750 ± 3.474 | 1.327 ± 0.491* |
| CoV (ROI based)       | 3.002 ± 3.260 | 0.797 ± 0.443* |
| ICC (vertex based)    | 0.257 ± 0.129 | 0.744 ± 0.089  |
| ICC (ROI based)       | 0.271         | 0.854          |
| G_parietal_sup        |               |                |
| R1 (1/s)              | 0.661 ± 0.034 | 0.631 ± 0.017* |
| CoV (vertex based)    | 4.215 ± 3.211 | 1.104 ± 0.358* |
| CoV (ROI based)       | 3.771 ± 3.267 | 0.657 ± 0.363* |

|                    |               |                |
|--------------------|---------------|----------------|
| ICC (vertex based) | 0.352 ± 0.135 | 0.844 ± 0.056  |
| ICC (ROI based)    | 0.384         | 0.920          |
| G_postcentral      |               |                |
| R1 (1/s)           | 0.683 ± 0.027 | 0.663 ± 0.021* |
| CoV (vertex based) | 3.918 ± 3.326 | 1.642 ± 0.512* |
| CoV (ROI based)    | 3.094 ± 3.359 | 1.002 ± 0.613* |
| ICC (vertex based) | 0.242 ± 0.130 | 0.747 ± 0.121  |
| ICC (ROI based)    | 0.253         | 0.866          |
| G_precentral       |               |                |
| R1 (1/s)           | 0.682 ± 0.026 | 0.663 ± 0.019* |
| CoV (vertex based) | 3.630 ± 3.469 | 1.465 ± 0.545* |
| CoV (ROI based)    | 2.929 ± 3.288 | 0.766 ± 0.500* |
| ICC (vertex based) | 0.246 ± 0.121 | 0.768 ± 0.107  |
| ICC (ROI based)    | 0.246         | 0.903          |
| G_precuneus        |               |                |
| R1 (1/s)           | 0.651 ± 0.031 | 0.624 ± 0.015* |
| CoV (vertex based) | 4.226 ± 3.479 | 1.205 ± 0.364* |
| CoV (ROI based)    | 3.764 ± 3.514 | 0.652 ± 0.393* |
| ICC (vertex based) | 0.281 ± 0.126 | 0.782 ± 0.104  |
| ICC (ROI based)    | 0.305         | 0.907          |
| G_rectus           |               |                |
| R1 (1/s)           | 0.639 ± 0.037 | 0.599 ± 0.019* |
| CoV (vertex based) | 6.245 ± 5.076 | 2.860 ± 0.953* |



|                       |                 |                |
|-----------------------|-----------------|----------------|
| CoV (ROI based)       | 5.003 ± 4.421   | 1.965 ± 1.028  |
| ICC (vertex based)    | 0.154 ± 0.110   | 0.527 ± 0.141  |
| ICC (ROI based)       | 0.223           | 0.617          |
| G_subcallosal         |                 |                |
| R1 (1/s)              | 0.693 ± 0.138   | 0.619 ± 0.031* |
| CoV (vertex based)    | 13.306 ± 14.706 | 5.872 ± 3.036* |
| CoV (ROI based)       | 11.485 ± 16.607 | 5.007 ± 3.723  |
| ICC (vertex based)    | 0.068 ± 0.077   | 0.282 ± 0.144  |
| ICC (ROI based)       | 0.084           | 0.189          |
| G_temp_sup-G_T_transv |                 |                |
| R1 (1/s)              | 0.683 ± 0.026   | 0.669 ± 0.029* |
| CoV (vertex based)    | 3.295 ± 2.958   | 1.452 ± 0.499* |
| CoV (ROI based)       | 2.587 ± 2.876   | 0.768 ± 0.537* |
| ICC (vertex based)    | 0.328 ± 0.131   | 0.877 ± 0.042  |
| ICC (ROI based)       | 0.368           | 0.954          |
| G_temp_sup-Lateral    |                 |                |
| R1 (1/s)              | 0.656 ± 0.025   | 0.639 ± 0.018* |
| CoV (vertex based)    | 3.417 ± 2.769   | 1.388 ± 0.357* |
| CoV (ROI based)       | 2.594 ± 2.446   | 0.749 ± 0.280* |
| ICC (vertex based)    | 0.302 ± 0.208   | 0.777 ± 0.070  |
| ICC (ROI based)       | 0.420           | 0.920          |
| G_temp_sup-Plan_polar |                 |                |
| R1 (1/s)              | 0.644 ± 0.033   | 0.624 ± 0.017  |
| CoV (vertex based)    | 4.998 ± 3.080   | 2.624 ± 0.736* |

|                                   |               |                |
|-----------------------------------|---------------|----------------|
| CoV (ROI based)                   | 3.553 ± 3.723 | 1.687 ± 0.903  |
| ICC (vertex based)                | 0.283 ± 0.111 | 0.543 ± 0.197  |
| ICC (ROI based)                   | 0.359         | 0.629          |
|                                   |               |                |
| G_temp_sup-Plan_tempo<br>R1 (1/s) | 0.656 ± 0.026 | 0.638 ± 0.018* |
| CoV (vertex based)                | 3.563 ± 3.410 | 1.363 ± 0.535* |
| CoV (ROI based)                   | 2.753 ± 3.045 | 0.950 ± 0.493* |
| ICC (vertex based)                | 0.311 ± 0.166 | 0.776 ± 0.073  |
| ICC (ROI based)                   | 0.341         | 0.860          |
|                                   |               |                |
| G_temporal_inf<br>R1 (1/s)        | 0.667 ± 0.036 | 0.631 ± 0.010* |
| CoV (vertex based)                | 4.539 ± 3.346 | 1.564 ± 0.601* |
| CoV (ROI based)                   | 3.994 ± 3.485 | 0.673 ± 0.654* |
| ICC (vertex based)                | 0.330 ± 0.094 | 0.592 ± 0.137  |
| ICC (ROI based)                   | 0.365         | 0.722          |
|                                   |               |                |
| G_temporal_middle<br>R1 (1/s)     | 0.657 ± 0.029 | 0.632 ± 0.012* |
| CoV (vertex based)                | 3.660 ± 2.713 | 1.418 ± 0.482* |
| CoV (ROI based)                   | 2.932 ± 2.673 | 0.619 ± 0.317* |
| ICC (vertex based)                | 0.367 ± 0.110 | 0.642 ± 0.110  |
| ICC (ROI based)                   | 0.445         | 0.874          |
|                                   |               |                |
| Lat_Fis-ant-Horizont<br>R1 (1/s)  | 0.663 ± 0.052 | 0.617 ± 0.024* |

|                      |               |                |
|----------------------|---------------|----------------|
| CoV (vertex based)   | 5.784 ± 4.753 | 1.742 ± 0.734* |
| CoV (ROI based)      | 5.364 ± 4.576 | 1.010 ± 0.717* |
| ICC (vertex based)   | 0.381 ± 0.084 | 0.775 ± 0.081  |
| ICC (ROI based)      | 0.423         | 0.905          |
| Lat_Fis-ant-Vertical |               |                |
| R1 (1/s)             | 0.660 ± 0.043 | 0.615 ± 0.021* |
| CoV (vertex based)   | 5.638 ± 4.335 | 1.551 ± 0.595* |
| CoV (ROI based)      | 5.314 ± 4.440 | 0.914 ± 0.570* |
| ICC (vertex based)   | 0.300 ± 0.064 | 0.794 ± 0.061  |
| ICC (ROI based)      | 0.311         | 0.905          |
| Lat_Fis-post         |               |                |
| R1 (1/s)             | 0.683 ± 0.044 | 0.641 ± 0.020* |
| CoV (vertex based)   | 5.415 ± 4.756 | 1.685 ± 0.481* |
| CoV (ROI based)      | 4.765 ± 4.999 | 0.708 ± 0.487* |
| ICC (vertex based)   | 0.288 ± 0.080 | 0.740 ± 0.072  |
| ICC (ROI based)      | 0.296         | 0.922          |
| Pole_occipital       |               |                |
| R1 (1/s)             | 0.672 ± 0.029 | 0.652 ± 0.020* |
| CoV (vertex based)   | 2.897 ± 2.185 | 1.336 ± 0.624* |
| CoV (ROI based)      | 2.319 ± 2.274 | 0.725 ± 0.633* |
| ICC (vertex based)   | 0.515 ± 0.074 | 0.800 ± 0.085  |
| ICC (ROI based)      | 0.568         | 0.903          |
| Pole_temporal        |               |                |

|                     |               |                |
|---------------------|---------------|----------------|
| R1 (1/s)            | 0.654 ± 0.025 | 0.627 ± 0.013* |
| CoV (vertex based)  | 4.499 ± 3.115 | 1.937 ± 0.724* |
| CoV (ROI based)     | 3.438 ± 3.046 | 0.940 ± 0.541* |
| ICC (vertex based)  | 0.190 ± 0.177 | 0.629 ± 0.112  |
| ICC (ROI based)     | 0.219         | 0.766          |
| S_calcarine         |               |                |
| R1 (1/s)            | 0.683 ± 0.036 | 0.652 ± 0.021* |
| CoV (vertex based)  | 4.364 ± 3.684 | 1.718 ± 0.366* |
| CoV (ROI based)     | 3.579 ± 3.996 | 0.678 ± 0.499* |
| ICC (vertex based)  | 0.337 ± 0.133 | 0.738 ± 0.174  |
| ICC (ROI based)     | 0.341         | 0.932          |
| S_central           |               |                |
| R1 (1/s)            | 0.713 ± 0.033 | 0.686 ± 0.022* |
| CoV (vertex based)  | 4.019 ± 3.492 | 1.560 ± 0.416* |
| CoV (ROI based)     | 3.368 ± 3.456 | 0.842 ± 0.417* |
| ICC (vertex based)  | 0.292 ± 0.132 | 0.765 ± 0.104  |
| ICC (ROI based)     | 0.333         | 0.913          |
| S_cingul-Marginalis |               |                |
| R1 (1/s)            | 0.675 ± 0.052 | 0.632 ± 0.017* |
| CoV (vertex based)  | 5.430 ± 5.075 | 1.520 ± 0.612* |
| CoV (ROI based)     | 4.867 ± 5.219 | 0.747 ± 0.634* |
| ICC (vertex based)  | 0.357 ± 0.070 | 0.718 ± 0.114  |
| ICC (ROI based)     | 0.388         | 0.878          |

|                       |               |                |
|-----------------------|---------------|----------------|
| S_circular_insula_ant |               |                |
| R1 (1/s)              | 0.636 ± 0.030 | 0.607 ± 0.013* |
| CoV (vertex based)    | 5.198 ± 4.158 | 2.154 ± 0.778* |
| CoV (ROI based)       | 4.433 ± 4.532 | 1.101 ± 0.782* |
| ICC (vertex based)    | 0.156 ± 0.095 | 0.491 ± 0.122  |
| ICC (ROI based)       | 0.124         | 0.683          |
| <br>                  |               |                |
| S_circular_insula_inf |               |                |
| R1 (1/s)              | 0.642 ± 0.036 | 0.614 ± 0.017* |
| CoV (vertex based)    | 4.731 ± 3.372 | 2.254 ± 0.457* |
| CoV (ROI based)       | 3.742 ± 3.781 | 0.939 ± 0.332* |
| ICC (vertex based)    | 0.365 ± 0.099 | 0.593 ± 0.147  |
| ICC (ROI based)       | 0.387         | 0.869          |
| <br>                  |               |                |
| S_circular_insula_sup |               |                |
| R1 (1/s)              | 0.665 ± 0.059 | 0.609 ± 0.017* |
| CoV (vertex based)    | 6.541 ± 5.241 | 2.063 ± 0.455* |
| CoV (ROI based)       | 6.071 ± 5.486 | 0.995 ± 0.404* |
| ICC (vertex based)    | 0.374 ± 0.085 | 0.629 ± 0.107  |
| ICC (ROI based)       | 0.388         | 0.859          |
| <br>                  |               |                |
| S_collat_transv_ant   |               |                |
| R1 (1/s)              | 0.667 ± 0.038 | 0.630 ± 0.014* |
| CoV (vertex based)    | 5.157 ± 3.860 | 2.160 ± 0.872* |
| CoV (ROI based)       | 4.497 ± 4.077 | 1.176 ± 0.778* |
| ICC (vertex based)    | 0.269 ± 0.106 | 0.459 ± 0.172  |
| ICC (ROI based)       | 0.304         | 0.670          |

|                      |               |                |
|----------------------|---------------|----------------|
| S_collat_transv_post |               |                |
| R1 (1/s)             | 0.676 ± 0.042 | 0.641 ± 0.024* |
| CoV (vertex based)   | 4.439 ± 3.927 | 1.226 ± 0.383* |
| CoV (ROI based)      | 4.244 ± 4.002 | 0.788 ± 0.421* |
| ICC (vertex based)   | 0.413 ± 0.033 | 0.884 ± 0.025  |
| ICC (ROI based)      | 0.391         | 0.942          |
|                      |               |                |
| S_front_inf          |               |                |
| R1 (1/s)             | 0.671 ± 0.046 | 0.629 ± 0.017* |
| CoV (vertex based)   | 5.205 ± 4.013 | 1.616 ± 0.812* |
| CoV (ROI based)      | 4.800 ± 4.170 | 1.001 ± 0.836* |
| ICC (vertex based)   | 0.378 ± 0.104 | 0.681 ± 0.100  |
| ICC (ROI based)      | 0.403         | 0.782          |
|                      |               |                |
| S_front_middle       |               |                |
| R1 (1/s)             | 0.663 ± 0.046 | 0.620 ± 0.011* |
| CoV (vertex based)   | 5.384 ± 4.320 | 1.518 ± 0.810* |
| CoV (ROI based)      | 5.024 ± 4.434 | 1.001 ± 0.909* |
| ICC (vertex based)   | 0.357 ± 0.078 | 0.519 ± 0.127  |
| ICC (ROI based)      | 0.378         | 0.577          |
|                      |               |                |
| S_front_sup          |               |                |
| R1 (1/s)             | 0.671 ± 0.043 | 0.630 ± 0.012* |
| CoV (vertex based)   | 5.209 ± 4.311 | 1.632 ± 0.892* |
| CoV (ROI based)      | 4.723 ± 4.418 | 0.960 ± 0.949* |
| ICC (vertex based)   | 0.313 ± 0.080 | 0.596 ± 0.077  |

|                           |               |                |
|---------------------------|---------------|----------------|
| ICC (ROI based)           | 0.344         | 0.627          |
| S_interm_prim-Jensen      |               |                |
| R1 (1/s)                  | 0.651 ± 0.031 | 0.628 ± 0.014* |
| CoV (vertex based)        | 3.629 ± 3.489 | 1.195 ± 0.520* |
| CoV (ROI based)           | 3.232 ± 3.359 | 0.831 ± 0.565* |
| ICC (vertex based)        | 0.323 ± 0.090 | 0.770 ± 0.100  |
| ICC (ROI based)           | 0.347         | 0.815          |
| S_intrapariet_and_P_trans |               |                |
| R1 (1/s)                  | 0.679 ± 0.048 | 0.642 ± 0.019* |
| CoV (vertex based)        | 4.846 ± 4.764 | 1.299 ± 0.551* |
| CoV (ROI based)           | 4.373 ± 4.805 | 0.721 ± 0.541* |
| ICC (vertex based)        | 0.370 ± 0.078 | 0.788 ± 0.084  |
| ICC (ROI based)           | 0.395         | 0.908          |
| S_oc_middle_and_Lunatus   |               |                |
| R1 (1/s)                  | 0.677 ± 0.035 | 0.650 ± 0.018* |
| CoV (vertex based)        | 3.264 ± 2.475 | 1.074 ± 0.508* |
| CoV (ROI based)           | 2.947 ± 2.507 | 0.598 ± 0.492* |
| ICC (vertex based)        | 0.533 ± 0.087 | 0.838 ± 0.042  |
| ICC (ROI based)           | 0.569         | 0.927          |
| S_oc_sup_and_transversal  |               |                |
| R1 (1/s)                  | 0.677 ± 0.040 | 0.649 ± 0.017* |
| CoV (vertex based)        | 3.669 ± 3.458 | 1.099 ± 0.554* |
| CoV (ROI based)           | 3.421 ± 3.476 | 0.703 ± 0.579* |

|                           |               |                |
|---------------------------|---------------|----------------|
| ICC (vertex based)        | 0.454 ± 0.077 | 0.809 ± 0.073  |
| ICC (ROI based)           | 0.470         | 0.887          |
| S_occipital_ant           |               |                |
| R1 (1/s)                  | 0.686 ± 0.040 | 0.654 ± 0.017* |
| CoV (vertex based)        | 3.871 ± 3.676 | 1.096 ± 0.341* |
| CoV (ROI based)           | 3.565 ± 3.700 | 0.596 ± 0.390* |
| ICC (vertex based)        | 0.420 ± 0.087 | 0.807 ± 0.097  |
| ICC (ROI based)           | 0.444         | 0.924          |
| S_oc-temp_lat             |               |                |
| R1 (1/s)                  | 0.678 ± 0.037 | 0.643 ± 0.012* |
| CoV (vertex based)        | 4.837 ± 3.985 | 1.633 ± 0.461* |
| CoV (ROI based)           | 4.266 ± 4.161 | 0.988 ± 0.448* |
| ICC (vertex based)        | 0.247 ± 0.115 | 0.590 ± 0.100  |
| ICC (ROI based)           | 0.279         | 0.726          |
| S_oc-temp_med_and_Lingual |               |                |
| R1 (1/s)                  | 0.662 ± 0.042 | 0.626 ± 0.018* |
| CoV (vertex based)        | 4.942 ± 3.912 | 1.910 ± 0.465* |
| CoV (ROI based)           | 4.187 ± 4.271 | 0.831 ± 0.584* |
| ICC (vertex based)        | 0.346 ± 0.092 | 0.669 ± 0.174  |
| ICC (ROI based)           | 0.380         | 0.878          |
| S_orbital_lateral         |               |                |
| R1 (1/s)                  | 0.657 ± 0.038 | 0.619 ± 0.017* |
| CoV (vertex based)        | 4.854 ± 4.156 | 1.604 ± 0.881* |



|                      |               |                |
|----------------------|---------------|----------------|
| CoV (ROI based)      | 4.523 ± 4.177 | 1.141 ± 0.866* |
| ICC (vertex based)   | 0.300 ± 0.055 | 0.664 ± 0.060  |
| ICC (ROI based)      | 0.319         | 0.769          |
| S_orbital_med-olfact |               |                |
| R1 (1/s)             | 0.645 ± 0.054 | 0.591 ± 0.019* |
| CoV (vertex based)   | 7.832 ± 6.744 | 2.970 ± 1.214* |
| CoV (ROI based)      | 7.089 ± 6.483 | 1.869 ± 1.487* |
| ICC (vertex based)   | 0.159 ± 0.090 | 0.520 ± 0.156  |
| ICC (ROI based)      | 0.200         | 0.584          |
| S_orbital-H_Shaped   |               |                |
| R1 (1/s)             | 0.667 ± 0.047 | 0.618 ± 0.020* |
| CoV (vertex based)   | 6.350 ± 4.827 | 2.000 ± 1.297* |
| CoV (ROI based)      | 5.915 ± 4.972 | 1.141 ± 1.421* |
| ICC (vertex based)   | 0.261 ± 0.098 | 0.638 ± 0.098  |
| ICC (ROI based)      | 0.272         | 0.749          |
| S_parieto_occipital  |               |                |
| R1 (1/s)             | 0.671 ± 0.038 | 0.639 ± 0.017* |
| CoV (vertex based)   | 4.327 ± 3.947 | 1.234 ± 0.392* |
| CoV (ROI based)      | 3.836 ± 4.140 | 0.729 ± 0.437* |
| ICC (vertex based)   | 0.352 ± 0.089 | 0.795 ± 0.080  |
| ICC (ROI based)      | 0.348         | 0.904          |
| S_pericallosal       |               |                |
| R1 (1/s)             | 0.710 ± 0.091 | 0.631 ± 0.020* |

|                       |               |                |
|-----------------------|---------------|----------------|
| CoV (vertex based)    | 9.344 ± 7.586 | 2.971 ± 0.832* |
| CoV (ROI based)       | 8.543 ± 8.192 | 1.049 ± 0.684* |
| ICC (vertex based)    | 0.305 ± 0.148 | 0.591 ± 0.151  |
| ICC (ROI based)       | 0.349         | 0.855          |
| S_postcentral         |               |                |
| R1 (1/s)              | 0.680 ± 0.041 | 0.647 ± 0.019* |
| CoV (vertex based)    | 4.552 ± 4.025 | 1.424 ± 0.453* |
| CoV (ROI based)       | 3.981 ± 4.080 | 0.778 ± 0.426* |
| ICC (vertex based)    | 0.331 ± 0.100 | 0.771 ± 0.092  |
| ICC (ROI based)       | 0.388         | 0.911          |
| S_precentral-inf-part |               |                |
| R1 (1/s)              | 0.670 ± 0.044 | 0.631 ± 0.017* |
| CoV (vertex based)    | 5.234 ± 4.441 | 1.637 ± 0.781* |
| CoV (ROI based)       | 4.866 ± 4.578 | 0.978 ± 0.861* |
| ICC (vertex based)    | 0.317 ± 0.082 | 0.677 ± 0.122  |
| ICC (ROI based)       | 0.328         | 0.793          |
| S_precentral-sup-part |               |                |
| R1 (1/s)              | 0.683 ± 0.036 | 0.648 ± 0.017* |
| CoV (vertex based)    | 4.766 ± 3.997 | 1.545 ± 0.735* |
| CoV (ROI based)       | 4.281 ± 4.038 | 0.885 ± 0.767* |
| ICC (vertex based)    | 0.278 ± 0.110 | 0.712 ± 0.070  |
| ICC (ROI based)       | 0.286         | 0.818          |
| S_suborbital          |               |                |

|                    |               |                |
|--------------------|---------------|----------------|
| R1 (1/s)           | 0.642 ± 0.042 | 0.596 ± 0.015* |
| CoV (vertex based) | 6.341 ± 5.215 | 2.288 ± 0.905* |
| CoV (ROI based)    | 5.253 ± 5.243 | 1.223 ± 0.628* |
| ICC (vertex based) | 0.225 ± 0.109 | 0.557 ± 0.127  |
| ICC (ROI based)    | 0.243         | 0.726          |
| S_subparietal      |               |                |
| R1 (1/s)           | 0.652 ± 0.039 | 0.617 ± 0.014* |
| CoV (vertex based) | 5.155 ± 4.180 | 1.446 ± 0.440* |
| CoV (ROI based)    | 4.746 ± 4.356 | 0.788 ± 0.449* |
| ICC (vertex based) | 0.260 ± 0.077 | 0.679 ± 0.115  |
| ICC (ROI based)    | 0.279         | 0.851          |
| S_temporal_inf     |               |                |
| R1 (1/s)           | 0.668 ± 0.035 | 0.636 ± 0.009* |
| CoV (vertex based) | 4.032 ± 3.045 | 1.286 ± 0.376* |
| CoV (ROI based)    | 3.518 ± 3.162 | 0.481 ± 0.310* |
| ICC (vertex based) | 0.392 ± 0.061 | 0.576 ± 0.119  |
| ICC (ROI based)    | 0.431         | 0.839          |
| S_temporal_sup     |               |                |
| R1 (1/s)           | 0.664 ± 0.035 | 0.633 ± 0.015* |
| CoV (vertex based) | 4.401 ± 3.751 | 1.345 ± 0.384* |
| CoV (ROI based)    | 3.784 ± 3.913 | 0.668 ± 0.430* |
| ICC (vertex based) | 0.307 ± 0.095 | 0.722 ± 0.116  |
| ICC (ROI based)    | 0.324         | 0.890          |

|                       |               |                |
|-----------------------|---------------|----------------|
| S_temporal_transverse |               |                |
| R1 (1/s)              | 0.676 ± 0.029 | 0.657 ± 0.024  |
| CoV (vertex based)    | 3.604 ± 3.260 | 1.574 ± 0.547* |
| CoV (ROI based)       | 3.184 ± 3.427 | 1.015 ± 0.385* |
| ICC (vertex based)    | 0.343 ± 0.090 | 0.821 ± 0.039  |
| ICC (ROI based)       | 0.312         | 0.911          |
