# Supplementary material for: FreeSurfer based cortical mapping and T1-relaxometry with MPnRAGE: Test-retest reliability with and without retrospective motion correction
Source: PubMed Central journal article supplement — Neuroimage. Author manuscript; Available in PMC 2021 Nov 15. (PMC8525331; doi:10.1016/j.neuroimage.2021.118447), 2021-08-03
Supplement: NIHMS1741393-supplement-2.pdf [file NIHMS1741393-supplement-2.pdf]

Supplementary Table 10: Measurement errors (% x 100) for regions of DK atlas.

|                         |          |  |       |
|-------------------------|----------|--|-------|
| bankssts                |          |  |       |
| R1                      | (roi)    |  | 0.84  |
| thickness               | (roi)    |  | 1.34  |
| s. area                 | (roi)    |  | 1.71  |
| volume                  | (roi)    |  | 3.02  |
| R1                      | (vertex) |  | 1.39  |
| thickness               | (vertex) |  | 2.94  |
| caudalanteriorcingulate |          |  |       |
| R1                      | (roi)    |  | 1.46  |
| thickness               | (roi)    |  | 2.42  |
| s. area                 | (roi)    |  | 2.02  |
| volume                  | (roi)    |  | 3.23  |
| R1                      | (vertex) |  | 3.10  |
| thickness               | (vertex) |  | 4.85  |
| caudalmiddlefrontal     |          |  |       |
| R1                      | (roi)    |  | 1.05  |
| thickness               | (roi)    |  | 1.76  |
| s. area                 | (roi)    |  | 1.15  |
| volume                  | (roi)    |  | 2.08  |
| R1                      | (vertex) |  | 1.94  |
| thickness               | (vertex) |  | 2.95  |
| cuneus                  |          |  |       |
| R1                      | (roi)    |  | 0.80  |
| thickness               | (roi)    |  | 1.28  |
| s. area                 | (roi)    |  | 1.41  |
| volume                  | (roi)    |  | 1.68  |
| R1                      | (vertex) |  | 1.30  |
| thickness               | (vertex) |  | 2.91  |
| entorhinal              |          |  |       |
| R1                      | (roi)    |  | 4.18  |
| thickness               | (roi)    |  | 3.06  |
| s. area                 | (roi)    |  | 5.32  |
| volume                  | (roi)    |  | 5.43  |
| R1                      | (vertex) |  | 12.54 |
| thickness               | (vertex) |  | 7.61  |
| fusiform                |          |  |       |

|                      |          |      |
|----------------------|----------|------|
| R1                   | (roi)    | 0.56 |
| thickness            | (roi)    | 0.97 |
| s. area              | (roi)    | 1.04 |
| volume               | (roi)    | 1.75 |
| R1                   | (vertex) | 2.12 |
| thickness            | (vertex) | 2.99 |
| inferiorparietal     |          |      |
| R1                   | (roi)    | 0.70 |
| thickness            | (roi)    | 0.61 |
| s. area              | (roi)    | 0.96 |
| volume               | (roi)    | 0.94 |
| R1                   | (vertex) | 1.37 |
| thickness            | (vertex) | 2.36 |
| inferiortemporal     |          |      |
| R1                   | (roi)    | 0.76 |
| thickness            | (roi)    | 1.06 |
| s. area              | (roi)    | 1.37 |
| volume               | (roi)    | 2.11 |
| R1                   | (vertex) | 1.86 |
| thickness            | (vertex) | 3.02 |
| isthmuscingulate     |          |      |
| R1                   | (roi)    | 1.02 |
| thickness            | (roi)    | 1.29 |
| s. area              | (roi)    | 1.74 |
| volume               | (roi)    | 2.24 |
| R1                   | (vertex) | 2.70 |
| thickness            | (vertex) | 4.08 |
| lateraloccipital     |          |      |
| R1                   | (roi)    | 0.70 |
| thickness            | (roi)    | 0.87 |
| s. area              | (roi)    | 0.97 |
| volume               | (roi)    | 1.37 |
| R1                   | (vertex) | 1.42 |
| thickness            | (vertex) | 2.51 |
| lateralorbitofrontal |          |      |
| R1                   | (roi)    | 1.22 |
| thickness            | (roi)    | 1.17 |
| s. area              | (roi)    | 2.54 |
| volume               | (roi)    | 2.09 |

|                     |           |          |      |
|---------------------|-----------|----------|------|
|                     | R1        | (vertex) | 2.58 |
|                     | thickness | (vertex) | 3.81 |
| lingual             |           |          |      |
|                     | R1        | (roi)    | 0.74 |
|                     | thickness | (roi)    | 1.40 |
|                     | s. area   | (roi)    | 1.45 |
|                     | volume    | (roi)    | 1.69 |
|                     | R1        | (vertex) | 1.92 |
|                     | thickness | (vertex) | 3.89 |
| medialorbitofrontal |           |          |      |
|                     | R1        | (roi)    | 1.71 |
|                     | thickness | (roi)    | 1.26 |
|                     | s. area   | (roi)    | 3.80 |
|                     | volume    | (roi)    | 2.57 |
|                     | R1        | (vertex) | 4.50 |
|                     | thickness | (vertex) | 5.40 |
| middletemporal      |           |          |      |
|                     | R1        | (roi)    | 0.69 |
|                     | thickness | (roi)    | 0.92 |
|                     | s. area   | (roi)    | 1.00 |
|                     | volume    | (roi)    | 1.41 |
|                     | R1        | (vertex) | 1.73 |
|                     | thickness | (vertex) | 2.71 |
| parahippocampal     |           |          |      |
|                     | R1        | (roi)    | 1.75 |
|                     | thickness | (roi)    | 1.38 |
|                     | s. area   | (roi)    | 2.65 |
|                     | volume    | (roi)    | 2.16 |
|                     | R1        | (vertex) | 3.99 |
|                     | thickness | (vertex) | 4.48 |
| paracentral         |           |          |      |
|                     | R1        | (roi)    | 0.63 |
|                     | thickness | (roi)    | 1.26 |
|                     | s. area   | (roi)    | 1.14 |
|                     | volume    | (roi)    | 1.83 |
|                     | R1        | (vertex) | 1.63 |
|                     | thickness | (vertex) | 2.70 |

parsopercularis  
R1 (roi) 0.98  
thickness (roi) 1.23  
s. area (roi) 1.44  
volume (roi) 1.71

R1 (vertex) 1.93  
thickness (vertex) 2.75

parsorbitalis  
R1 (roi) 1.44  
thickness (roi) 1.31  
s. area (roi) 1.77  
volume (roi) 2.21

R1 (vertex) 2.10  
thickness (vertex) 2.67

parstriangularis  
R1 (roi) 0.85  
thickness (roi) 0.80  
s. area (roi) 1.64  
volume (roi) 1.04

R1 (vertex) 1.96  
thickness (vertex) 2.77

pericalcarine  
R1 (roi) 0.81  
thickness (roi) 2.32  
s. area (roi) 1.53  
volume (roi) 3.26

R1 (vertex) 1.56  
thickness (vertex) 4.43

postcentral  
R1 (roi) 0.83  
thickness (roi) 1.02  
s. area (roi) 0.59  
volume (roi) 1.43

R1 (vertex) 1.83  
thickness (vertex) 2.88

posteriorcingulate  
R1 (roi) 1.11  
thickness (roi) 1.59

|                          |          |      |
|--------------------------|----------|------|
| s. area                  | (roi)    | 1.74 |
| volume                   | (roi)    | 2.37 |
| R1                       | (vertex) | 2.94 |
| thickness                | (vertex) | 4.30 |
| precentral               |          |      |
| R1                       | (roi)    | 0.78 |
| thickness                | (roi)    | 1.33 |
| s. area                  | (roi)    | 0.67 |
| volume                   | (roi)    | 1.38 |
| R1                       | (vertex) | 1.79 |
| thickness                | (vertex) | 2.80 |
| precuneus                |          |      |
| R1                       | (roi)    | 0.71 |
| thickness                | (roi)    | 0.85 |
| s. area                  | (roi)    | 0.91 |
| volume                   | (roi)    | 1.11 |
| R1                       | (vertex) | 1.54 |
| thickness                | (vertex) | 2.80 |
| rostralanteriorcingulate |          |      |
| R1                       | (roi)    | 1.16 |
| thickness                | (roi)    | 2.27 |
| s. area                  | (roi)    | 2.95 |
| volume                   | (roi)    | 4.78 |
| R1                       | (vertex) | 3.10 |
| thickness                | (vertex) | 4.64 |
| rostralmiddlefrontal     |          |      |
| R1                       | (roi)    | 1.01 |
| thickness                | (roi)    | 0.97 |
| s. area                  | (roi)    | 1.96 |
| volume                   | (roi)    | 1.46 |
| R1                       | (vertex) | 1.81 |
| thickness                | (vertex) | 3.07 |
| superiorfrontal          |          |      |
| R1                       | (roi)    | 1.09 |
| thickness                | (roi)    | 1.31 |
| s. area                  | (roi)    | 0.93 |
| volume                   | (roi)    | 1.16 |
| R1                       | (vertex) | 2.08 |

|                    |          |      |
|--------------------|----------|------|
| thickness          | (vertex) | 3.23 |
| superiorparietal   |          |      |
| R1                 | (roi)    | 0.71 |
| thickness          | (roi)    | 0.69 |
| s. area            | (roi)    | 0.76 |
| volume             | (roi)    | 1.06 |
| R1                 | (vertex) | 1.39 |
| thickness          | (vertex) | 2.42 |
| superiortemporal   |          |      |
| R1                 | (roi)    | 0.74 |
| thickness          | (roi)    | 0.98 |
| s. area            | (roi)    | 0.80 |
| volume             | (roi)    | 1.41 |
| R1                 | (vertex) | 1.91 |
| thickness          | (vertex) | 2.57 |
| supramarginal      |          |      |
| R1                 | (roi)    | 0.83 |
| thickness          | (roi)    | 0.77 |
| s. area            | (roi)    | 1.21 |
| volume             | (roi)    | 1.50 |
| R1                 | (vertex) | 1.62 |
| thickness          | (vertex) | 2.77 |
| frontalpole        |          |      |
| R1                 | (roi)    | 1.33 |
| thickness          | (roi)    | 3.10 |
| s. area            | (roi)    | 3.57 |
| volume             | (roi)    | 5.98 |
| R1                 | (vertex) | 1.95 |
| thickness          | (vertex) | 4.19 |
| temporalpole       |          |      |
| R1                 | (roi)    | 1.47 |
| thickness          | (roi)    | 1.79 |
| s. area            | (roi)    | 2.68 |
| volume             | (roi)    | 2.89 |
| R1                 | (vertex) | 4.04 |
| thickness          | (vertex) | 3.83 |
| transversetemporal |          |      |

|           |       |      |
|-----------|-------|------|
| R1        | (roi) | 0.87 |
| thickness | (roi) | 1.39 |
| s. area   | (roi) | 2.31 |
| volume    | (roi) | 2.55 |

|           |          |      |
|-----------|----------|------|
| R1        | (vertex) | 1.81 |
| thickness | (vertex) | 2.64 |

insula

|           |       |      |
|-----------|-------|------|
| R1        | (roi) | 0.82 |
| thickness | (roi) | 1.21 |
| s. area   | (roi) | 4.31 |
| volume    | (roi) | 3.59 |

|           |          |      |
|-----------|----------|------|
| R1        | (vertex) | 3.06 |
| thickness | (vertex) | 4.67 |
