# Supplementary material for: FreeSurfer based cortical mapping and T1-relaxometry with MPnRAGE: Test-retest reliability with and without retrospective motion correction
Source: PubMed Central journal article supplement — Neuroimage. Author manuscript; Available in PMC 2021 Nov 15. (PMC8525331; doi:10.1016/j.neuroimage.2021.118447), 2021-08-03
Supplement: NIHMS1741393-supplement-3.pdf [file NIHMS1741393-supplement-3.pdf]

Supplementary Table 2: R1 measurements for regions of DK atlas. Coefficients of variation (CoV) are given as % x 100. Statistically significant differences (at  $p < 0.05$  after FDR correction) of the parameter values and associated CoVs between non-motion corrected and motion corrected datasets are given with \*.

bankssts

|                    |                   |                     |
|--------------------|-------------------|---------------------|
| R1 (1/s)           | $0.666 \pm 0.033$ | $0.638 \pm 0.015^*$ |
| CoV (vertex based) | $4.194 \pm 3.397$ | $1.214 \pm 0.324^*$ |
| CoV (ROI based)    | $3.543 \pm 3.539$ | $0.772 \pm 0.350^*$ |
| ICC (vertex based) | $0.317 \pm 0.113$ | $0.742 \pm 0.113$   |
| ICC (ROI based)    | 0.360             | 0.871               |

caudalanteriorcingulate

|                    |                   |                     |
|--------------------|-------------------|---------------------|
| R1 (1/s)           | $0.678 \pm 0.079$ | $0.602 \pm 0.015^*$ |
| CoV (vertex based) | $9.080 \pm 8.107$ | $2.481 \pm 0.869^*$ |
| CoV (ROI based)    | $8.653 \pm 8.853$ | $1.179 \pm 0.883^*$ |
| ICC (vertex based) | $0.272 \pm 0.105$ | $0.540 \pm 0.129$   |
| ICC (ROI based)    | 0.242             | 0.691               |

caudalmiddlefrontal

|                    |                   |                     |
|--------------------|-------------------|---------------------|
| R1 (1/s)           | $0.670 \pm 0.041$ | $0.632 \pm 0.015^*$ |
| CoV (vertex based) | $4.968 \pm 3.974$ | $1.566 \pm 0.797^*$ |
| CoV (ROI based)    | $4.435 \pm 3.982$ | $0.831 \pm 0.718^*$ |
| ICC (vertex based) | $0.318 \pm 0.104$ | $0.656 \pm 0.093$   |
| ICC (ROI based)    | 0.360             | 0.796               |

cuneus

|                    |                   |                     |
|--------------------|-------------------|---------------------|
| R1 (1/s)           | $0.672 \pm 0.031$ | $0.651 \pm 0.020^*$ |
| CoV (vertex based) | $3.208 \pm 2.846$ | $1.107 \pm 0.386^*$ |

|                    |                 |                |
|--------------------|-----------------|----------------|
| CoV (ROI based)    | 2.775 ± 2.883   | 0.664 ± 0.483* |
| ICC (vertex based) | 0.432 ± 0.046   | 0.847 ± 0.044  |
| ICC (ROI based)    | 0.461           | 0.927          |
| entorhinal         |                 |                |
| R1 (1/s)           | 0.806 ± 0.185   | 0.733 ± 0.036* |
| CoV (vertex based) | 10.403 ± 10.358 | 6.168 ± 0.945  |
| CoV (ROI based)    | 10.415 ± 21.036 | 3.793 ± 2.026  |
| ICC (vertex based) | 0.117 ± 0.142   | 0.515 ± 0.123  |
| ICC (ROI based)    | -0.005          | 0.466          |
| fusiform           |                 |                |
| R1 (1/s)           | 0.668 ± 0.035   | 0.635 ± 0.014* |
| CoV (vertex based) | 4.582 ± 3.661   | 1.778 ± 0.425* |
| CoV (ROI based)    | 3.714 ± 3.864   | 0.449 ± 0.350* |
| ICC (vertex based) | 0.299 ± 0.157   | 0.643 ± 0.190  |
| ICC (ROI based)    | 0.341           | 0.937          |
| inferiorparietal   |                 |                |
| R1 (1/s)           | 0.661 ± 0.036   | 0.632 ± 0.015* |
| CoV (vertex based) | 4.006 ± 3.751   | 1.148 ± 0.409* |
| CoV (ROI based)    | 3.350 ± 3.773   | 0.559 ± 0.450* |
| ICC (vertex based) | 0.371 ± 0.095   | 0.787 ± 0.096  |
| ICC (ROI based)    | 0.409           | 0.911          |
| inferiortemporal   |                 |                |
| R1 (1/s)           | 0.668 ± 0.035   | 0.632 ± 0.010* |
| CoV (vertex based) | 4.625 ± 3.401   | 1.575 ± 0.514* |

|                      |               |                |
|----------------------|---------------|----------------|
| CoV (ROI based)      | 3.974 ± 3.548 | 0.547 ± 0.576* |
| ICC (vertex based)   | 0.313 ± 0.115 | 0.597 ± 0.145  |
| ICC (ROI based)      | 0.347         | 0.795          |
| isthmuscingulate     |               |                |
| R1 (1/s)             | 0.670 ± 0.036 | 0.641 ± 0.015* |
| CoV (vertex based)   | 4.786 ± 3.766 | 2.151 ± 0.535* |
| CoV (ROI based)      | 3.746 ± 4.016 | 0.837 ± 0.632* |
| ICC (vertex based)   | 0.267 ± 0.122 | 0.590 ± 0.127  |
| ICC (ROI based)      | 0.320         | 0.817          |
| lateraloccipital     |               |                |
| R1 (1/s)             | 0.674 ± 0.032 | 0.651 ± 0.018* |
| CoV (vertex based)   | 3.192 ± 2.488 | 1.170 ± 0.463* |
| CoV (ROI based)      | 2.659 ± 2.576 | 0.565 ± 0.449* |
| ICC (vertex based)   | 0.509 ± 0.096 | 0.815 ± 0.082  |
| ICC (ROI based)      | 0.544         | 0.929          |
| lateralorbitofrontal |               |                |
| R1 (1/s)             | 0.650 ± 0.036 | 0.611 ± 0.016* |
| CoV (vertex based)   | 5.794 ± 4.097 | 2.137 ± 0.825* |
| CoV (ROI based)      | 4.814 ± 4.215 | 0.955 ± 0.846* |
| ICC (vertex based)   | 0.203 ± 0.103 | 0.600 ± 0.127  |
| ICC (ROI based)      | 0.241         | 0.796          |
| lingual              |               |                |
| R1 (1/s)             | 0.667 ± 0.040 | 0.637 ± 0.023* |

|                     |               |                |
|---------------------|---------------|----------------|
| CoV (vertex based)  | 4.390 ± 3.818 | 1.638 ± 0.328* |
| CoV (ROI based)     | 3.647 ± 4.032 | 0.692 ± 0.306* |
| ICC (vertex based)  | 0.402 ± 0.135 | 0.811 ± 0.101  |
| ICC (ROI based)     | 0.407         | 0.954          |
| medialorbitofrontal |               |                |
| R1 (1/s)            | 0.645 ± 0.049 | 0.597 ± 0.016* |
| CoV (vertex based)  | 6.983 ± 5.840 | 2.803 ± 1.010* |
| CoV (ROI based)     | 5.690 ± 5.753 | 1.500 ± 0.860* |
| ICC (vertex based)  | 0.197 ± 0.134 | 0.515 ± 0.160  |
| ICC (ROI based)     | 0.256         | 0.668          |
| middletemporal      |               |                |
| R1 (1/s)            | 0.659 ± 0.031 | 0.631 ± 0.012* |
| CoV (vertex based)  | 3.995 ± 2.967 | 1.479 ± 0.453* |
| CoV (ROI based)     | 3.233 ± 2.991 | 0.600 ± 0.344* |
| ICC (vertex based)  | 0.358 ± 0.104 | 0.632 ± 0.119  |
| ICC (ROI based)     | 0.419         | 0.881          |
| parahippocampal     |               |                |
| R1 (1/s)            | 0.654 ± 0.031 | 0.627 ± 0.014* |
| CoV (vertex based)  | 5.221 ± 3.612 | 3.000 ± 0.752* |
| CoV (ROI based)     | 4.149 ± 4.125 | 1.566 ± 0.865* |
| ICC (vertex based)  | 0.223 ± 0.118 | 0.464 ± 0.155  |
| ICC (ROI based)     | 0.190         | 0.533          |
| paracentral         |               |                |

|                    |               |                |
|--------------------|---------------|----------------|
| R1 (1/s)           | 0.687 ± 0.033 | 0.656 ± 0.020* |
| CoV (vertex based) | 4.185 ± 3.860 | 1.369 ± 0.478* |
| CoV (ROI based)    | 3.586 ± 3.816 | 0.558 ± 0.318* |
| ICC (vertex based) | 0.291 ± 0.122 | 0.797 ± 0.083  |
| ICC (ROI based)    | 0.285         | 0.953          |
| parsopercularis    |               |                |
| R1 (1/s)           | 0.659 ± 0.039 | 0.621 ± 0.018* |
| CoV (vertex based) | 5.072 ± 4.164 | 1.632 ± 0.576* |
| CoV (ROI based)    | 4.480 ± 4.355 | 0.759 ± 0.651* |
| ICC (vertex based) | 0.304 ± 0.104 | 0.727 ± 0.103  |
| ICC (ROI based)    | 0.305         | 0.882          |
| parsorbitalis      |               |                |
| R1 (1/s)           | 0.656 ± 0.038 | 0.616 ± 0.018* |
| CoV (vertex based) | 5.473 ± 4.371 | 1.712 ± 1.040* |
| CoV (ROI based)    | 5.128 ± 4.362 | 1.135 ± 1.004* |
| ICC (vertex based) | 0.244 ± 0.093 | 0.638 ± 0.122  |
| ICC (ROI based)    | 0.237         | 0.763          |
| parstriangularis   |               |                |
| R1 (1/s)           | 0.656 ± 0.040 | 0.618 ± 0.019* |
| CoV (vertex based) | 5.100 ± 4.176 | 1.597 ± 0.585* |
| CoV (ROI based)    | 4.542 ± 4.197 | 0.710 ± 0.457* |
| ICC (vertex based) | 0.305 ± 0.116 | 0.758 ± 0.084  |
| ICC (ROI based)    | 0.343         | 0.927          |

|                    |               |                |
|--------------------|---------------|----------------|
| pericalcarine      |               |                |
| R1 (1/s)           | 0.687 ± 0.033 | 0.662 ± 0.022* |
| CoV (vertex based) | 3.486 ± 3.007 | 1.356 ± 0.287* |
| CoV (ROI based)    | 2.859 ± 3.149 | 0.733 ± 0.350* |
| ICC (vertex based) | 0.419 ± 0.102 | 0.833 ± 0.042  |
| ICC (ROI based)    | 0.446         | 0.936          |
| postcentral        |               |                |
| R1 (1/s)           | 0.685 ± 0.030 | 0.660 ± 0.019* |
| CoV (vertex based) | 4.198 ± 3.459 | 1.573 ± 0.422* |
| CoV (ROI based)    | 3.346 ± 3.358 | 0.753 ± 0.361* |
| ICC (vertex based) | 0.271 ± 0.137 | 0.750 ± 0.108  |
| ICC (ROI based)    | 0.292         | 0.915          |
| posteriorcingulate |               |                |
| R1 (1/s)           | 0.679 ± 0.067 | 0.623 ± 0.019* |
| CoV (vertex based) | 6.796 ± 5.690 | 2.251 ± 0.676* |
| CoV (ROI based)    | 6.228 ± 5.798 | 0.976 ± 0.566* |
| ICC (vertex based) | 0.321 ± 0.097 | 0.602 ± 0.121  |
| ICC (ROI based)    | 0.420         | 0.863          |
| precentral         |               |                |
| R1 (1/s)           | 0.688 ± 0.029 | 0.662 ± 0.019* |
| CoV (vertex based) | 4.129 ± 3.559 | 1.513 ± 0.521* |
| CoV (ROI based)    | 3.386 ± 3.457 | 0.687 ± 0.397* |
| ICC (vertex based) | 0.261 ± 0.131 | 0.752 ± 0.103  |
| ICC (ROI based)    | 0.265         | 0.922          |

|                          |               |                |
|--------------------------|---------------|----------------|
| precuneus                |               |                |
| R1 (1/s)                 | 0.659 ± 0.036 | 0.628 ± 0.015* |
| CoV (vertex based)       | 4.538 ± 3.888 | 1.301 ± 0.349* |
| CoV (ROI based)          | 3.973 ± 4.012 | 0.609 ± 0.397* |
| ICC (vertex based)       | 0.296 ± 0.111 | 0.755 ± 0.109  |
| ICC (ROI based)          | 0.317         | 0.912          |
| rostralanteriorcingulate |               |                |
| R1 (1/s)                 | 0.676 ± 0.088 | 0.595 ± 0.016* |
| CoV (vertex based)       | 9.348 ± 7.859 | 2.299 ± 0.816* |
| CoV (ROI based)          | 9.052 ± 9.002 | 0.995 ± 0.652* |
| ICC (vertex based)       | 0.327 ± 0.121 | 0.560 ± 0.141  |
| ICC (ROI based)          | 0.288         | 0.815          |
| rostralmiddlefrontal     |               |                |
| R1 (1/s)                 | 0.661 ± 0.042 | 0.621 ± 0.013* |
| CoV (vertex based)       | 4.976 ± 3.834 | 1.473 ± 0.691* |
| CoV (ROI based)          | 4.491 ± 3.942 | 0.793 ± 0.651* |
| ICC (vertex based)       | 0.366 ± 0.104 | 0.639 ± 0.127  |
| ICC (ROI based)          | 0.391         | 0.776          |
| superiorfrontal          |               |                |
| R1 (1/s)                 | 0.658 ± 0.035 | 0.620 ± 0.014* |
| CoV (vertex based)       | 4.715 ± 3.933 | 1.684 ± 0.846* |
| CoV (ROI based)          | 4.023 ± 3.965 | 0.897 ± 0.679* |
| ICC (vertex based)       | 0.272 ± 0.120 | 0.642 ± 0.118  |

|                    |               |                |
|--------------------|---------------|----------------|
| ICC (ROI based)    | 0.307         | 0.794          |
| superiorparietal   |               |                |
| R1 (1/s)           | 0.671 ± 0.038 | 0.640 ± 0.017* |
| CoV (vertex based) | 4.246 ± 3.620 | 1.173 ± 0.448* |
| CoV (ROI based)    | 3.696 ± 3.597 | 0.591 ± 0.430* |
| ICC (vertex based) | 0.366 ± 0.116 | 0.820 ± 0.078  |
| ICC (ROI based)    | 0.414         | 0.926          |
| superiortemporal   |               |                |
| R1 (1/s)           | 0.655 ± 0.028 | 0.633 ± 0.017* |
| CoV (vertex based) | 4.083 ± 3.115 | 1.636 ± 0.386* |
| CoV (ROI based)    | 3.143 ± 3.176 | 0.688 ± 0.294* |
| ICC (vertex based) | 0.296 ± 0.169 | 0.723 ± 0.125  |
| ICC (ROI based)    | 0.326         | 0.922          |
| supramarginal      |               |                |
| R1 (1/s)           | 0.660 ± 0.032 | 0.632 ± 0.015* |
| CoV (vertex based) | 4.271 ± 3.758 | 1.382 ± 0.478* |
| CoV (ROI based)    | 3.473 ± 3.637 | 0.754 ± 0.385* |
| ICC (vertex based) | 0.292 ± 0.117 | 0.741 ± 0.096  |
| ICC (ROI based)    | 0.334         | 0.882          |
| frontalpole        |               |                |
| R1 (1/s)           | 0.647 ± 0.035 | 0.607 ± 0.015* |
| CoV (vertex based) | 4.732 ± 3.490 | 1.601 ± 0.705* |
| CoV (ROI based)    | 4.321 ± 3.643 | 1.105 ± 0.835* |



|                    |               |                |
|--------------------|---------------|----------------|
| ICC (vertex based) | 0.319 ± 0.052 | 0.642 ± 0.060  |
| ICC (ROI based)    | 0.332         | 0.727          |
| temporalpole       |               |                |
| R1 (1/s)           | 0.646 ± 0.029 | 0.627 ± 0.014  |
| CoV (vertex based) | 4.552 ± 2.950 | 2.521 ± 0.900* |
| CoV (ROI based)    | 3.097 ± 3.149 | 1.316 ± 0.705  |
| ICC (vertex based) | 0.269 ± 0.116 | 0.539 ± 0.164  |
| ICC (ROI based)    | 0.374         | 0.628          |
| transversetemporal |               |                |
| R1 (1/s)           | 0.683 ± 0.029 | 0.665 ± 0.028* |
| CoV (vertex based) | 3.625 ± 3.244 | 1.575 ± 0.444* |
| CoV (ROI based)    | 2.835 ± 3.268 | 0.724 ± 0.532* |
| ICC (vertex based) | 0.344 ± 0.095 | 0.859 ± 0.058  |
| ICC (ROI based)    | 0.360         | 0.955          |
| insula             |               |                |
| R1 (1/s)           | 0.653 ± 0.041 | 0.616 ± 0.016* |
| CoV (vertex based) | 5.372 ± 4.224 | 2.286 ± 0.443* |
| CoV (ROI based)    | 4.263 ± 4.673 | 0.760 ± 0.305* |
| ICC (vertex based) | 0.314 ± 0.113 | 0.579 ± 0.139  |
| ICC (ROI based)    | 0.345         | 0.902          |
