# Supplementary material for: FreeSurfer based cortical mapping and T1-relaxometry with MPnRAGE: Test-retest reliability with and without retrospective motion correction
Source: PubMed Central journal article supplement — Neuroimage. Author manuscript; Available in PMC 2021 Nov 15. (PMC8525331; doi:10.1016/j.neuroimage.2021.118447), 2021-08-03
Supplement: NIHMS1741393-supplement-4.pdf [file NIHMS1741393-supplement-4.pdf]

Supplementary Table 3: Thickness measurements for regions of Destrieux atlas. Coefficients of variation (CoV) are given as % x 100. Statistically significant differences (at  $p < 0.05$  after FDR correction) of the parameter values and associated CoVs between non-motion corrected and motion corrected datasets are given with \*.

|                                         |               |                |
|-----------------------------------------|---------------|----------------|
| G_and_S_frontomargin<br>thickness (mm)  | 3.142 ± 0.229 | 3.022 ± 0.155* |
| CoV (vertex based)                      | 7.454 ± 4.904 | 3.011 ± 0.746* |
| CoV (ROI based)                         | 4.647 ± 4.223 | 1.791 ± 0.881  |
| ICC (vertex based)                      | 0.372 ± 0.196 | 0.795 ± 0.106  |
| ICC (ROI based)                         | 0.458         | 0.850          |
|                                         |               |                |
| G_and_S_occipital_inf<br>thickness (mm) | 2.993 ± 0.197 | 2.941 ± 0.163  |
| CoV (vertex based)                      | 4.784 ± 3.801 | 1.874 ± 0.542* |
| CoV (ROI based)                         | 1.876 ± 2.083 | 0.678 ± 0.530* |
| ICC (vertex based)                      | 0.630 ± 0.141 | 0.941 ± 0.028  |
| ICC (ROI based)                         | 0.834         | 0.975          |
|                                         |               |                |
| G_and_S_paracentral<br>thickness (mm)   | 2.800 ± 0.118 | 2.849 ± 0.143* |
| CoV (vertex based)                      | 5.969 ± 3.348 | 2.216 ± 0.630* |
| CoV (ROI based)                         | 3.382 ± 2.273 | 1.231 ± 0.599* |
| ICC (vertex based)                      | 0.392 ± 0.192 | 0.892 ± 0.055  |
| ICC (ROI based)                         | 0.404         | 0.926          |
|                                         |               |                |
| G_and_S_subcentral<br>thickness (mm)    | 2.962 ± 0.142 | 3.021 ± 0.127  |
| CoV (vertex based)                      | 5.607 ± 3.984 | 2.208 ± 0.362* |

|                                            |               |                |
|--------------------------------------------|---------------|----------------|
| CoV (ROI based)                            | 2.567 ± 2.547 | 0.983 ± 0.289* |
| ICC (vertex based)                         | 0.446 ± 0.214 | 0.888 ± 0.062  |
| ICC (ROI based)                            | 0.591         | 0.938          |
|                                            |               |                |
| G_and_S_transv_frontopol<br>thickness (mm) | 3.343 ± 0.351 | 3.161 ± 0.176  |
| CoV (vertex based)                         | 6.352 ± 4.009 | 2.764 ± 1.061* |
| CoV (ROI based)                            | 4.696 ± 3.965 | 1.650 ± 1.284* |
| ICC (vertex based)                         | 0.580 ± 0.187 | 0.816 ± 0.096  |
| ICC (ROI based)                            | 0.679         | 0.856          |
|                                            |               |                |
| G_and_S_cingul-Ant<br>thickness (mm)       | 3.109 ± 0.208 | 3.089 ± 0.113  |
| CoV (vertex based)                         | 8.365 ± 5.826 | 3.167 ± 1.188* |
| CoV (ROI based)                            | 4.574 ± 4.629 | 1.383 ± 0.827* |
| ICC (vertex based)                         | 0.349 ± 0.183 | 0.737 ± 0.144  |
| ICC (ROI based)                            | 0.398         | 0.816          |
|                                            |               |                |
| G_and_S_cingul-Mid-Ant<br>thickness (mm)   | 2.955 ± 0.191 | 3.031 ± 0.147* |
| CoV (vertex based)                         | 7.860 ± 5.633 | 3.103 ± 1.278* |
| CoV (ROI based)                            | 3.903 ± 3.571 | 1.772 ± 1.419* |
| ICC (vertex based)                         | 0.446 ± 0.160 | 0.805 ± 0.093  |
| ICC (ROI based)                            | 0.555         | 0.803          |
|                                            |               |                |
| G_and_S_cingul-Mid-Post<br>thickness (mm)  | 2.804 ± 0.179 | 2.903 ± 0.155* |

|                                         |               |                |
|-----------------------------------------|---------------|----------------|
| CoV (vertex based)                      | 7.808 ± 4.973 | 3.023 ± 1.118* |
| CoV (ROI based)                         | 4.330 ± 3.541 | 1.330 ± 1.125* |
| ICC (vertex based)                      | 0.358 ± 0.177 | 0.793 ± 0.108  |
| ICC (ROI based)                         | 0.496         | 0.902          |
|                                         |               |                |
| G_cingul-Post-dorsal<br>thickness (mm)  | 3.090 ± 0.169 | 3.174 ± 0.137  |
| CoV (vertex based)                      | 5.885 ± 3.713 | 2.582 ± 0.895* |
| CoV (ROI based)                         | 3.487 ± 2.958 | 0.925 ± 0.670* |
| ICC (vertex based)                      | 0.505 ± 0.165 | 0.773 ± 0.144  |
| ICC (ROI based)                         | 0.529         | 0.928          |
|                                         |               |                |
| G_cingul-Post-ventral<br>thickness (mm) | 3.005 ± 0.196 | 2.935 ± 0.185  |
| CoV (vertex based)                      | 6.579 ± 3.619 | 3.784 ± 1.447* |
| CoV (ROI based)                         | 3.750 ± 3.067 | 1.986 ± 1.133  |
| ICC (vertex based)                      | 0.557 ± 0.149 | 0.800 ± 0.070  |
| ICC (ROI based)                         | 0.563         | 0.876          |
|                                         |               |                |
| G_cuneus<br>thickness (mm)              | 2.376 ± 0.196 | 2.246 ± 0.128  |
| CoV (vertex based)                      | 8.021 ± 6.234 | 2.873 ± 0.546* |
| CoV (ROI based)                         | 5.729 ± 5.641 | 1.397 ± 0.606* |
| ICC (vertex based)                      | 0.337 ± 0.179 | 0.875 ± 0.086  |
| ICC (ROI based)                         | 0.336         | 0.927          |
|                                         |               |                |
| G_front_inf-Opercular                   |               |                |

|                                        |               |                |
|----------------------------------------|---------------|----------------|
| thickness (mm)                         | 2.900 ± 0.195 | 3.031 ± 0.126* |
| CoV (vertex based)                     | 5.559 ± 4.470 | 2.021 ± 0.515* |
| CoV (ROI based)                        | 3.447 ± 3.967 | 1.026 ± 0.546* |
| ICC (vertex based)                     | 0.550 ± 0.183 | 0.877 ± 0.095  |
| ICC (ROI based)                        | 0.615         | 0.919          |
|                                        |               |                |
| G_front_inf-Orbital<br>thickness (mm)  | 3.052 ± 0.177 | 3.087 ± 0.164  |
| CoV (vertex based)                     | 6.099 ± 4.222 | 1.991 ± 0.675* |
| CoV (ROI based)                        | 3.467 ± 3.231 | 1.113 ± 0.707* |
| ICC (vertex based)                     | 0.387 ± 0.160 | 0.882 ± 0.063  |
| ICC (ROI based)                        | 0.543         | 0.933          |
|                                        |               |                |
| G_front_inf-Triangul<br>thickness (mm) | 3.014 ± 0.161 | 3.050 ± 0.152  |
| CoV (vertex based)                     | 4.572 ± 3.242 | 1.760 ± 0.889* |
| CoV (ROI based)                        | 2.480 ± 2.624 | 0.920 ± 0.786* |
| ICC (vertex based)                     | 0.619 ± 0.154 | 0.899 ± 0.049  |
| ICC (ROI based)                        | 0.652         | 0.939          |
|                                        |               |                |
| G_front_middle<br>thickness (mm)       | 2.899 ± 0.177 | 2.932 ± 0.136  |
| CoV (vertex based)                     | 6.665 ± 4.281 | 2.323 ± 0.796* |
| CoV (ROI based)                        | 3.561 ± 2.743 | 0.982 ± 0.601* |
| ICC (vertex based)                     | 0.489 ± 0.202 | 0.878 ± 0.077  |
| ICC (ROI based)                        | 0.600         | 0.938          |

|                                           |               |                |
|-------------------------------------------|---------------|----------------|
| G_front_sup<br>thickness (mm)             | 3.254 ± 0.203 | 3.286 ± 0.142  |
| CoV (vertex based)                        | 7.122 ± 4.802 | 2.490 ± 0.813* |
| CoV (ROI based)                           | 3.705 ± 2.729 | 1.013 ± 0.513* |
| ICC (vertex based)                        | 0.451 ± 0.177 | 0.870 ± 0.070  |
| ICC (ROI based)                           | 0.600         | 0.931          |
|                                           |               |                |
| G_Ins_lg_and_S_cent_ins<br>thickness (mm) | 3.569 ± 0.189 | 3.634 ± 0.130  |
| CoV (vertex based)                        | 6.457 ± 4.157 | 3.715 ± 1.309* |
| CoV (ROI based)                           | 3.680 ± 3.791 | 1.183 ± 0.257  |
| ICC (vertex based)                        | 0.338 ± 0.135 | 0.577 ± 0.172  |
| ICC (ROI based)                           | 0.435         | 0.886          |
|                                           |               |                |
| G_insular_short<br>thickness (mm)         | 3.659 ± 0.233 | 3.672 ± 0.167  |
| CoV (vertex based)                        | 6.066 ± 3.992 | 3.756 ± 1.955* |
| CoV (ROI based)                           | 3.461 ± 3.761 | 1.892 ± 1.520  |
| ICC (vertex based)                        | 0.447 ± 0.202 | 0.618 ± 0.152  |
| ICC (ROI based)                           | 0.576         | 0.760          |
|                                           |               |                |
| G_occipital_middle<br>thickness (mm)      | 2.955 ± 0.119 | 2.948 ± 0.110  |
| CoV (vertex based)                        | 5.180 ± 4.220 | 1.691 ± 0.419* |
| CoV (ROI based)                           | 1.920 ± 2.046 | 0.605 ± 0.396* |
| ICC (vertex based)                        | 0.468 ± 0.216 | 0.920 ± 0.044  |
| ICC (ROI based)                           | 0.626         | 0.959          |

|                                         |               |                |
|-----------------------------------------|---------------|----------------|
| G_occipital_sup<br>thickness (mm)       | 2.670 ± 0.118 | 2.659 ± 0.148  |
| CoV (vertex based)                      | 5.416 ± 3.950 | 1.750 ± 0.593* |
| CoV (ROI based)                         | 2.674 ± 3.318 | 0.761 ± 0.465* |
| ICC (vertex based)                      | 0.530 ± 0.201 | 0.944 ± 0.039  |
| ICC (ROI based)                         | 0.430         | 0.974          |
|                                         |               |                |
| G_oc-temp_lat-fusifor<br>thickness (mm) | 3.100 ± 0.155 | 3.133 ± 0.080  |
| CoV (vertex based)                      | 5.886 ± 5.081 | 2.211 ± 0.543* |
| CoV (ROI based)                         | 3.278 ± 4.215 | 0.931 ± 0.429* |
| ICC (vertex based)                      | 0.428 ± 0.150 | 0.807 ± 0.106  |
| ICC (ROI based)                         | 0.408         | 0.844          |
|                                         |               |                |
| G_oc-temp_med-Lingual<br>thickness (mm) | 2.502 ± 0.282 | 2.359 ± 0.169* |
| CoV (vertex based)                      | 8.802 ± 5.364 | 3.587 ± 0.764* |
| CoV (ROI based)                         | 4.328 ± 2.837 | 1.644 ± 0.927* |
| ICC (vertex based)                      | 0.541 ± 0.158 | 0.861 ± 0.064  |
| ICC (ROI based)                         | 0.787         | 0.930          |
|                                         |               |                |
| G_oc-temp_med-Parahip<br>thickness (mm) | 2.969 ± 0.236 | 3.108 ± 0.122  |
| CoV (vertex based)                      | 9.510 ± 7.559 | 5.026 ± 0.835* |
| CoV (ROI based)                         | 5.575 ± 7.123 | 1.477 ± 0.916* |
| ICC (vertex based)                      | 0.457 ± 0.147 | 0.689 ± 0.184  |

|                                         |               |                |
|-----------------------------------------|---------------|----------------|
| ICC (ROI based)                         | 0.402         | 0.819          |
|                                         |               |                |
| G_orbital<br>thickness (mm)             | 3.174 ± 0.113 | 3.217 ± 0.133  |
| CoV (vertex based)                      | 5.976 ± 3.316 | 3.043 ± 0.657* |
| CoV (ROI based)                         | 2.741 ± 2.736 | 1.022 ± 0.739* |
| ICC (vertex based)                      | 0.388 ± 0.168 | 0.766 ± 0.160  |
| ICC (ROI based)                         | 0.319         | 0.904          |
|                                         |               |                |
| G_pariet_inf-Angular<br>thickness (mm)  | 2.987 ± 0.156 | 3.046 ± 0.156* |
| CoV (vertex based)                      | 6.286 ± 4.768 | 1.984 ± 0.448* |
| CoV (ROI based)                         | 2.720 ± 3.096 | 0.755 ± 0.336  |
| ICC (vertex based)                      | 0.487 ± 0.214 | 0.928 ± 0.047  |
| ICC (ROI based)                         | 0.561         | 0.972          |
|                                         |               |                |
| G_pariet_inf-Supramar<br>thickness (mm) | 3.027 ± 0.137 | 3.114 ± 0.129* |
| CoV (vertex based)                      | 6.074 ± 4.055 | 2.169 ± 0.547* |
| CoV (ROI based)                         | 2.544 ± 2.463 | 0.559 ± 0.300* |
| ICC (vertex based)                      | 0.465 ± 0.225 | 0.897 ± 0.063  |
| ICC (ROI based)                         | 0.571         | 0.974          |
|                                         |               |                |
| G_parietal_sup<br>thickness (mm)        | 2.755 ± 0.139 | 2.802 ± 0.144  |
| CoV (vertex based)                      | 7.729 ± 4.952 | 2.031 ± 0.669* |
| CoV (ROI based)                         | 3.434 ± 2.215 | 0.880 ± 0.335* |

|                                 |               |                |
|---------------------------------|---------------|----------------|
| ICC (vertex based)              | 0.356 ± 0.213 | 0.933 ± 0.037  |
| ICC (ROI based)                 | 0.527         | 0.966          |
|                                 |               |                |
| G_postcentral<br>thickness (mm) | 2.438 ± 0.159 | 2.477 ± 0.151  |
| CoV (vertex based)              | 7.723 ± 5.217 | 2.484 ± 0.386* |
| CoV (ROI based)                 | 4.047 ± 2.901 | 1.351 ± 0.503* |
| ICC (vertex based)              | 0.410 ± 0.236 | 0.909 ± 0.054  |
| ICC (ROI based)                 | 0.550         | 0.943          |
|                                 |               |                |
| G_precentral<br>thickness (mm)  | 2.888 ± 0.167 | 3.017 ± 0.151* |
| CoV (vertex based)              | 7.411 ± 5.087 | 2.123 ± 0.779* |
| CoV (ROI based)                 | 4.629 ± 3.595 | 1.281 ± 0.771* |
| ICC (vertex based)              | 0.345 ± 0.207 | 0.901 ± 0.050  |
| ICC (ROI based)                 | 0.385         | 0.916          |
|                                 |               |                |
| G_precuneus<br>thickness (mm)   | 2.840 ± 0.106 | 2.914 ± 0.110* |
| CoV (vertex based)              | 6.922 ± 4.393 | 2.267 ± 0.610* |
| CoV (ROI based)                 | 3.276 ± 2.580 | 0.689 ± 0.278* |
| ICC (vertex based)              | 0.454 ± 0.192 | 0.889 ± 0.073  |
| ICC (ROI based)                 | 0.297         | 0.959          |
|                                 |               |                |
| G_rectus<br>thickness (mm)      | 3.087 ± 0.242 | 3.039 ± 0.168  |
| CoV (vertex based)              | 8.244 ± 4.678 | 4.170 ± 1.402* |



|                                         |                 |                |
|-----------------------------------------|-----------------|----------------|
| CoV (ROI based)                         | 4.501 ± 3.668   | 1.213 ± 0.802* |
| ICC (vertex based)                      | 0.411 ± 0.119   | 0.645 ± 0.207  |
| ICC (ROI based)                         | 0.554           | 0.933          |
|                                         |                 |                |
| G_subcallosal<br>thickness (mm)         | 3.383 ± 0.463   | 3.515 ± 0.205  |
| CoV (vertex based)                      | 14.472 ± 13.884 | 6.699 ± 3.266* |
| CoV (ROI based)                         | 10.675 ± 12.486 | 4.360 ± 3.571* |
| ICC (vertex based)                      | 0.373 ± 0.078   | 0.474 ± 0.216  |
| ICC (ROI based)                         | 0.435           | 0.412          |
|                                         |                 |                |
| G_temp_sup-G_T_transv<br>thickness (mm) | 2.749 ± 0.180   | 2.865 ± 0.112* |
| CoV (vertex based)                      | 6.211 ± 5.839   | 1.995 ± 0.677* |
| CoV (ROI based)                         | 4.554 ± 5.390   | 1.225 ± 0.751* |
| ICC (vertex based)                      | 0.402 ± 0.138   | 0.839 ± 0.086  |
| ICC (ROI based)                         | 0.410           | 0.871          |
|                                         |                 |                |
| G_temp_sup-Lateral<br>thickness (mm)    | 3.126 ± 0.234   | 3.298 ± 0.132* |
| CoV (vertex based)                      | 6.919 ± 5.899   | 1.877 ± 0.573* |
| CoV (ROI based)                         | 4.614 ± 4.878   | 0.670 ± 0.505* |
| ICC (vertex based)                      | 0.451 ± 0.228   | 0.911 ± 0.058  |
| ICC (ROI based)                         | 0.505           | 0.955          |
|                                         |                 |                |
| G_temp_sup-Plan_polar<br>thickness (mm) | 3.391 ± 0.268   | 3.622 ± 0.193* |
| CoV (vertex based)                      | 8.738 ± 6.765   | 3.190 ± 1.260* |

|                                         |               |                |
|-----------------------------------------|---------------|----------------|
| CoV (ROI based)                         | 6.303 ± 6.263 | 1.609 ± 1.334* |
| ICC (vertex based)                      | 0.273 ± 0.144 | 0.740 ± 0.201  |
| ICC (ROI based)                         | 0.347         | 0.855          |
|                                         |               |                |
| G_temp_sup-Plan_tempo<br>thickness (mm) | 2.809 ± 0.161 | 2.930 ± 0.099* |
| CoV (vertex based)                      | 6.100 ± 5.331 | 2.087 ± 0.653* |
| CoV (ROI based)                         | 3.711 ± 2.970 | 1.173 ± 0.768* |
| ICC (vertex based)                      | 0.433 ± 0.204 | 0.868 ± 0.075  |
| ICC (ROI based)                         | 0.535         | 0.834          |
|                                         |               |                |
| G_temporal_inf<br>thickness (mm)        | 3.138 ± 0.235 | 3.246 ± 0.138  |
| CoV (vertex based)                      | 6.738 ± 5.410 | 2.412 ± 1.010* |
| CoV (ROI based)                         | 3.627 ± 4.542 | 1.023 ± 0.655  |
| ICC (vertex based)                      | 0.516 ± 0.215 | 0.831 ± 0.115  |
| ICC (ROI based)                         | 0.627         | 0.919          |
|                                         |               |                |
| G_temporal_middle<br>thickness (mm)     | 3.216 ± 0.167 | 3.333 ± 0.113* |
| CoV (vertex based)                      | 6.377 ± 5.314 | 2.144 ± 0.695* |
| CoV (ROI based)                         | 3.326 ± 4.469 | 0.829 ± 0.604* |
| ICC (vertex based)                      | 0.464 ± 0.179 | 0.851 ± 0.126  |
| ICC (ROI based)                         | 0.400         | 0.911          |
|                                         |               |                |
| Lat_Fis-ant-Horizont<br>thickness (mm)  | 2.762 ± 0.113 | 2.703 ± 0.128  |

|                                        |               |                |
|----------------------------------------|---------------|----------------|
| CoV (vertex based)                     | 8.144 ± 6.224 | 2.285 ± 0.982* |
| CoV (ROI based)                        | 6.148 ± 5.782 | 1.361 ± 0.926* |
| ICC (vertex based)                     | 0.195 ± 0.176 | 0.866 ± 0.070  |
| ICC (ROI based)                        | -0.119        | 0.887          |
|                                        |               |                |
| Lat_Fis-ant-Vertical<br>thickness (mm) | 2.787 ± 0.190 | 2.868 ± 0.171  |
| CoV (vertex based)                     | 5.593 ± 3.609 | 2.135 ± 0.769* |
| CoV (ROI based)                        | 4.453 ± 3.280 | 1.222 ± 0.843* |
| ICC (vertex based)                     | 0.591 ± 0.185 | 0.899 ± 0.043  |
| ICC (ROI based)                        | 0.551         | 0.939          |
|                                        |               |                |
| Lat_Fis-post<br>thickness (mm)         | 2.769 ± 0.197 | 2.822 ± 0.162  |
| CoV (vertex based)                     | 6.474 ± 4.599 | 2.497 ± 0.332* |
| CoV (ROI based)                        | 3.828 ± 3.640 | 1.190 ± 0.542* |
| ICC (vertex based)                     | 0.458 ± 0.188 | 0.848 ± 0.068  |
| ICC (ROI based)                        | 0.615         | 0.947          |
|                                        |               |                |
| Pole_occipital<br>thickness (mm)       | 2.361 ± 0.197 | 2.265 ± 0.183* |
| CoV (vertex based)                     | 6.377 ± 4.392 | 3.136 ± 0.959* |
| CoV (ROI based)                        | 3.291 ± 3.295 | 1.455 ± 1.053  |
| ICC (vertex based)                     | 0.606 ± 0.177 | 0.912 ± 0.043  |
| ICC (ROI based)                        | 0.727         | 0.951          |
|                                        |               |                |
| Pole_temporal                          |               |                |

|                     |               |                |
|---------------------|---------------|----------------|
| thickness (mm)      | 3.497 ± 0.221 | 3.653 ± 0.134* |
| CoV (vertex based)  | 6.534 ± 4.187 | 2.822 ± 1.121* |
| CoV (ROI based)     | 3.821 ± 3.087 | 1.285 ± 0.648* |
| ICC (vertex based)  | 0.437 ± 0.191 | 0.744 ± 0.183  |
| ICC (ROI based)     | 0.595         | 0.855          |
| S_calcarine         |               |                |
| thickness (mm)      | 2.518 ± 0.212 | 2.387 ± 0.178  |
| CoV (vertex based)  | 8.304 ± 5.464 | 3.344 ± 0.546* |
| CoV (ROI based)     | 4.744 ± 4.751 | 1.362 ± 0.601* |
| ICC (vertex based)  | 0.447 ± 0.207 | 0.870 ± 0.064  |
| ICC (ROI based)     | 0.517         | 0.955          |
| S_central           |               |                |
| thickness (mm)      | 2.254 ± 0.129 | 2.229 ± 0.100  |
| CoV (vertex based)  | 7.839 ± 5.993 | 2.434 ± 0.441* |
| CoV (ROI based)     | 3.611 ± 3.665 | 1.132 ± 0.676* |
| ICC (vertex based)  | 0.293 ± 0.172 | 0.863 ± 0.076  |
| ICC (ROI based)     | 0.417         | 0.916          |
| S_cingul-Marginalis |               |                |
| thickness (mm)      | 2.603 ± 0.176 | 2.684 ± 0.155* |
| CoV (vertex based)  | 7.320 ± 4.888 | 2.579 ± 0.896* |
| CoV (ROI based)     | 2.984 ± 2.502 | 1.251 ± 1.042* |
| ICC (vertex based)  | 0.444 ± 0.143 | 0.856 ± 0.085  |
| ICC (ROI based)     | 0.727         | 0.921          |

|                                         |               |                |
|-----------------------------------------|---------------|----------------|
| S_circular_insula_ant<br>thickness (mm) | 3.254 ± 0.148 | 3.276 ± 0.140  |
| CoV (vertex based)                      | 5.860 ± 3.274 | 2.742 ± 0.896* |
| CoV (ROI based)                         | 3.389 ± 3.041 | 1.301 ± 0.668  |
| ICC (vertex based)                      | 0.397 ± 0.138 | 0.784 ± 0.102  |
| ICC (ROI based)                         | 0.376         | 0.882          |
|                                         |               |                |
| S_circular_insula_inf<br>thickness (mm) | 3.037 ± 0.200 | 3.172 ± 0.138* |
| CoV (vertex based)                      | 7.712 ± 5.976 | 2.869 ± 0.630* |
| CoV (ROI based)                         | 4.317 ± 5.118 | 1.283 ± 0.631* |
| ICC (vertex based)                      | 0.352 ± 0.122 | 0.790 ± 0.105  |
| ICC (ROI based)                         | 0.444         | 0.892          |
|                                         |               |                |
| S_circular_insula_sup<br>thickness (mm) | 2.849 ± 0.156 | 2.871 ± 0.100  |
| CoV (vertex based)                      | 7.880 ± 5.158 | 3.181 ± 0.998* |
| CoV (ROI based)                         | 5.327 ± 4.678 | 1.454 ± 0.698* |
| ICC (vertex based)                      | 0.178 ± 0.166 | 0.574 ± 0.223  |
| ICC (ROI based)                         | 0.219         | 0.802          |
|                                         |               |                |
| S_collat_transv_ant<br>thickness (mm)   | 2.893 ± 0.245 | 3.019 ± 0.141  |
| CoV (vertex based)                      | 6.980 ± 5.600 | 2.403 ± 0.677* |
| CoV (ROI based)                         | 5.055 ± 5.633 | 1.252 ± 0.637* |
| ICC (vertex based)                      | 0.506 ± 0.145 | 0.832 ± 0.095  |
| ICC (ROI based)                         | 0.538         | 0.910          |

|                                        |               |                |
|----------------------------------------|---------------|----------------|
| S_collat_transv_post<br>thickness (mm) | 2.695 ± 0.107 | 2.667 ± 0.109  |
| CoV (vertex based)                     | 5.445 ± 4.025 | 1.933 ± 0.793* |
| CoV (ROI based)                        | 3.212 ± 2.958 | 1.208 ± 0.709* |
| ICC (vertex based)                     | 0.360 ± 0.144 | 0.870 ± 0.059  |
| ICC (ROI based)                        | 0.312         | 0.887          |
|                                        |               |                |
| S_front_inf<br>thickness (mm)          | 2.658 ± 0.155 | 2.662 ± 0.126  |
| CoV (vertex based)                     | 6.566 ± 4.302 | 2.504 ± 1.113* |
| CoV (ROI based)                        | 3.438 ± 2.955 | 1.221 ± 0.987* |
| ICC (vertex based)                     | 0.484 ± 0.181 | 0.826 ± 0.090  |
| ICC (ROI based)                        | 0.551         | 0.891          |
|                                        |               |                |
| S_front_middle<br>thickness (mm)       | 2.824 ± 0.203 | 2.761 ± 0.124  |
| CoV (vertex based)                     | 8.786 ± 5.741 | 2.509 ± 0.671* |
| CoV (ROI based)                        | 6.121 ± 5.648 | 1.099 ± 0.572* |
| ICC (vertex based)                     | 0.246 ± 0.160 | 0.834 ± 0.081  |
| ICC (ROI based)                        | 0.226         | 0.923          |
|                                        |               |                |
| S_front_sup<br>thickness (mm)          | 2.750 ± 0.147 | 2.789 ± 0.113  |
| CoV (vertex based)                     | 7.653 ± 4.852 | 2.755 ± 1.222* |
| CoV (ROI based)                        | 5.155 ± 3.612 | 1.557 ± 1.395* |
| ICC (vertex based)                     | 0.269 ± 0.147 | 0.757 ± 0.107  |

|                                             |               |                |
|---------------------------------------------|---------------|----------------|
| ICC (ROI based)                             | 0.284         | 0.775          |
| S_interm_prim-Jensen<br>thickness (mm)      | 2.909 ± 0.210 | 2.991 ± 0.208* |
| CoV (vertex based)                          | 6.439 ± 3.892 | 2.190 ± 0.583* |
| CoV (ROI based)                             | 3.367 ± 2.522 | 1.015 ± 0.703* |
| ICC (vertex based)                          | 0.522 ± 0.183 | 0.917 ± 0.048  |
| ICC (ROI based)                             | 0.704         | 0.965          |
| S_intrapariet_and_P_trans<br>thickness (mm) | 2.626 ± 0.146 | 2.616 ± 0.143  |
| CoV (vertex based)                          | 7.806 ± 5.955 | 2.129 ± 0.553* |
| CoV (ROI based)                             | 4.089 ± 3.594 | 0.780 ± 0.427* |
| ICC (vertex based)                          | 0.285 ± 0.211 | 0.898 ± 0.055  |
| ICC (ROI based)                             | 0.383         | 0.973          |
| S_oc_middle_and_Lunatus<br>thickness (mm)   | 2.678 ± 0.213 | 2.610 ± 0.141  |
| CoV (vertex based)                          | 5.337 ± 4.068 | 1.644 ± 0.429* |
| CoV (ROI based)                             | 2.930 ± 2.775 | 0.916 ± 0.451* |
| ICC (vertex based)                          | 0.529 ± 0.142 | 0.930 ± 0.027  |
| ICC (ROI based)                             | 0.751         | 0.964          |
| S_oc_sup_and_transversal<br>thickness (mm)  | 2.642 ± 0.130 | 2.625 ± 0.137  |
| CoV (vertex based)                          | 5.607 ± 4.414 | 1.903 ± 0.588* |
| CoV (ROI based)                             | 2.706 ± 2.629 | 1.189 ± 0.699* |

|                                             |               |                |
|---------------------------------------------|---------------|----------------|
| ICC (vertex based)                          | 0.412 ± 0.167 | 0.903 ± 0.044  |
| ICC (ROI based)                             | 0.564         | 0.928          |
|                                             |               |                |
| S_occipital_ant<br>thickness (mm)           | 2.828 ± 0.187 | 2.821 ± 0.165  |
| CoV (vertex based)                          | 5.608 ± 3.753 | 1.794 ± 0.413* |
| CoV (ROI based)                             | 2.849 ± 2.131 | 0.955 ± 0.557* |
| ICC (vertex based)                          | 0.556 ± 0.102 | 0.937 ± 0.025  |
| ICC (ROI based)                             | 0.738         | 0.963          |
|                                             |               |                |
| S_oc-temp_lat<br>thickness (mm)             | 2.938 ± 0.160 | 2.975 ± 0.117  |
| CoV (vertex based)                          | 6.502 ± 5.764 | 2.188 ± 0.734* |
| CoV (ROI based)                             | 3.898 ± 5.522 | 1.079 ± 0.599* |
| ICC (vertex based)                          | 0.392 ± 0.197 | 0.840 ± 0.109  |
| ICC (ROI based)                             | 0.295         | 0.903          |
|                                             |               |                |
| S_oc-temp_med_and_Lingual<br>thickness (mm) | 2.663 ± 0.187 | 2.781 ± 0.137* |
| CoV (vertex based)                          | 6.879 ± 6.029 | 2.341 ± 0.657* |
| CoV (ROI based)                             | 4.504 ± 5.426 | 1.122 ± 0.772* |
| ICC (vertex based)                          | 0.435 ± 0.150 | 0.856 ± 0.069  |
| ICC (ROI based)                             | 0.446         | 0.925          |
|                                             |               |                |
| S_orbital_lateral<br>thickness (mm)         | 3.107 ± 0.386 | 2.925 ± 0.200* |
| CoV (vertex based)                          | 6.795 ± 4.985 | 2.271 ± 0.624* |



|                                        |               |                |
|----------------------------------------|---------------|----------------|
| CoV (ROI based)                        | 5.231 ± 5.533 | 1.477 ± 0.737  |
| ICC (vertex based)                     | 0.582 ± 0.090 | 0.902 ± 0.034  |
| ICC (ROI based)                        | 0.663         | 0.938          |
|                                        |               |                |
| S_orbital_med-olfact<br>thickness (mm) | 2.653 ± 0.174 | 2.691 ± 0.148  |
| CoV (vertex based)                     | 9.082 ± 6.666 | 4.207 ± 1.368* |
| CoV (ROI based)                        | 3.965 ± 4.252 | 1.761 ± 0.868  |
| ICC (vertex based)                     | 0.314 ± 0.147 | 0.595 ± 0.173  |
| ICC (ROI based)                        | 0.473         | 0.867          |
|                                        |               |                |
| S_orbital-H_Shaped<br>thickness (mm)   | 2.970 ± 0.100 | 2.978 ± 0.144  |
| CoV (vertex based)                     | 5.669 ± 3.116 | 2.441 ± 0.577* |
| CoV (ROI based)                        | 3.461 ± 3.039 | 1.248 ± 0.851* |
| ICC (vertex based)                     | 0.346 ± 0.174 | 0.822 ± 0.110  |
| ICC (ROI based)                        | 0.151         | 0.903          |
|                                        |               |                |
| S_parieto_occipital<br>thickness (mm)  | 2.635 ± 0.147 | 2.635 ± 0.135  |
| CoV (vertex based)                     | 5.721 ± 3.815 | 2.010 ± 0.491* |
| CoV (ROI based)                        | 2.477 ± 1.873 | 1.033 ± 0.616* |
| ICC (vertex based)                     | 0.471 ± 0.220 | 0.894 ± 0.068  |
| ICC (ROI based)                        | 0.731         | 0.943          |
|                                        |               |                |
| S_pericallosal<br>thickness (mm)       | 2.424 ± 0.290 | 2.341 ± 0.159  |

|                                         |                |                |
|-----------------------------------------|----------------|----------------|
| CoV (vertex based)                      | 11.821 ± 7.464 | 5.018 ± 1.342* |
| CoV (ROI based)                         | 4.845 ± 4.533  | 1.669 ± 0.860  |
| ICC (vertex based)                      | 0.518 ± 0.163  | 0.782 ± 0.104  |
| ICC (ROI based)                         | 0.744          | 0.921          |
|                                         |                |                |
| S_postcentral<br>thickness (mm)         | 2.525 ± 0.165  | 2.595 ± 0.161* |
| CoV (vertex based)                      | 7.472 ± 4.983  | 2.572 ± 0.602* |
| CoV (ROI based)                         | 3.819 ± 2.610  | 1.176 ± 0.604* |
| ICC (vertex based)                      | 0.406 ± 0.181  | 0.887 ± 0.059  |
| ICC (ROI based)                         | 0.610          | 0.955          |
|                                         |                |                |
| S_precentral-inf-part<br>thickness (mm) | 2.695 ± 0.201  | 2.767 ± 0.140* |
| CoV (vertex based)                      | 6.954 ± 5.197  | 2.268 ± 1.237* |
| CoV (ROI based)                         | 3.321 ± 2.205  | 1.239 ± 1.388* |
| ICC (vertex based)                      | 0.425 ± 0.174  | 0.862 ± 0.062  |
| ICC (ROI based)                         | 0.760          | 0.880          |
|                                         |                |                |
| S_precentral-sup-part<br>thickness (mm) | 2.692 ± 0.169  | 2.765 ± 0.182* |
| CoV (vertex based)                      | 7.916 ± 4.378  | 3.350 ± 1.553* |
| CoV (ROI based)                         | 4.991 ± 3.083  | 2.309 ± 1.434* |
| ICC (vertex based)                      | 0.332 ± 0.163  | 0.799 ± 0.097  |
| ICC (ROI based)                         | 0.434          | 0.846          |
|                                         |                |                |
| S_suborbital                            |                |                |

|                                  |               |                |
|----------------------------------|---------------|----------------|
| thickness (mm)                   | 3.320 ± 0.238 | 3.089 ± 0.158  |
| CoV (vertex based)               | 9.589 ± 6.186 | 3.670 ± 1.559* |
| CoV (ROI based)                  | 7.150 ± 6.145 | 1.703 ± 0.931* |
| ICC (vertex based)               | 0.370 ± 0.143 | 0.791 ± 0.131  |
| ICC (ROI based)                  | 0.142         | 0.867          |
|                                  |               |                |
| S_subparietal<br>thickness (mm)  | 2.866 ± 0.127 | 2.866 ± 0.128  |
| CoV (vertex based)               | 6.798 ± 4.450 | 2.449 ± 0.721* |
| CoV (ROI based)                  | 3.096 ± 2.722 | 0.949 ± 0.565* |
| ICC (vertex based)               | 0.377 ± 0.161 | 0.838 ± 0.071  |
| ICC (ROI based)                  | 0.430         | 0.936          |
|                                  |               |                |
| S_temporal_inf<br>thickness (mm) | 3.052 ± 0.233 | 3.101 ± 0.179  |
| CoV (vertex based)               | 6.468 ± 5.403 | 2.088 ± 0.538* |
| CoV (ROI based)                  | 3.539 ± 4.407 | 0.886 ± 0.523* |
| ICC (vertex based)               | 0.544 ± 0.168 | 0.909 ± 0.075  |
| ICC (ROI based)                  | 0.648         | 0.967          |
|                                  |               |                |
| S_temporal_sup<br>thickness (mm) | 2.850 ± 0.171 | 2.950 ± 0.104* |
| CoV (vertex based)               | 6.989 ± 5.626 | 2.121 ± 0.522* |
| CoV (ROI based)                  | 3.504 ± 3.693 | 0.781 ± 0.447* |
| ICC (vertex based)               | 0.423 ± 0.201 | 0.874 ± 0.083  |
| ICC (ROI based)                  | 0.535         | 0.934          |

|                                         |               |                |
|-----------------------------------------|---------------|----------------|
| S_temporal_transverse<br>thickness (mm) | 2.637 ± 0.219 | 2.773 ± 0.137* |
| CoV (vertex based)                      | 6.717 ± 5.761 | 2.076 ± 0.445* |
| CoV (ROI based)                         | 5.183 ± 5.078 | 1.336 ± 0.392* |
| ICC (vertex based)                      | 0.549 ± 0.098 | 0.881 ± 0.058  |
| ICC (ROI based)                         | 0.537         | 0.920          |
