# Supplementary material for: FreeSurfer based cortical mapping and T1-relaxometry with MPnRAGE: Test-retest reliability with and without retrospective motion correction
Source: PubMed Central journal article supplement — Neuroimage. Author manuscript; Available in PMC 2021 Nov 15. (PMC8525331; doi:10.1016/j.neuroimage.2021.118447), 2021-08-03
Supplement: NIHMS1741393-supplement-5.pdf [file NIHMS1741393-supplement-5.pdf]

Supplementary Table 4: Thickness measurements for regions of DK atlas. Coefficients of variation (CoV) are given as % x 100. Statistically significant differences (at  $p < 0.05$  after FDR correction) of the parameter values and associated CoVs between non-motion corrected and motion corrected datasets are given with \*.

|                         |                |                |
|-------------------------|----------------|----------------|
| bankssts                |                |                |
| thickness (mm)          | 2.850 ± 0.198  | 2.968 ± 0.122  |
| CoV (vertex based)      | 7.053 ± 5.489  | 2.284 ± 0.682* |
| CoV (ROI based)         | 4.355 ± 4.568  | 1.182 ± 0.635  |
| ICC (vertex based)      | 0.438 ± 0.182  | 0.851 ± 0.094  |
| ICC (ROI based)         | 0.488          | 0.892          |
| caudalanteriorcingulate |                |                |
| thickness (mm)          | 2.803 ± 0.245  | 2.806 ± 0.130  |
| CoV (vertex based)      | 10.578 ± 7.437 | 3.949 ± 1.190* |
| CoV (ROI based)         | 6.313 ± 6.550  | 2.139 ± 1.252  |
| ICC (vertex based)      | 0.426 ± 0.159  | 0.773 ± 0.098  |
| ICC (ROI based)         | 0.421          | 0.750          |
| caudalmiddlefrontal     |                |                |
| thickness (mm)          | 2.758 ± 0.199  | 2.842 ± 0.151* |
| CoV (vertex based)      | 6.702 ± 4.487  | 2.481 ± 1.149* |
| CoV (ROI based)         | 3.116 ± 2.676  | 1.398 ± 1.191  |
| ICC (vertex based)      | 0.469 ± 0.211  | 0.849 ± 0.086  |
| ICC (ROI based)         | 0.743          | 0.890          |
| cuneus                  |                |                |
| thickness (mm)          | 2.444 ± 0.186  | 2.340 ± 0.134  |
| CoV (vertex based)      | 7.021 ± 5.788  | 2.473 ± 0.577* |
| CoV (ROI based)         | 4.791 ± 5.155  | 1.102 ± 0.641* |

|                    |                |                |
|--------------------|----------------|----------------|
| ICC (vertex based) | 0.377 ± 0.187  | 0.904 ± 0.058  |
| ICC (ROI based)    | 0.384          | 0.947          |
| entorhinal         |                |                |
| thickness (mm)     | 3.052 ± 0.284  | 3.222 ± 0.091* |
| CoV (vertex based) | 11.795 ± 8.701 | 6.479 ± 1.231* |
| CoV (ROI based)    | 7.681 ± 7.932  | 2.533 ± 1.711  |
| ICC (vertex based) | 0.401 ± 0.134  | 0.578 ± 0.200  |
| ICC (ROI based)    | 0.382          | 0.317          |
| fusiform           |                |                |
| thickness (mm)     | 2.980 ± 0.156  | 3.053 ± 0.072  |
| CoV (vertex based) | 6.018 ± 4.831  | 2.348 ± 0.653* |
| CoV (ROI based)    | 2.890 ± 4.072  | 0.821 ± 0.540  |
| ICC (vertex based) | 0.475 ± 0.177  | 0.807 ± 0.115  |
| ICC (ROI based)    | 0.493          | 0.835          |
| inferiorparietal   |                |                |
| thickness (mm)     | 2.901 ± 0.124  | 2.942 ± 0.126* |
| CoV (vertex based) | 6.079 ± 4.519  | 1.961 ± 0.342* |
| CoV (ROI based)    | 1.783 ± 1.461  | 0.573 ± 0.227* |
| ICC (vertex based) | 0.468 ± 0.215  | 0.914 ± 0.047  |
| ICC (ROI based)    | 0.746          | 0.978          |
| inferiortemporal   |                |                |
| thickness (mm)     | 3.098 ± 0.215  | 3.186 ± 0.128  |
| CoV (vertex based) | 6.585 ± 5.255  | 2.365 ± 0.855* |

|                      |               |                |
|----------------------|---------------|----------------|
| CoV (ROI based)      | 3.161 ± 4.187 | 0.909 ± 0.613  |
| ICC (vertex based)   | 0.508 ± 0.203 | 0.845 ± 0.113  |
| ICC (ROI based)      | 0.645         | 0.926          |
| isthmuscingulate     |               |                |
| thickness (mm)       | 2.863 ± 0.135 | 2.818 ± 0.131  |
| CoV (vertex based)   | 7.034 ± 4.003 | 3.432 ± 0.822* |
| CoV (ROI based)      | 2.035 ± 2.147 | 1.086 ± 0.723  |
| ICC (vertex based)   | 0.534 ± 0.181 | 0.824 ± 0.074  |
| ICC (ROI based)      | 0.679         | 0.920          |
| lateraloccipital     |               |                |
| thickness (mm)       | 2.680 ± 0.156 | 2.621 ± 0.139* |
| CoV (vertex based)   | 5.511 ± 3.941 | 2.161 ± 0.568* |
| CoV (ROI based)      | 2.365 ± 2.308 | 0.795 ± 0.410* |
| ICC (vertex based)   | 0.553 ± 0.196 | 0.926 ± 0.039  |
| ICC (ROI based)      | 0.726         | 0.971          |
| lateralorbitofrontal |               |                |
| thickness (mm)       | 3.039 ± 0.102 | 3.082 ± 0.104  |
| CoV (vertex based)   | 6.379 ± 3.576 | 3.083 ± 0.638* |
| CoV (ROI based)      | 2.945 ± 2.763 | 1.029 ± 0.552  |
| ICC (vertex based)   | 0.348 ± 0.196 | 0.744 ± 0.156  |
| ICC (ROI based)      | 0.259         | 0.880          |
| lingual              |               |                |
| thickness (mm)       | 2.519 ± 0.218 | 2.414 ± 0.151* |

|                     |               |                |
|---------------------|---------------|----------------|
| CoV (vertex based)  | 8.400 ± 5.597 | 3.251 ± 0.697* |
| CoV (ROI based)     | 3.253 ± 2.737 | 1.268 ± 0.651* |
| ICC (vertex based)  | 0.485 ± 0.173 | 0.871 ± 0.064  |
| ICC (ROI based)     | 0.772         | 0.946          |
| medialorbitofrontal |               |                |
| thickness (mm)      | 3.108 ± 0.215 | 3.002 ± 0.132  |
| CoV (vertex based)  | 9.157 ± 5.170 | 4.102 ± 1.357* |
| CoV (ROI based)     | 5.103 ± 3.795 | 1.103 ± 0.664* |
| ICC (vertex based)  | 0.381 ± 0.145 | 0.672 ± 0.200  |
| ICC (ROI based)     | 0.404         | 0.916          |
| middletemporal      |               |                |
| thickness (mm)      | 3.139 ± 0.167 | 3.249 ± 0.105* |
| CoV (vertex based)  | 6.712 ± 5.584 | 2.167 ± 0.645* |
| CoV (ROI based)     | 3.332 ± 4.575 | 0.748 ± 0.599* |
| ICC (vertex based)  | 0.431 ± 0.202 | 0.850 ± 0.117  |
| ICC (ROI based)     | 0.415         | 0.914          |
| parahippocampal     |               |                |
| thickness (mm)      | 2.841 ± 0.265 | 2.970 ± 0.213  |
| CoV (vertex based)  | 8.026 ± 7.207 | 3.512 ± 0.860* |
| CoV (ROI based)     | 4.956 ± 7.118 | 1.130 ± 0.756  |
| ICC (vertex based)  | 0.478 ± 0.136 | 0.819 ± 0.109  |
| ICC (ROI based)     | 0.520         | 0.961          |

paracentral

|                    |               |                |
|--------------------|---------------|----------------|
| thickness (mm)     | 2.858 ± 0.116 | 2.892 ± 0.134  |
| CoV (vertex based) | 6.340 ± 4.088 | 2.292 ± 0.683* |
| CoV (ROI based)    | 2.440 ± 2.028 | 1.152 ± 0.596  |
| ICC (vertex based) | 0.429 ± 0.166 | 0.882 ± 0.090  |
| ICC (ROI based)    | 0.546         | 0.922          |
| parsopercularis    |               |                |
| thickness (mm)     | 2.809 ± 0.177 | 2.899 ± 0.106  |
| CoV (vertex based) | 6.084 ± 4.380 | 2.180 ± 0.735* |
| CoV (ROI based)    | 3.740 ± 3.418 | 1.059 ± 0.577* |
| ICC (vertex based) | 0.496 ± 0.226 | 0.834 ± 0.143  |
| ICC (ROI based)    | 0.572         | 0.891          |
| parsorbitalis      |               |                |
| thickness (mm)     | 3.169 ± 0.137 | 3.175 ± 0.155  |
| CoV (vertex based) | 5.714 ± 3.546 | 2.211 ± 0.700* |
| CoV (ROI based)    | 2.473 ± 2.008 | 1.135 ± 0.655  |
| ICC (vertex based) | 0.428 ± 0.169 | 0.877 ± 0.058  |
| ICC (ROI based)    | 0.575         | 0.925          |
| parstriangularis   |               |                |
| thickness (mm)     | 2.901 ± 0.150 | 2.889 ± 0.134  |
| CoV (vertex based) | 6.409 ± 4.489 | 2.188 ± 0.917* |
| CoV (ROI based)    | 3.148 ± 2.841 | 0.763 ± 0.308* |
| ICC (vertex based) | 0.434 ± 0.280 | 0.868 ± 0.087  |
| ICC (ROI based)    | 0.518         | 0.967          |

|                    |               |                |
|--------------------|---------------|----------------|
| pericalcarine      |               |                |
| thickness (mm)     | 2.177 ± 0.264 | 2.023 ± 0.165  |
| CoV (vertex based) | 9.294 ± 6.250 | 3.808 ± 0.602* |
| CoV (ROI based)    | 6.291 ± 5.611 | 2.064 ± 1.036  |
| ICC (vertex based) | 0.421 ± 0.204 | 0.856 ± 0.075  |
| ICC (ROI based)    | 0.566         | 0.916          |
| postcentral        |               |                |
| thickness (mm)     | 2.457 ± 0.143 | 2.476 ± 0.132  |
| CoV (vertex based) | 7.594 ± 5.268 | 2.488 ± 0.334* |
| CoV (ROI based)    | 2.873 ± 1.973 | 0.988 ± 0.334* |
| ICC (vertex based) | 0.400 ± 0.208 | 0.894 ± 0.066  |
| ICC (ROI based)    | 0.682         | 0.961          |
| posteriorcingulate |               |                |
| thickness (mm)     | 2.627 ± 0.159 | 2.693 ± 0.135* |
| CoV (vertex based) | 8.836 ± 5.674 | 3.588 ± 1.170* |
| CoV (ROI based)    | 3.289 ± 3.370 | 1.349 ± 0.867  |
| ICC (vertex based) | 0.444 ± 0.175 | 0.772 ± 0.122  |
| ICC (ROI based)    | 0.574         | 0.896          |
| precentral         |               |                |
| thickness (mm)     | 2.729 ± 0.138 | 2.815 ± 0.131* |
| CoV (vertex based) | 7.203 ± 4.766 | 2.377 ± 0.768* |
| CoV (ROI based)    | 3.067 ± 2.060 | 1.160 ± 0.769* |
| ICC (vertex based) | 0.337 ± 0.193 | 0.863 ± 0.095  |
| ICC (ROI based)    | 0.589         | 0.915          |

|                          |               |                |
|--------------------------|---------------|----------------|
| precuneus                |               |                |
| thickness (mm)           | 2.790 ± 0.118 | 2.828 ± 0.116  |
| CoV (vertex based)       | 6.527 ± 4.014 | 2.276 ± 0.580* |
| CoV (ROI based)          | 2.313 ± 1.611 | 0.773 ± 0.350* |
| ICC (vertex based)       | 0.456 ± 0.188 | 0.878 ± 0.074  |
| ICC (ROI based)          | 0.636         | 0.954          |
| rostralanteriorcingulate |               |                |
| thickness (mm)           | 3.208 ± 0.269 | 3.273 ± 0.149  |
| CoV (vertex based)       | 9.348 ± 6.536 | 3.828 ± 1.411* |
| CoV (ROI based)          | 5.211 ± 4.708 | 1.819 ± 1.395* |
| ICC (vertex based)       | 0.398 ± 0.178 | 0.701 ± 0.154  |
| ICC (ROI based)          | 0.549         | 0.770          |
| rostralmiddlefrontal     |               |                |
| thickness (mm)           | 2.883 ± 0.170 | 2.832 ± 0.118  |
| CoV (vertex based)       | 7.405 ± 4.610 | 2.524 ± 0.678* |
| CoV (ROI based)          | 4.417 ± 4.079 | 0.895 ± 0.372* |
| ICC (vertex based)       | 0.381 ± 0.212 | 0.831 ± 0.102  |
| ICC (ROI based)          | 0.336         | 0.944          |
| superiorfrontal          |               |                |
| thickness (mm)           | 3.125 ± 0.185 | 3.162 ± 0.132  |
| CoV (vertex based)       | 7.411 ± 4.911 | 2.691 ± 0.997* |
| CoV (ROI based)          | 3.405 ± 2.433 | 1.201 ± 0.604* |
| ICC (vertex based)       | 0.413 ± 0.185 | 0.833 ± 0.096  |

|                                    |               |                |
|------------------------------------|---------------|----------------|
| ICC (ROI based)                    | 0.621         | 0.899          |
| superiorparietal<br>thickness (mm) | 2.667 ± 0.129 | 2.684 ± 0.136  |
| CoV (vertex based)                 | 7.358 ± 5.163 | 2.042 ± 0.562* |
| CoV (ROI based)                    | 3.035 ± 2.387 | 0.656 ± 0.277* |
| ICC (vertex based)                 | 0.350 ± 0.219 | 0.921 ± 0.046  |
| ICC (ROI based)                    | 0.530         | 0.980          |
| superiortemporal<br>thickness (mm) | 2.951 ± 0.213 | 3.119 ± 0.111* |
| CoV (vertex based)                 | 7.392 ± 6.131 | 2.082 ± 0.590* |
| CoV (ROI based)                    | 4.351 ± 4.889 | 0.795 ± 0.614* |
| ICC (vertex based)                 | 0.405 ± 0.197 | 0.870 ± 0.088  |
| ICC (ROI based)                    | 0.504         | 0.921          |
| supramarginal<br>thickness (mm)    | 2.888 ± 0.127 | 2.968 ± 0.125* |
| CoV (vertex based)                 | 6.375 ± 4.071 | 2.289 ± 0.516* |
| CoV (ROI based)                    | 2.284 ± 1.807 | 0.680 ± 0.338* |
| ICC (vertex based)                 | 0.453 ± 0.213 | 0.887 ± 0.064  |
| ICC (ROI based)                    | 0.654         | 0.966          |
| frontalpole<br>thickness (mm)      | 3.448 ± 0.312 | 3.319 ± 0.201  |
| CoV (vertex based)                 | 6.638 ± 4.972 | 3.274 ± 1.776* |
| CoV (ROI based)                    | 5.156 ± 4.890 | 2.479 ± 1.751  |



|                    |               |                |
|--------------------|---------------|----------------|
| ICC (vertex based) | 0.527 ± 0.124 | 0.724 ± 0.081  |
| ICC (ROI based)    | 0.534         | 0.757          |
| temporalpole       |               |                |
| thickness (mm)     | 3.689 ± 0.247 | 3.888 ± 0.150* |
| CoV (vertex based) | 7.821 ± 5.454 | 2.982 ± 1.100* |
| CoV (ROI based)    | 5.299 ± 4.455 | 1.579 ± 0.905* |
| ICC (vertex based) | 0.275 ± 0.157 | 0.694 ± 0.204  |
| ICC (ROI based)    | 0.390         | 0.795          |
| transversetemporal |               |                |
| thickness (mm)     | 2.696 ± 0.178 | 2.804 ± 0.107* |
| CoV (vertex based) | 6.185 ± 5.427 | 2.219 ± 0.631* |
| CoV (ROI based)    | 4.258 ± 4.655 | 1.265 ± 0.632* |
| ICC (vertex based) | 0.441 ± 0.121 | 0.810 ± 0.091  |
| ICC (ROI based)    | 0.475         | 0.865          |
| insula             |               |                |
| thickness (mm)     | 3.245 ± 0.172 | 3.294 ± 0.113  |
| CoV (vertex based) | 6.970 ± 4.578 | 3.554 ± 0.970* |
| CoV (ROI based)    | 3.239 ± 3.736 | 1.106 ± 0.542  |
| ICC (vertex based) | 0.322 ± 0.193 | 0.625 ± 0.203  |
| ICC (ROI based)    | 0.482         | 0.875          |
