# Supplementary material for: FreeSurfer based cortical mapping and T1-relaxometry with MPnRAGE: Test-retest reliability with and without retrospective motion correction
Source: PubMed Central journal article supplement — Neuroimage. Author manuscript; Available in PMC 2021 Nov 15. (PMC8525331; doi:10.1016/j.neuroimage.2021.118447), 2021-08-03
Supplement: NIHMS1741393-supplement-6.pdf [file NIHMS1741393-supplement-6.pdf]

Supplementary Table 5: Surface area measurements for regions of Destrieux atlas. Coefficients of variation (CoV) are given as % x 100. Statistically significant differences (at  $p < 0.05$  after FDR correction) of the parameter values and associated CoVs between non-motion corrected and motion corrected datasets are given with \*.

|                                |              |              |
|--------------------------------|--------------|--------------|
| G_and_S_frontomargin           |              |              |
| s. area (1e3 mm <sup>2</sup> ) | 0.72 ± 0.13  | 0.80 ± 0.08* |
| CoV                            | 9.63 ± 10.82 | 2.98 ± 1.46  |
| ICC                            | 0.65         | 0.90         |
| G_and_S_occipital_inf          |              |              |
| s. area (1e3 mm <sup>2</sup> ) | 1.04 ± 0.15  | 1.11 ± 0.13* |
| CoV                            | 6.38 ± 10.57 | 2.43 ± 1.41  |
| ICC                            | 0.68         | 0.94         |
| G_and_S_paracentral            |              |              |
| s. area (1e3 mm <sup>2</sup> ) | 1.02 ± 0.10  | 1.05 ± 0.11* |
| CoV                            | 4.51 ± 4.24  | 2.13 ± 0.83  |
| ICC                            | 0.69         | 0.95         |
| G_and_S_subcentral             |              |              |
| s. area (1e3 mm <sup>2</sup> ) | 1.10 ± 0.17  | 1.14 ± 0.15* |
| CoV                            | 3.81 ± 3.32  | 2.17 ± 1.28  |
| ICC                            | 0.91         | 0.97         |
| G_and_S_transv_frontopol       |              |              |
| s. area (1e3 mm <sup>2</sup> ) | 0.63 ± 0.13  | 0.68 ± 0.10* |
| CoV                            | 9.49 ± 8.62  | 2.41 ± 1.07* |
| ICC                            | 0.73         | 0.96         |
| G_and_S_cingul-Ant             |              |              |
| s. area (1e3 mm <sup>2</sup> ) | 1.67 ± 0.33  | 1.83 ± 0.26* |
| CoV                            | 7.79 ± 5.81  | 1.89 ± 0.94* |
| ICC                            | 0.80         | 0.98         |
| G_and_S_cingul-Mid-Ant         |              |              |
| s. area (1e3 mm <sup>2</sup> ) | 0.86 ± 0.13  | 0.93 ± 0.13* |
| CoV                            | 6.92 ± 5.88  | 2.37 ± 1.05* |
| ICC                            | 0.75         | 0.96         |

|                                |             |              |
|--------------------------------|-------------|--------------|
| G_and_S_cingul-Mid-Post        |             |              |
| s. area (1e3 mm <sup>2</sup> ) | 1.00 ± 0.14 | 1.07 ± 0.12* |
| CoV                            | 6.20 ± 7.16 | 1.73 ± 1.23  |
| ICC                            | 0.69        | 0.97         |
| G_cingul-Post-dorsal           |             |              |
| s. area (1e3 mm <sup>2</sup> ) | 0.40 ± 0.06 | 0.43 ± 0.05* |
| CoV                            | 7.54 ± 8.22 | 3.31 ± 2.43  |
| ICC                            | 0.68        | 0.88         |
| G_cingul-Post-ventral          |             |              |
| s. area (1e3 mm <sup>2</sup> ) | 0.22 ± 0.03 | 0.22 ± 0.03  |
| CoV                            | 8.12 ± 6.41 | 2.83 ± 1.30* |
| ICC                            | 0.71        | 0.96         |
| G_cuneus                       |             |              |
| s. area (1e3 mm <sup>2</sup> ) | 1.43 ± 0.23 | 1.57 ± 0.18* |
| CoV                            | 9.29 ± 9.75 | 1.86 ± 1.05* |
| ICC                            | 0.60        | 0.96         |
| G_front_inf-Opercular          |             |              |
| s. area (1e3 mm <sup>2</sup> ) | 0.94 ± 0.12 | 0.97 ± 0.13* |
| CoV                            | 4.97 ± 5.21 | 2.39 ± 1.40  |
| ICC                            | 0.75        | 0.95         |
| G_front_inf-Orbital            |             |              |
| s. area (1e3 mm <sup>2</sup> ) | 0.27 ± 0.04 | 0.29 ± 0.04* |
| CoV                            | 8.17 ± 8.00 | 5.69 ± 2.04  |
| ICC                            | 0.61        | 0.78         |
| G_front_inf-Triangul           |             |              |
| s. area (1e3 mm <sup>2</sup> ) | 0.69 ± 0.12 | 0.71 ± 0.11* |
| CoV                            | 7.54 ± 8.95 | 3.18 ± 1.12  |
| ICC                            | 0.67        | 0.95         |
| G_front_middle                 |             |              |
| s. area (1e3 mm <sup>2</sup> ) | 2.93 ± 0.55 | 3.14 ± 0.46* |
| CoV                            | 8.03 ± 8.61 | 3.04 ± 1.95  |
| ICC                            | 0.76        | 0.94         |

|                                |              |  |              |
|--------------------------------|--------------|--|--------------|
| G_front_sup                    |              |  |              |
| s. area (1e3 mm <sup>2</sup> ) | 4.57 ± 0.70  |  | 5.00 ± 0.54* |
| CoV                            | 7.07 ± 6.67  |  | 1.27 ± 0.93* |
| ICC                            | 0.72         |  | 0.98         |
| G_Ins_lg_and_S_cent_ins        |              |  |              |
| s. area (1e3 mm <sup>2</sup> ) | 0.43 ± 0.07  |  | 0.45 ± 0.06  |
| CoV                            | 8.61 ± 6.01  |  | 5.69 ± 3.50  |
| ICC                            | 0.62         |  | 0.73         |
| G_insular_short                |              |  |              |
| s. area (1e3 mm <sup>2</sup> ) | 0.46 ± 0.09  |  | 0.50 ± 0.06* |
| CoV                            | 12.26 ± 6.95 |  | 6.26 ± 4.85  |
| ICC                            | 0.66         |  | 0.67         |
| G_occipital_middle             |              |  |              |
| s. area (1e3 mm <sup>2</sup> ) | 1.58 ± 0.29  |  | 1.67 ± 0.26* |
| CoV                            | 5.97 ± 5.45  |  | 1.76 ± 0.96* |
| ICC                            | 0.85         |  | 0.98         |
| G_occipital_sup                |              |  |              |
| s. area (1e3 mm <sup>2</sup> ) | 1.03 ± 0.20  |  | 1.08 ± 0.18* |
| CoV                            | 6.36 ± 5.42  |  | 2.10 ± 0.97  |
| ICC                            | 0.85         |  | 0.98         |
| G_oc-temp_lat-fusifor          |              |  |              |
| s. area (1e3 mm <sup>2</sup> ) | 1.21 ± 0.20  |  | 1.31 ± 0.18* |
| CoV                            | 7.50 ± 13.65 |  | 2.34 ± 0.96  |
| ICC                            | 0.59         |  | 0.97         |
| G_oc-temp_med-Lingual          |              |  |              |
| s. area (1e3 mm <sup>2</sup> ) | 1.93 ± 0.41  |  | 2.13 ± 0.26* |
| CoV                            | 9.74 ± 14.59 |  | 1.55 ± 0.81* |
| ICC                            | 0.72         |  | 0.98         |
| G_oc-temp_med-Parahip          |              |  |              |
| s. area (1e3 mm <sup>2</sup> ) | 0.83 ± 0.10  |  | 0.86 ± 0.10  |

|                                |             |              |
|--------------------------------|-------------|--------------|
| CoV                            | 6.33 ± 5.95 | 3.75 ± 2.31  |
| ICC                            | 0.65        | 0.84         |
|                                |             |              |
| G_orbital                      |             |              |
| s. area (1e3 mm <sup>2</sup> ) | 1.68 ± 0.24 | 1.82 ± 0.19* |
| CoV                            | 6.59 ± 5.43 | 1.72 ± 0.70* |
| ICC                            | 0.74        | 0.97         |
|                                |             |              |
| G_pariet_inf-Angular           |             |              |
| s. area (1e3 mm <sup>2</sup> ) | 1.93 ± 0.26 | 2.09 ± 0.20* |
| CoV                            | 6.87 ± 7.52 | 2.28 ± 0.85  |
| ICC                            | 0.65        | 0.93         |
|                                |             |              |
| G_pariet_inf-Supramar          |             |              |
| s. area (1e3 mm <sup>2</sup> ) | 1.89 ± 0.29 | 1.92 ± 0.26  |
| CoV                            | 4.49 ± 4.57 | 1.76 ± 1.13  |
| ICC                            | 0.87        | 0.98         |
|                                |             |              |
| G_parietal_sup                 |             |              |
| s. area (1e3 mm <sup>2</sup> ) | 1.95 ± 0.31 | 2.03 ± 0.21* |
| CoV                            | 8.89 ± 9.03 | 1.75 ± 1.49* |
| ICC                            | 0.61        | 0.95         |
|                                |             |              |
| G_postcentral                  |             |              |
| s. area (1e3 mm <sup>2</sup> ) | 1.43 ± 0.23 | 1.47 ± 0.21  |
| CoV                            | 5.32 ± 9.20 | 1.29 ± 0.90  |
| ICC                            | 0.75        | 0.99         |
|                                |             |              |
| G_precentral                   |             |              |
| s. area (1e3 mm <sup>2</sup> ) | 1.74 ± 0.17 | 1.80 ± 0.14* |
| CoV                            | 6.54 ± 7.13 | 1.49 ± 0.92* |
| ICC                            | 0.44        | 0.95         |
|                                |             |              |
| G_precuneus                    |             |              |
| s. area (1e3 mm <sup>2</sup> ) | 1.89 ± 0.32 | 1.95 ± 0.28* |
| CoV                            | 5.18 ± 4.58 | 1.72 ± 1.04  |
| ICC                            | 0.87        | 0.98         |

|                                |               |               |
|--------------------------------|---------------|---------------|
| G_rectus                       |               |               |
| s. area (1e3 mm <sup>2</sup> ) | 0.62 ± 0.09   | 0.66 ± 0.06*  |
| CoV                            | 9.44 ± 5.91   | 3.54 ± 1.94*  |
| ICC                            | 0.64          | 0.81          |
| G_subcallosal                  |               |               |
| s. area (1e3 mm <sup>2</sup> ) | 0.29 ± 0.11   | 0.29 ± 0.10   |
| CoV                            | 36.31 ± 26.88 | 34.51 ± 16.58 |
| ICC                            | 0.39          | 0.37          |
| G_temp_sup-G_T_transv          |               |               |
| s. area (1e3 mm <sup>2</sup> ) | 0.30 ± 0.05   | 0.31 ± 0.05   |
| CoV                            | 7.38 ± 6.61   | 3.28 ± 1.33   |
| ICC                            | 0.69          | 0.95          |
| G_temp_sup-Lateral             |               |               |
| s. area (1e3 mm <sup>2</sup> ) | 1.30 ± 0.15   | 1.34 ± 0.13*  |
| CoV                            | 4.86 ± 4.49   | 1.47 ± 0.68*  |
| ICC                            | 0.76          | 0.97          |
| G_temp_sup-Plan_polar          |               |               |
| s. area (1e3 mm <sup>2</sup> ) | 0.51 ± 0.07   | 0.57 ± 0.05*  |
| CoV                            | 10.55 ± 8.38  | 4.20 ± 3.13   |
| ICC                            | 0.45          | 0.69          |
| G_temp_sup-Plan_tempo          |               |               |
| s. area (1e3 mm <sup>2</sup> ) | 0.65 ± 0.12   | 0.67 ± 0.11*  |
| CoV                            | 4.81 ± 3.19   | 2.52 ± 1.86   |
| ICC                            | 0.92          | 0.96          |
| G_temporal_inf                 |               |               |
| s. area (1e3 mm <sup>2</sup> ) | 1.69 ± 0.29   | 1.84 ± 0.21*  |
| CoV                            | 8.30 ± 8.23   | 1.60 ± 0.87*  |
| ICC                            | 0.67          | 0.97          |
| G_temporal_middle              |               |               |
| s. area (1e3 mm <sup>2</sup> ) | 1.94 ± 0.30   | 2.06 ± 0.22*  |
| CoV                            | 5.61 ± 5.25   | 1.65 ± 1.12*  |
| ICC                            | 0.81          | 0.97          |

|                                |               |              |
|--------------------------------|---------------|--------------|
| Lat_Fis-ant-Horizont           |               |              |
| s. area (1e3 mm <sup>2</sup> ) | 0.25 ± 0.05   | 0.26 ± 0.05* |
| CoV                            | 8.41 ± 6.88   | 4.06 ± 1.25  |
| ICC                            | 0.82          | 0.94         |
| Lat_Fis-ant-Vertical           |               |              |
| s. area (1e3 mm <sup>2</sup> ) | 0.20 ± 0.05   | 0.22 ± 0.05* |
| CoV                            | 11.46 ± 12.78 | 4.18 ± 2.04  |
| ICC                            | 0.67          | 0.94         |
| Lat_Fis-post                   |               |              |
| s. area (1e3 mm <sup>2</sup> ) | 0.85 ± 0.07   | 0.85 ± 0.07  |
| CoV                            | 3.61 ± 3.37   | 1.66 ± 0.75  |
| ICC                            | 0.72          | 0.94         |
| Pole_occipital                 |               |              |
| s. area (1e3 mm <sup>2</sup> ) | 1.83 ± 0.28   | 1.90 ± 0.22* |
| CoV                            | 5.96 ± 6.58   | 1.47 ± 1.05* |
| ICC                            | 0.80          | 0.98         |
| Pole_temporal                  |               |              |
| s. area (1e3 mm <sup>2</sup> ) | 1.15 ± 0.13   | 1.20 ± 0.12* |
| CoV                            | 4.92 ± 4.60   | 1.73 ± 0.91  |
| ICC                            | 0.76          | 0.96         |
| S_calcarine                    |               |              |
| s. area (1e3 mm <sup>2</sup> ) | 1.67 ± 0.35   | 1.86 ± 0.28* |
| CoV                            | 10.53 ± 11.63 | 1.53 ± 0.64* |
| ICC                            | 0.66          | 0.99         |
| S_central                      |               |              |
| s. area (1e3 mm <sup>2</sup> ) | 1.97 ± 0.21   | 2.08 ± 0.13* |
| CoV                            | 8.49 ± 11.38  | 0.76 ± 0.45* |
| ICC                            | 0.32          | 0.98         |
| S_cingul-Marginalis            |               |              |
| s. area (1e3 mm <sup>2</sup> ) | 0.84 ± 0.13   | 0.90 ± 0.09* |
| CoV                            | 8.09 ± 6.64   | 2.04 ± 0.82  |

|                                |               |              |
|--------------------------------|---------------|--------------|
| ICC                            | 0.70          | 0.95         |
| S_circular_insula_ant          |               |              |
| s. area (1e3 mm <sup>2</sup> ) | 0.37 ± 0.07   | 0.39 ± 0.06* |
| CoV                            | 6.83 ± 5.89   | 2.52 ± 1.79* |
| ICC                            | 0.78          | 0.96         |
| S_circular_insula_inf          |               |              |
| s. area (1e3 mm <sup>2</sup> ) | 0.84 ± 0.08   | 0.86 ± 0.08  |
| CoV                            | 4.32 ± 4.33   | 1.85 ± 1.06  |
| ICC                            | 0.71          | 0.94         |
| S_circular_insula_sup          |               |              |
| s. area (1e3 mm <sup>2</sup> ) | 1.05 ± 0.15   | 1.08 ± 0.14* |
| CoV                            | 3.59 ± 2.60   | 2.27 ± 1.30  |
| ICC                            | 0.90          | 0.96         |
| S_collat_transv_ant            |               |              |
| s. area (1e3 mm <sup>2</sup> ) | 0.71 ± 0.10   | 0.77 ± 0.10* |
| CoV                            | 7.93 ± 6.82   | 2.78 ± 1.47  |
| ICC                            | 0.65          | 0.93         |
| S_collat_transv_post           |               |              |
| s. area (1e3 mm <sup>2</sup> ) | 0.32 ± 0.06   | 0.36 ± 0.04* |
| CoV                            | 11.62 ± 15.78 | 3.99 ± 1.57  |
| ICC                            | 0.65          | 0.86         |
| S_front_inf                    |               |              |
| s. area (1e3 mm <sup>2</sup> ) | 1.43 ± 0.21   | 1.52 ± 0.16* |
| CoV                            | 7.14 ± 7.85   | 1.85 ± 2.53* |
| ICC                            | 0.71          | 0.92         |
| S_front_middle                 |               |              |
| s. area (1e3 mm <sup>2</sup> ) | 1.23 ± 0.29   | 1.37 ± 0.22* |
| CoV                            | 11.60 ± 7.62  | 4.23 ± 3.10* |
| ICC                            | 0.74          | 0.90         |
| S_front_sup                    |               |              |

|                                |               |              |
|--------------------------------|---------------|--------------|
| s. area (1e3 mm <sup>2</sup> ) | 1.85 ± 0.37   | 2.01 ± 0.32* |
| CoV                            | 7.19 ± 6.53   | 1.93 ± 1.36  |
| ICC                            | 0.82          | 0.98         |
| S_interm_prim-Jensen           |               |              |
| s. area (1e3 mm <sup>2</sup> ) | 0.29 ± 0.10   | 0.32 ± 0.09* |
| CoV                            | 17.22 ± 19.32 | 4.50 ± 2.86  |
| ICC                            | 0.72          | 0.97         |
| S_intrapariet_and_P_trans      |               |              |
| s. area (1e3 mm <sup>2</sup> ) | 2.17 ± 0.47   | 2.37 ± 0.31* |
| CoV                            | 9.36 ± 8.27   | 1.56 ± 1.16* |
| ICC                            | 0.80          | 0.98         |
| S_oc_middle_and_Lunatus        |               |              |
| s. area (1e3 mm <sup>2</sup> ) | 0.68 ± 0.15   | 0.75 ± 0.10* |
| CoV                            | 9.88 ± 12.43  | 2.51 ± 1.77* |
| ICC                            | 0.78          | 0.94         |
| S_oc_sup_and_transversal       |               |              |
| s. area (1e3 mm <sup>2</sup> ) | 0.90 ± 0.18   | 0.99 ± 0.18* |
| CoV                            | 11.19 ± 9.23  | 2.02 ± 0.94* |
| ICC                            | 0.67          | 0.98         |
| S_occipital_ant                |               |              |
| s. area (1e3 mm <sup>2</sup> ) | 0.52 ± 0.09   | 0.57 ± 0.08  |
| CoV                            | 12.52 ± 15.18 | 3.16 ± 2.16  |
| ICC                            | 0.39          | 0.93         |
| S_oc-temp_lat                  |               |              |
| s. area (1e3 mm <sup>2</sup> ) | 0.69 ± 0.13   | 0.76 ± 0.11* |
| CoV                            | 9.38 ± 8.51   | 3.24 ± 2.24  |
| ICC                            | 0.67          | 0.92         |
| S_oc-temp_med_and_Lingual      |               |              |
| s. area (1e3 mm <sup>2</sup> ) | 1.38 ± 0.25   | 1.50 ± 0.14* |
| CoV                            | 8.48 ± 10.91  | 2.00 ± 1.05* |
| ICC                            | 0.72          | 0.94         |



|                                |               |              |
|--------------------------------|---------------|--------------|
| S_orbital_lateral              |               |              |
| s. area (1e3 mm <sup>2</sup> ) | 0.28 ± 0.08   | 0.32 ± 0.05* |
| CoV                            | 16.72 ± 16.30 | 6.87 ± 5.35  |
| ICC                            | 0.63          | 0.72         |
| <br>                           |               |              |
| S_orbital_med-olfact           |               |              |
| s. area (1e3 mm <sup>2</sup> ) | 0.45 ± 0.12   | 0.52 ± 0.10* |
| CoV                            | 16.10 ± 13.88 | 5.36 ± 2.77* |
| ICC                            | 0.63          | 0.89         |
| <br>                           |               |              |
| S_orbital-H_Shaped             |               |              |
| s. area (1e3 mm <sup>2</sup> ) | 0.97 ± 0.18   | 1.08 ± 0.11* |
| CoV                            | 9.56 ± 10.30  | 2.43 ± 2.09* |
| ICC                            | 0.69          | 0.92         |
| <br>                           |               |              |
| S_parieto_occipital            |               |              |
| s. area (1e3 mm <sup>2</sup> ) | 1.53 ± 0.23   | 1.70 ± 0.22* |
| CoV                            | 9.91 ± 10.37  | 1.54 ± 0.89  |
| ICC                            | 0.51          | 0.98         |
| <br>                           |               |              |
| S_pericallosal                 |               |              |
| s. area (1e3 mm <sup>2</sup> ) | 0.89 ± 0.17   | 0.98 ± 0.14* |
| CoV                            | 7.35 ± 7.25   | 1.73 ± 1.02* |
| ICC                            | 0.77          | 0.98         |
| <br>                           |               |              |
| S_postcentral                  |               |              |
| s. area (1e3 mm <sup>2</sup> ) | 1.76 ± 0.36   | 1.90 ± 0.30* |
| CoV                            | 9.94 ± 10.58  | 1.52 ± 1.11* |
| ICC                            | 0.70          | 0.99         |
| <br>                           |               |              |
| S_precentral-inf-part          |               |              |
| s. area (1e3 mm <sup>2</sup> ) | 1.26 ± 0.19   | 1.35 ± 0.13* |
| CoV                            | 7.79 ± 8.84   | 1.51 ± 0.39* |
| ICC                            | 0.68          | 0.97         |
| <br>                           |               |              |
| S_precentral-sup-part          |               |              |
| s. area (1e3 mm <sup>2</sup> ) | 0.89 ± 0.15   | 0.94 ± 0.13* |
| CoV                            | 12.80 ± 15.00 | 3.01 ± 1.13  |
| ICC                            | 0.37          | 0.95         |

|                                |               |              |
|--------------------------------|---------------|--------------|
| S_suborbital                   |               |              |
| s. area (1e3 mm <sup>2</sup> ) | 0.31 ± 0.09   | 0.36 ± 0.07* |
| CoV                            | 14.30 ± 9.91  | 6.29 ± 4.32* |
| ICC                            | 0.69          | 0.89         |
|                                |               |              |
| S_subparietal                  |               |              |
| s. area (1e3 mm <sup>2</sup> ) | 0.75 ± 0.20   | 0.82 ± 0.16* |
| CoV                            | 11.11 ± 9.95  | 2.50 ± 1.10* |
| ICC                            | 0.83          | 0.98         |
|                                |               |              |
| S_temporal_inf                 |               |              |
| s. area (1e3 mm <sup>2</sup> ) | 1.02 ± 0.24   | 1.15 ± 0.14* |
| CoV                            | 12.42 ± 10.94 | 3.12 ± 1.85  |
| ICC                            | 0.70          | 0.92         |
|                                |               |              |
| S_temporal_sup                 |               |              |
| s. area (1e3 mm <sup>2</sup> ) | 4.02 ± 0.59   | 4.38 ± 0.47* |
| CoV                            | 7.45 ± 7.66   | 1.27 ± 0.46* |
| ICC                            | 0.65          | 0.98         |
|                                |               |              |
| S_temporal_transverse          |               |              |
| s. area (1e3 mm <sup>2</sup> ) | 0.25 ± 0.04   | 0.26 ± 0.05* |
| CoV                            | 9.57 ± 7.27   | 4.47 ± 1.77* |
| ICC                            | 0.67          | 0.94         |
