# Supplementary material for: FreeSurfer based cortical mapping and T1-relaxometry with MPnRAGE: Test-retest reliability with and without retrospective motion correction
Source: PubMed Central journal article supplement — Neuroimage. Author manuscript; Available in PMC 2021 Nov 15. (PMC8525331; doi:10.1016/j.neuroimage.2021.118447), 2021-08-03
Supplement: NIHMS1741393-supplement-7.pdf [file NIHMS1741393-supplement-7.pdf]

Supplementary Table 6: Surface area measurements for regions of DK atlas. Coefficients of variation (CoV) are given as % x 100. Statistically significant differences (at  $p < 0.05$  after FDR correction) of the parameter values and associated CoVs between non-motion corrected and motion corrected datasets are given with \*.

|                                |              |              |
|--------------------------------|--------------|--------------|
| bankssts                       |              |              |
| s. area (1e3 mm <sup>2</sup> ) | 0.92 ± 0.14  | 0.99 ± 0.11* |
| CoV                            | 6.06 ± 6.21  | 1.53 ± 0.89  |
| ICC                            | 0.75         | 0.97         |
| caudalanteriorcingulate        |              |              |
| s. area (1e3 mm <sup>2</sup> ) | 0.63 ± 0.11  | 0.70 ± 0.11* |
| CoV                            | 8.36 ± 9.17  | 1.76 ± 1.24  |
| ICC                            | 0.68         | 0.98         |
| caudalmiddlefrontal            |              |              |
| s. area (1e3 mm <sup>2</sup> ) | 2.37 ± 0.49  | 2.51 ± 0.44* |
| CoV                            | 6.85 ± 7.30  | 0.96 ± 0.78* |
| ICC                            | 0.85         | 1.00         |
| cuneus                         |              |              |
| s. area (1e3 mm <sup>2</sup> ) | 1.53 ± 0.25  | 1.68 ± 0.19* |
| CoV                            | 9.81 ± 10.12 | 1.23 ± 0.65* |
| ICC                            | 0.57         | 0.98         |
| entorhinal                     |              |              |
| s. area (1e3 mm <sup>2</sup> ) | 0.44 ± 0.07  | 0.45 ± 0.07  |
| CoV                            | 6.19 ± 5.09  | 4.26 ± 2.62  |
| ICC                            | 0.79         | 0.89         |
| fusiform                       |              |              |
| s. area (1e3 mm <sup>2</sup> ) | 2.95 ± 0.45  | 3.20 ± 0.37* |
| CoV                            | 7.12 ± 10.56 | 0.85 ± 0.60* |
| ICC                            | 0.63         | 0.99         |
| inferiorparietal               |              |              |
| s. area (1e3 mm <sup>2</sup> ) | 4.89 ± 0.78  | 5.34 ± 0.59* |
| CoV                            | 7.04 ± 7.79  | 0.92 ± 0.39* |
| ICC                            | 0.72         | 0.99         |

|                                |              |              |
|--------------------------------|--------------|--------------|
| inferiortemporal               |              |              |
| s. area (1e3 mm <sup>2</sup> ) | 3.24 ± 0.52  | 3.56 ± 0.36* |
| CoV                            | 8.24 ± 8.31  | 1.28 ± 0.45* |
| ICC                            | 0.65         | 0.98         |
| isthmuscingulate               |              |              |
| s. area (1e3 mm <sup>2</sup> ) | 0.97 ± 0.12  | 1.03 ± 0.09* |
| CoV                            | 5.33 ± 6.81  | 1.43 ± 0.86  |
| ICC                            | 0.72         | 0.96         |
| lateraloccipital               |              |              |
| s. area (1e3 mm <sup>2</sup> ) | 5.10 ± 0.78  | 5.41 ± 0.55* |
| CoV                            | 5.68 ± 8.30  | 0.81 ± 0.49* |
| ICC                            | 0.77         | 0.99         |
| lateralorbitofrontal           |              |              |
| s. area (1e3 mm <sup>2</sup> ) | 2.54 ± 0.42  | 2.78 ± 0.29* |
| CoV                            | 8.08 ± 8.67  | 2.08 ± 1.69  |
| ICC                            | 0.68         | 0.94         |
| lingual                        |              |              |
| s. area (1e3 mm <sup>2</sup> ) | 2.97 ± 0.57  | 3.29 ± 0.35* |
| CoV                            | 9.49 ± 13.62 | 1.37 ± 0.48* |
| ICC                            | 0.68         | 0.98         |
| medialorbitofrontal            |              |              |
| s. area (1e3 mm <sup>2</sup> ) | 1.83 ± 0.35  | 2.01 ± 0.23* |
| CoV                            | 9.66 ± 8.09  | 3.54 ± 1.82* |
| ICC                            | 0.71         | 0.89         |
| middletemporal                 |              |              |
| s. area (1e3 mm <sup>2</sup> ) | 3.36 ± 0.54  | 3.64 ± 0.36* |
| CoV                            | 6.65 ± 6.18  | 0.89 ± 0.47* |
| ICC                            | 0.77         | 0.99         |
| parahippocampal                |              |              |
| s. area (1e3 mm <sup>2</sup> ) | 0.63 ± 0.06  | 0.65 ± 0.05  |
| CoV                            | 4.85 ± 7.04  | 2.38 ± 1.13  |
| ICC                            | 0.63         | 0.86         |

|                                |               |              |
|--------------------------------|---------------|--------------|
| paracentral                    |               |              |
| s. area (1e3 mm <sup>2</sup> ) | 1.45 ± 0.16   | 1.52 ± 0.14* |
| CoV                            | 5.55 ± 5.75   | 0.98 ± 0.61  |
| ICC                            | 0.66          | 0.98         |
| parsopercularis                |               |              |
| s. area (1e3 mm <sup>2</sup> ) | 1.49 ± 0.19   | 1.56 ± 0.19* |
| CoV                            | 4.64 ± 4.85   | 1.39 ± 0.37* |
| ICC                            | 0.77          | 0.99         |
| parsorbitalis                  |               |              |
| s. area (1e3 mm <sup>2</sup> ) | 0.74 ± 0.11   | 0.81 ± 0.07* |
| CoV                            | 7.80 ± 6.84   | 1.53 ± 0.85* |
| ICC                            | 0.65          | 0.96         |
| parstriangularis               |               |              |
| s. area (1e3 mm <sup>2</sup> ) | 1.40 ± 0.23   | 1.47 ± 0.21* |
| CoV                            | 6.35 ± 7.39   | 1.51 ± 0.86* |
| ICC                            | 0.76          | 0.99         |
| pericalcarine                  |               |              |
| s. area (1e3 mm <sup>2</sup> ) | 1.42 ± 0.29   | 1.57 ± 0.21* |
| CoV                            | 10.67 ± 10.86 | 1.33 ± 0.84* |
| ICC                            | 0.68          | 0.99         |
| postcentral                    |               |              |
| s. area (1e3 mm <sup>2</sup> ) | 4.01 ± 0.58   | 4.23 ± 0.49* |
| CoV                            | 5.35 ± 8.45   | 0.57 ± 0.22* |
| ICC                            | 0.72          | 1.00         |
| posteriorcingulate             |               |              |
| s. area (1e3 mm <sup>2</sup> ) | 1.24 ± 0.21   | 1.34 ± 0.16* |
| CoV                            | 6.48 ± 6.14   | 1.55 ± 1.08* |
| ICC                            | 0.81          | 0.98         |
| precentral                     |               |              |
| s. area (1e3 mm <sup>2</sup> ) | 4.89 ± 0.49   | 5.09 ± 0.36* |

|                                |               |              |
|--------------------------------|---------------|--------------|
| CoV                            | 6.22 ± 7.89   | 0.54 ± 0.42* |
| ICC                            | 0.46          | 0.99         |
| precuneus                      |               |              |
| s. area (1e3 mm <sup>2</sup> ) | 3.97 ± 0.63   | 4.25 ± 0.44* |
| CoV                            | 7.22 ± 6.84   | 0.82 ± 0.54* |
| ICC                            | 0.76          | 0.99         |
| rostralanteriorcingulate       |               |              |
| s. area (1e3 mm <sup>2</sup> ) | 0.60 ± 0.14   | 0.69 ± 0.11* |
| CoV                            | 12.68 ± 10.72 | 2.65 ± 1.60* |
| ICC                            | 0.67          | 0.96         |
| rostralmiddlefrontal           |               |              |
| s. area (1e3 mm <sup>2</sup> ) | 5.50 ± 1.02   | 6.03 ± 0.71* |
| CoV                            | 8.43 ± 9.22   | 1.48 ± 1.60* |
| ICC                            | 0.73          | 0.97         |
| superiorfrontal                |               |              |
| s. area (1e3 mm <sup>2</sup> ) | 6.87 ± 1.10   | 7.47 ± 0.85* |
| CoV                            | 6.81 ± 6.66   | 0.81 ± 0.59* |
| ICC                            | 0.75          | 0.99         |
| superiorparietal               |               |              |
| s. area (1e3 mm <sup>2</sup> ) | 5.43 ± 0.83   | 5.77 ± 0.55* |
| CoV                            | 7.13 ± 6.80   | 0.64 ± 0.49* |
| ICC                            | 0.74          | 0.99         |
| superiortemporal               |               |              |
| s. area (1e3 mm <sup>2</sup> ) | 3.76 ± 0.45   | 3.95 ± 0.36* |
| CoV                            | 5.03 ± 5.49   | 0.72 ± 0.38* |
| ICC                            | 0.73          | 0.99         |
| supramarginal                  |               |              |
| s. area (1e3 mm <sup>2</sup> ) | 3.84 ± 0.58   | 4.00 ± 0.43* |
| CoV                            | 4.67 ± 5.50   | 1.11 ± 0.48* |
| ICC                            | 0.85          | 0.99         |

|                                |             |              |
|--------------------------------|-------------|--------------|
| frontalpole                    |             |              |
| s. area (1e3 mm <sup>2</sup> ) | 0.29 ± 0.03 | 0.30 ± 0.02  |
| CoV                            | 6.18 ± 3.74 | 3.15 ± 1.91* |
| ICC                            | 0.59        | 0.76         |
| temporalpole                   |             |              |
| s. area (1e3 mm <sup>2</sup> ) | 0.47 ± 0.04 | 0.47 ± 0.04  |
| CoV                            | 5.60 ± 2.99 | 2.48 ± 1.13* |
| ICC                            | 0.47        | 0.88         |
| transversetemporal             |             |              |
| s. area (1e3 mm <sup>2</sup> ) | 0.39 ± 0.04 | 0.41 ± 0.05* |
| CoV                            | 4.70 ± 4.27 | 1.96 ± 1.06  |
| ICC                            | 0.73        | 0.95         |
| insula                         |             |              |
| s. area (1e3 mm <sup>2</sup> ) | 2.18 ± 0.30 | 2.28 ± 0.25* |
| CoV                            | 3.72 ± 3.17 | 3.44 ± 2.22  |
| ICC                            | 0.90        | 0.84         |
