# Supplementary material for: FreeSurfer based cortical mapping and T1-relaxometry with MPnRAGE: Test-retest reliability with and without retrospective motion correction
Source: PubMed Central journal article supplement — Neuroimage. Author manuscript; Available in PMC 2021 Nov 15. (PMC8525331; doi:10.1016/j.neuroimage.2021.118447), 2021-08-03
Supplement: NIHMS1741393-supplement-8.pdf [file NIHMS1741393-supplement-8.pdf]

Supplementary Table 7: Volume measurements for regions of Destrieux atlas. Coefficients of variation (CoV) are given as % x 100. Statistically significant differences (at  $p < 0.05$  after FDR correction) of the parameter values and associated CoVs between non-motion corrected and motion corrected datasets are given with \*.

|                               |               |              |
|-------------------------------|---------------|--------------|
| G_and_S_frontomargin          |               |              |
| volume (1e3 mm <sup>3</sup> ) | 2.77 ± 0.42   | 2.86 ± 0.23  |
| CoV                           | 9.03 ± 12.31  | 3.12 ± 1.50  |
| ICC                           | 0.46          | 0.83         |
| G_and_S_occipital_inf         |               |              |
| volume (1e3 mm <sup>3</sup> ) | 4.07 ± 0.58   | 4.14 ± 0.48  |
| CoV                           | 5.34 ± 6.73   | 2.83 ± 1.81  |
| ICC                           | 0.78          | 0.92         |
| G_and_S_paracentral           |               |              |
| volume (1e3 mm <sup>3</sup> ) | 3.62 ± 0.37   | 3.80 ± 0.40* |
| CoV                           | 6.10 ± 5.48   | 2.19 ± 0.99* |
| ICC                           | 0.57          | 0.95         |
| G_and_S_subcentral            |               |              |
| volume (1e3 mm <sup>3</sup> ) | 3.96 ± 0.57   | 4.14 ± 0.57* |
| CoV                           | 4.51 ± 3.80   | 2.60 ± 1.16  |
| ICC                           | 0.86          | 0.96         |
| G_and_S_transv_frontopol      |               |              |
| volume (1e3 mm <sup>3</sup> ) | 3.09 ± 0.47   | 3.09 ± 0.30  |
| CoV                           | 10.64 ± 10.08 | 3.17 ± 1.16  |
| ICC                           | 0.44          | 0.88         |
| G_and_S_cingul-Ant            |               |              |
| volume (1e3 mm <sup>3</sup> ) | 5.73 ± 1.19   | 6.19 ± 0.75  |
| CoV                           | 9.59 ± 10.81  | 2.77 ± 1.72* |
| ICC                           | 0.73          | 0.93         |
| G_and_S_cingul-Mid-Ant        |               |              |
| volume (1e3 mm <sup>3</sup> ) | 2.72 ± 0.50   | 3.05 ± 0.40* |
| CoV                           | 10.19 ± 9.66  | 2.64 ± 1.88* |
| ICC                           | 0.68          | 0.95         |

|                               |               |               |
|-------------------------------|---------------|---------------|
| G_and_S_cingul-Mid-Post       |               |               |
| volume (1e3 mm <sup>3</sup> ) | 2.99 ± 0.51   | 3.32 ± 0.34*  |
| CoV                           | 10.26 ± 9.65  | 2.20 ± 1.84*  |
| ICC                           | 0.62          | 0.93          |
| G_cingul-Post-dorsal          |               |               |
| volume (1e3 mm <sup>3</sup> ) | 1.84 ± 0.35   | 2.04 ± 0.21*  |
| CoV                           | 11.19 ± 10.23 | 3.07 ± 1.62*  |
| ICC                           | 0.63          | 0.89          |
| G_cingul-Post-ventral         |               |               |
| volume (1e3 mm <sup>3</sup> ) | 0.97 ± 0.18   | 0.97 ± 0.16   |
| CoV                           | 7.63 ± 8.12   | 4.10 ± 2.26   |
| ICC                           | 0.79          | 0.92          |
| G_cuneus                      |               |               |
| volume (1e3 mm <sup>3</sup> ) | 4.18 ± 0.54   | 4.22 ± 0.53   |
| CoV                           | 5.29 ± 5.12   | 2.08 ± 1.14*  |
| ICC                           | 0.75          | 0.96          |
| G_front_inf-Opercular         |               |               |
| volume (1e3 mm <sup>3</sup> ) | 3.89 ± 0.54   | 4.14 ± 0.50*  |
| CoV                           | 5.73 ± 5.26   | 2.05 ± 1.55*  |
| ICC                           | 0.78          | 0.96          |
| G_front_inf-Orbital           |               |               |
| volume (1e3 mm <sup>3</sup> ) | 1.34 ± 0.17   | 1.40 ± 0.13   |
| CoV                           | 10.14 ± 8.35  | 5.17 ± 2.30   |
| ICC                           | 0.40          | 0.68          |
| G_front_inf-Triangul          |               |               |
| volume (1e3 mm <sup>3</sup> ) | 3.10 ± 0.43   | 3.22 ± 0.46   |
| CoV                           | 8.82 ± 11.10  | 2.69 ± 1.29   |
| ICC                           | 0.37          | 0.96          |
| G_front_middle                |               |               |
| volume (1e3 mm <sup>3</sup> ) | 12.74 ± 2.78  | 13.77 ± 2.20* |
| CoV                           | 9.53 ± 10.20  | 3.63 ± 2.30   |
| ICC                           | 0.78          | 0.93          |

|                               |               |  |               |
|-------------------------------|---------------|--|---------------|
| G_front_sup                   |               |  |               |
| volume (1e3 mm <sup>3</sup> ) | 20.14 ± 3.16  |  | 22.05 ± 2.16* |
| CoV                           | 8.60 ± 9.07   |  | 1.14 ± 0.77*  |
| ICC                           | 0.64          |  | 0.98          |
| <br>                          |               |  |               |
| G_Ins_lg_and_S_cent_ins       |               |  |               |
| volume (1e3 mm <sup>3</sup> ) | 1.68 ± 0.25   |  | 1.77 ± 0.20   |
| CoV                           | 10.25 ± 7.30  |  | 5.84 ± 2.01   |
| ICC                           | 0.51          |  | 0.74          |
| <br>                          |               |  |               |
| G_insular_short               |               |  |               |
| volume (1e3 mm <sup>3</sup> ) | 2.47 ± 0.42   |  | 2.70 ± 0.24*  |
| CoV                           | 12.68 ± 11.80 |  | 5.05 ± 3.63   |
| ICC                           | 0.49          |  | 0.59          |
| <br>                          |               |  |               |
| G_occipital_middle            |               |  |               |
| volume (1e3 mm <sup>3</sup> ) | 6.75 ± 1.27   |  | 7.01 ± 1.20*  |
| CoV                           | 5.83 ± 4.20   |  | 1.23 ± 0.66*  |
| ICC                           | 0.88          |  | 0.99          |
| <br>                          |               |  |               |
| G_occipital_sup               |               |  |               |
| volume (1e3 mm <sup>3</sup> ) | 3.48 ± 0.71   |  | 3.63 ± 0.70*  |
| CoV                           | 6.64 ± 7.28   |  | 1.96 ± 0.92   |
| ICC                           | 0.81          |  | 0.99          |
| <br>                          |               |  |               |
| G_oc-temp_lat-fusifor         |               |  |               |
| volume (1e3 mm <sup>3</sup> ) | 5.41 ± 0.84   |  | 5.69 ± 0.72   |
| CoV                           | 9.63 ± 16.82  |  | 2.95 ± 1.20   |
| ICC                           | 0.46          |  | 0.93          |
| <br>                          |               |  |               |
| G_oc-temp_med-Lingual         |               |  |               |
| volume (1e3 mm <sup>3</sup> ) | 6.10 ± 0.93   |  | 6.19 ± 0.70   |
| CoV                           | 6.38 ± 11.34  |  | 1.67 ± 1.00   |
| ICC                           | 0.70          |  | 0.97          |
| <br>                          |               |  |               |
| G_oc-temp_med-Parahip         |               |  |               |
| volume (1e3 mm <sup>3</sup> ) | 3.70 ± 0.50   |  | 3.93 ± 0.47*  |

|                               |              |              |
|-------------------------------|--------------|--------------|
| CoV                           | 8.60 ± 11.01 | 3.71 ± 2.38  |
| ICC                           | 0.53         | 0.84         |
|                               |              |              |
| G_orbital                     |              |              |
| volume (1e3 mm <sup>3</sup> ) | 7.87 ± 0.81  | 8.58 ± 0.57* |
| CoV                           | 7.83 ± 7.38  | 1.91 ± 0.79* |
| ICC                           | 0.41         | 0.91         |
|                               |              |              |
| G_pariet_inf-Angular          |              |              |
| volume (1e3 mm <sup>3</sup> ) | 8.45 ± 1.19  | 9.33 ± 0.96* |
| CoV                           | 8.34 ± 8.44  | 2.10 ± 1.17* |
| ICC                           | 0.58         | 0.94         |
|                               |              |              |
| G_pariet_inf-Supramar         |              |              |
| volume (1e3 mm <sup>3</sup> ) | 7.69 ± 1.29  | 8.05 ± 1.18* |
| CoV                           | 5.32 ± 4.69  | 1.69 ± 0.87  |
| ICC                           | 0.86         | 0.98         |
|                               |              |              |
| G_parietal_sup                |              |              |
| volume (1e3 mm <sup>3</sup> ) | 7.43 ± 1.14  | 7.92 ± 0.87* |
| CoV                           | 9.43 ± 9.12  | 1.74 ± 1.04* |
| ICC                           | 0.56         | 0.97         |
|                               |              |              |
| G_postcentral                 |              |              |
| volume (1e3 mm <sup>3</sup> ) | 4.76 ± 0.98  | 5.07 ± 0.95* |
| CoV                           | 7.18 ± 7.84  | 2.07 ± 1.02* |
| ICC                           | 0.80         | 0.98         |
|                               |              |              |
| G_precentral                  |              |              |
| volume (1e3 mm <sup>3</sup> ) | 7.08 ± 1.01  | 7.70 ± 0.84* |
| CoV                           | 9.80 ± 9.28  | 1.71 ± 0.79* |
| ICC                           | 0.50         | 0.97         |
|                               |              |              |
| G_precuneus                   |              |              |
| volume (1e3 mm <sup>3</sup> ) | 7.60 ± 1.33  | 8.00 ± 1.15* |
| CoV                           | 6.99 ± 6.23  | 1.99 ± 1.36  |
| ICC                           | 0.80         | 0.97         |

|                               |               |  |               |
|-------------------------------|---------------|--|---------------|
| G_rectus                      |               |  |               |
| volume (1e3 mm <sup>3</sup> ) | 2.89 ± 0.41   |  | 3.08 ± 0.30   |
| CoV                           | 9.96 ± 8.32   |  | 3.59 ± 1.86   |
| ICC                           | 0.52          |  | 0.83          |
|                               |               |  |               |
| G_subcallosal                 |               |  |               |
| volume (1e3 mm <sup>3</sup> ) | 0.85 ± 0.34   |  | 0.93 ± 0.32   |
| CoV                           | 34.49 ± 31.34 |  | 27.02 ± 14.00 |
| ICC                           | 0.49          |  | 0.54          |
|                               |               |  |               |
| G_temp_sup-G_T_transv         |               |  |               |
| volume (1e3 mm <sup>3</sup> ) | 1.08 ± 0.17   |  | 1.14 ± 0.16*  |
| CoV                           | 10.42 ± 12.80 |  | 3.79 ± 1.81   |
| ICC                           | 0.47          |  | 0.91          |
|                               |               |  |               |
| G_temp_sup-Lateral            |               |  |               |
| volume (1e3 mm <sup>3</sup> ) | 6.27 ± 0.96   |  | 6.83 ± 0.54*  |
| CoV                           | 8.93 ± 9.17   |  | 1.50 ± 1.26*  |
| ICC                           | 0.61          |  | 0.94          |
|                               |               |  |               |
| G_temp_sup-Plan_polar         |               |  |               |
| volume (1e3 mm <sup>3</sup> ) | 2.05 ± 0.34   |  | 2.35 ± 0.23*  |
| CoV                           | 13.83 ± 12.31 |  | 3.78 ± 2.28   |
| ICC                           | 0.41          |  | 0.82          |
|                               |               |  |               |
| G_temp_sup-Plan_tempo         |               |  |               |
| volume (1e3 mm <sup>3</sup> ) | 2.10 ± 0.40   |  | 2.25 ± 0.35*  |
| CoV                           | 7.72 ± 8.29   |  | 3.04 ± 2.21   |
| ICC                           | 0.76          |  | 0.93          |
|                               |               |  |               |
| G_temporal_inf                |               |  |               |
| volume (1e3 mm <sup>3</sup> ) | 8.03 ± 1.61   |  | 9.00 ± 0.94*  |
| CoV                           | 11.02 ± 12.54 |  | 2.08 ± 1.66*  |
| ICC                           | 0.65          |  | 0.94          |
|                               |               |  |               |
| G_temporal_middle             |               |  |               |
| volume (1e3 mm <sup>3</sup> ) | 9.82 ± 1.58   |  | 10.70 ± 1.12* |
| CoV                           | 7.95 ± 8.66   |  | 1.30 ± 0.80*  |
| ICC                           | 0.69          |  | 0.98          |

|                               |               |              |
|-------------------------------|---------------|--------------|
| Lat_Fis-ant-Horizont          |               |              |
| volume (1e3 mm <sup>3</sup> ) | 0.60 ± 0.15   | 0.62 ± 0.13  |
| CoV                           | 11.47 ± 7.93  | 5.34 ± 1.67* |
| ICC                           | 0.79          | 0.94         |
| Lat_Fis-ant-Vertical          |               |              |
| volume (1e3 mm <sup>3</sup> ) | 0.48 ± 0.13   | 0.54 ± 0.11* |
| CoV                           | 13.80 ± 14.09 | 5.04 ± 2.37  |
| ICC                           | 0.68          | 0.91         |
| Lat_Fis-post                  |               |              |
| volume (1e3 mm <sup>3</sup> ) | 1.90 ± 0.21   | 1.94 ± 0.21  |
| CoV                           | 5.77 ± 4.52   | 1.88 ± 0.99* |
| ICC                           | 0.65          | 0.95         |
| Pole_occipital                |               |              |
| volume (1e3 mm <sup>3</sup> ) | 5.00 ± 0.69   | 4.93 ± 0.69  |
| CoV                           | 5.39 ± 3.47   | 2.06 ± 1.23* |
| ICC                           | 0.81          | 0.97         |
| Pole_temporal                 |               |              |
| volume (1e3 mm <sup>3</sup> ) | 6.05 ± 0.84   | 6.49 ± 0.62* |
| CoV                           | 6.58 ± 6.25   | 2.41 ± 1.87  |
| ICC                           | 0.71          | 0.90         |
| S_calcarine                   |               |              |
| volume (1e3 mm <sup>3</sup> ) | 3.54 ± 0.48   | 3.68 ± 0.46* |
| CoV                           | 6.78 ± 7.78   | 2.22 ± 1.25  |
| ICC                           | 0.62          | 0.96         |
| S_central                     |               |              |
| volume (1e3 mm <sup>3</sup> ) | 3.79 ± 0.39   | 3.97 ± 0.34* |
| CoV                           | 7.41 ± 7.02   | 1.29 ± 0.99* |
| ICC                           | 0.45          | 0.96         |
| S_cingul-Marginalis           |               |              |
| volume (1e3 mm <sup>3</sup> ) | 1.98 ± 0.38   | 2.17 ± 0.27* |
| CoV                           | 8.61 ± 8.25   | 2.39 ± 0.97* |

|                               |               |              |
|-------------------------------|---------------|--------------|
| ICC                           | 0.76          | 0.96         |
| S_circular_insula_ant         |               |              |
| volume (1e3 mm <sup>3</sup> ) | 1.01 ± 0.15   | 1.04 ± 0.13  |
| CoV                           | 8.62 ± 6.50   | 3.50 ± 2.92  |
| ICC                           | 0.63          | 0.88         |
| S_circular_insula_inf         |               |              |
| volume (1e3 mm <sup>3</sup> ) | 2.07 ± 0.23   | 2.19 ± 0.22* |
| CoV                           | 6.96 ± 5.01   | 3.40 ± 1.99  |
| ICC                           | 0.60          | 0.85         |
| S_circular_insula_sup         |               |              |
| volume (1e3 mm <sup>3</sup> ) | 2.44 ± 0.32   | 2.50 ± 0.32  |
| CoV                           | 5.95 ± 6.22   | 4.18 ± 2.56  |
| ICC                           | 0.66          | 0.86         |
| S_collat_transv_ant           |               |              |
| volume (1e3 mm <sup>3</sup> ) | 1.81 ± 0.34   | 2.01 ± 0.31* |
| CoV                           | 11.15 ± 11.45 | 4.04 ± 2.15  |
| ICC                           | 0.59          | 0.90         |
| S_collat_transv_post          |               |              |
| volume (1e3 mm <sup>3</sup> ) | 0.68 ± 0.15   | 0.75 ± 0.09* |
| CoV                           | 11.71 ± 13.88 | 5.25 ± 2.51  |
| ICC                           | 0.68          | 0.81         |
| S_front_inf                   |               |              |
| volume (1e3 mm <sup>3</sup> ) | 3.61 ± 0.53   | 3.80 ± 0.43* |
| CoV                           | 9.37 ± 10.21  | 2.97 ± 3.91* |
| ICC                           | 0.55          | 0.83         |
| S_front_middle                |               |              |
| volume (1e3 mm <sup>3</sup> ) | 3.41 ± 0.82   | 3.67 ± 0.61* |
| CoV                           | 12.62 ± 9.16  | 7.20 ± 4.69  |
| ICC                           | 0.71          | 0.77         |
| S_front_sup                   |               |              |

|                               |               |              |
|-------------------------------|---------------|--------------|
| volume (1e3 mm <sup>3</sup> ) | 4.93 ± 1.04   | 5.31 ± 0.85* |
| CoV                           | 7.48 ± 5.94   | 3.27 ± 2.17  |
| ICC                           | 0.86          | 0.94         |
| S_interm_prim-Jensen          |               |              |
| volume (1e3 mm <sup>3</sup> ) | 0.67 ± 0.21   | 0.76 ± 0.19* |
| CoV                           | 16.20 ± 16.49 | 5.66 ± 3.40  |
| ICC                           | 0.72          | 0.93         |
| S_intrapariet_and_P_trans     |               |              |
| volume (1e3 mm <sup>3</sup> ) | 5.18 ± 0.94   | 5.56 ± 0.71* |
| CoV                           | 8.15 ± 6.15   | 2.15 ± 1.31* |
| ICC                           | 0.76          | 0.96         |
| S_oc_middle_and_Lunatus       |               |              |
| volume (1e3 mm <sup>3</sup> ) | 1.50 ± 0.29   | 1.59 ± 0.25* |
| CoV                           | 8.63 ± 6.88   | 3.25 ± 1.71* |
| ICC                           | 0.78          | 0.94         |
| S_oc_sup_and_transversal      |               |              |
| volume (1e3 mm <sup>3</sup> ) | 2.09 ± 0.48   | 2.28 ± 0.49* |
| CoV                           | 9.34 ± 6.52   | 2.26 ± 1.77* |
| ICC                           | 0.80          | 0.98         |
| S_occipital_ant               |               |              |
| volume (1e3 mm <sup>3</sup> ) | 1.28 ± 0.19   | 1.34 ± 0.18  |
| CoV                           | 13.67 ± 11.05 | 4.14 ± 3.43* |
| ICC                           | 0.31          | 0.85         |
| S_oc-temp_lat                 |               |              |
| volume (1e3 mm <sup>3</sup> ) | 1.78 ± 0.31   | 1.93 ± 0.28* |
| CoV                           | 10.61 ± 11.58 | 4.30 ± 2.95  |
| ICC                           | 0.61          | 0.87         |
| S_oc-temp_med_and_Lingual     |               |              |
| volume (1e3 mm <sup>3</sup> ) | 3.27 ± 0.67   | 3.67 ± 0.38* |
| CoV                           | 11.16 ± 15.14 | 2.15 ± 1.29  |
| ICC                           | 0.65          | 0.94         |



|                               |               |              |
|-------------------------------|---------------|--------------|
| S_orbital_lateral             |               |              |
| volume (1e3 mm <sup>3</sup> ) | 0.79 ± 0.17   | 0.81 ± 0.09  |
| CoV                           | 14.57 ± 13.27 | 9.88 ± 7.48  |
| ICC                           | 0.57          | 0.32         |
| S_orbital_med-olfact          |               |              |
| volume (1e3 mm <sup>3</sup> ) | 1.03 ± 0.18   | 1.16 ± 0.15* |
| CoV                           | 15.13 ± 13.02 | 5.60 ± 2.13  |
| ICC                           | 0.39          | 0.78         |
| S_orbital-H_Shaped            |               |              |
| volume (1e3 mm <sup>3</sup> ) | 2.82 ± 0.54   | 3.18 ± 0.30* |
| CoV                           | 12.29 ± 13.58 | 2.80 ± 2.28* |
| ICC                           | 0.58          | 0.88         |
| S_parieto_occipital           |               |              |
| volume (1e3 mm <sup>3</sup> ) | 3.75 ± 0.63   | 4.14 ± 0.62* |
| CoV                           | 9.56 ± 8.85   | 1.91 ± 1.14  |
| ICC                           | 0.62          | 0.98         |
| S_pericallosal                |               |              |
| volume (1e3 mm <sup>3</sup> ) | 1.47 ± 0.18   | 1.53 ± 0.16  |
| CoV                           | 6.71 ± 9.28   | 3.21 ± 1.67  |
| ICC                           | 0.49          | 0.89         |
| S_postcentral                 |               |              |
| volume (1e3 mm <sup>3</sup> ) | 3.93 ± 0.89   | 4.36 ± 0.82* |
| CoV                           | 10.64 ± 8.70  | 1.98 ± 1.03* |
| ICC                           | 0.72          | 0.99         |
| S_precentral-inf-part         |               |              |
| volume (1e3 mm <sup>3</sup> ) | 3.10 ± 0.58   | 3.37 ± 0.37* |
| CoV                           | 8.49 ± 8.67   | 2.29 ± 1.40* |
| ICC                           | 0.76          | 0.94         |
| S_precentral-sup-part         |               |              |
| volume (1e3 mm <sup>3</sup> ) | 2.06 ± 0.40   | 2.19 ± 0.36* |
| CoV                           | 13.81 ± 13.42 | 4.00 ± 2.32  |
| ICC                           | 0.47          | 0.93         |

|                               |               |               |
|-------------------------------|---------------|---------------|
| S_suborbital                  |               |               |
| volume (1e3 mm <sup>3</sup> ) | 1.03 ± 0.29   | 0.99 ± 0.22   |
| CoV                           | 14.22 ± 11.92 | 7.85 ± 4.86   |
| ICC                           | 0.66          | 0.85          |
| <br>                          |               |               |
| S_subparietal                 |               |               |
| volume (1e3 mm <sup>3</sup> ) | 1.94 ± 0.45   | 2.05 ± 0.39*  |
| CoV                           | 11.44 ± 9.42  | 3.89 ± 1.94*  |
| ICC                           | 0.73          | 0.95          |
| <br>                          |               |               |
| S_temporal_inf                |               |               |
| volume (1e3 mm <sup>3</sup> ) | 2.55 ± 0.50   | 2.84 ± 0.32*  |
| CoV                           | 12.86 ± 13.84 | 3.83 ± 2.18   |
| ICC                           | 0.57          | 0.86          |
| <br>                          |               |               |
| S_temporal_sup                |               |               |
| volume (1e3 mm <sup>3</sup> ) | 10.78 ± 1.67  | 11.88 ± 1.28* |
| CoV                           | 8.82 ± 9.14   | 1.50 ± 0.41*  |
| ICC                           | 0.60          | 0.98          |
| <br>                          |               |               |
| S_temporal_transverse         |               |               |
| volume (1e3 mm <sup>3</sup> ) | 0.53 ± 0.10   | 0.57 ± 0.09*  |
| CoV                           | 11.54 ± 8.69  | 6.33 ± 2.16*  |
| ICC                           | 0.69          | 0.85          |
