# Supplementary material for: FreeSurfer based cortical mapping and T1-relaxometry with MPnRAGE: Test-retest reliability with and without retrospective motion correction
Source: PubMed Central journal article supplement — Neuroimage. Author manuscript; Available in PMC 2021 Nov 15. (PMC8525331; doi:10.1016/j.neuroimage.2021.118447), 2021-08-03
Supplement: NIHMS1741393-supplement-9.pdf [file NIHMS1741393-supplement-9.pdf]

Supplementary Table 8: Volume measurements for regions of DK atlas. Coefficients of variation (CoV) are given as % x 100. Statistically significant differences (at  $p < 0.05$  after FDR correction) of the parameter values and associated CoVs between non-motion corrected and motion corrected datasets are given with \*.

|                               |               |               |
|-------------------------------|---------------|---------------|
| bankssts                      |               |               |
| volume (1e3 mm <sup>3</sup> ) | 2.57 ± 0.38   | 2.86 ± 0.24*  |
| CoV                           | 8.54 ± 9.40   | 2.65 ± 1.66   |
| ICC                           | 0.53          | 0.87          |
| caudalanteriorcingulate       |               |               |
| volume (1e3 mm <sup>3</sup> ) | 2.01 ± 0.44   | 2.30 ± 0.35*  |
| CoV                           | 12.35 ± 14.94 | 2.44 ± 2.81*  |
| ICC                           | 0.62          | 0.95          |
| caudalmiddlefrontal           |               |               |
| volume (1e3 mm <sup>3</sup> ) | 7.74 ± 2.07   | 8.42 ± 1.82*  |
| CoV                           | 9.18 ± 8.52   | 2.03 ± 1.16*  |
| ICC                           | 0.86          | 0.99          |
| cuneus                        |               |               |
| volume (1e3 mm <sup>3</sup> ) | 4.28 ± 0.58   | 4.43 ± 0.55*  |
| CoV                           | 5.49 ± 5.97   | 1.45 ± 0.77*  |
| ICC                           | 0.74          | 0.98          |
| entorhinal                    |               |               |
| volume (1e3 mm <sup>3</sup> ) | 2.06 ± 0.32   | 2.13 ± 0.30   |
| CoV                           | 9.78 ± 8.75   | 4.24 ± 2.78   |
| ICC                           | 0.62          | 0.85          |
| fusiform                      |               |               |
| volume (1e3 mm <sup>3</sup> ) | 10.54 ± 1.61  | 11.40 ± 1.36* |
| CoV                           | 8.10 ± 13.98  | 1.43 ± 0.92*  |
| ICC                           | 0.55          | 0.98          |
| inferiorparietal              |               |               |
| volume (1e3 mm <sup>3</sup> ) | 17.00 ± 2.55  | 18.42 ± 2.24* |
| CoV                           | 6.62 ± 6.78   | 0.90 ± 0.35*  |
| ICC                           | 0.72          | 0.99          |

|                               |              |               |
|-------------------------------|--------------|---------------|
| inferiortemporal              |              |               |
| volume (1e3 mm <sup>3</sup> ) | 12.49 ± 2.23 | 13.84 ± 1.35* |
| CoV                           | 9.73 ± 11.12 | 1.65 ± 1.37*  |
| ICC                           | 0.65         | 0.95          |
| isthmuscingulate              |              |               |
| volume (1e3 mm <sup>3</sup> ) | 3.08 ± 0.33  | 3.19 ± 0.23*  |
| CoV                           | 5.39 ± 6.32  | 2.01 ± 1.07*  |
| ICC                           | 0.66         | 0.90          |
| lateraloccipital              |              |               |
| volume (1e3 mm <sup>3</sup> ) | 15.90 ± 2.33 | 16.34 ± 1.93* |
| CoV                           | 4.12 ± 5.11  | 1.17 ± 0.71*  |
| ICC                           | 0.86         | 0.99          |
| lateralorbitofrontal          |              |               |
| volume (1e3 mm <sup>3</sup> ) | 8.75 ± 1.27  | 9.70 ± 0.71*  |
| CoV                           | 9.86 ± 10.76 | 1.79 ± 1.15*  |
| ICC                           | 0.49         | 0.92          |
| lingual                       |              |               |
| volume (1e3 mm <sup>3</sup> ) | 8.37 ± 1.24  | 8.72 ± 0.92   |
| CoV                           | 5.29 ± 11.98 | 1.52 ± 0.71   |
| ICC                           | 0.70         | 0.97          |
| medialorbitofrontal           |              |               |
| volume (1e3 mm <sup>3</sup> ) | 6.79 ± 1.07  | 7.20 ± 0.78   |
| CoV                           | 8.04 ± 10.49 | 2.24 ± 1.41   |
| ICC                           | 0.62         | 0.94          |
| middletemporal                |              |               |
| volume (1e3 mm <sup>3</sup> ) | 13.90 ± 2.44 | 15.30 ± 1.62* |
| CoV                           | 8.70 ± 9.14  | 1.26 ± 0.65*  |
| ICC                           | 0.70         | 0.98          |
| parahippocampal               |              |               |
| volume (1e3 mm <sup>3</sup> ) | 2.11 ± 0.25  | 2.24 ± 0.15   |
| CoV                           | 9.16 ± 14.01 | 1.90 ± 0.87*  |
| ICC                           | 0.33         | 0.90          |

|                               |               |               |
|-------------------------------|---------------|---------------|
| paracentral                   |               |               |
| volume (1e3 mm <sup>3</sup> ) | 4.70 ± 0.53   | 4.98 ± 0.43*  |
| CoV                           | 5.60 ± 4.73   | 1.63 ± 0.94*  |
| ICC                           | 0.70          | 0.95          |
|                               |               |               |
| parsopercularis               |               |               |
| volume (1e3 mm <sup>3</sup> ) | 4.94 ± 0.73   | 5.27 ± 0.69*  |
| CoV                           | 5.48 ± 6.63   | 1.57 ± 0.78*  |
| ICC                           | 0.76          | 0.98          |
|                               |               |               |
| parsorbitalis                 |               |               |
| volume (1e3 mm <sup>3</sup> ) | 3.31 ± 0.26   | 3.54 ± 0.28*  |
| CoV                           | 7.46 ± 6.40   | 2.12 ± 0.90*  |
| ICC                           | 0.23          | 0.92          |
|                               |               |               |
| parstriangularis              |               |               |
| volume (1e3 mm <sup>3</sup> ) | 5.03 ± 0.62   | 5.16 ± 0.59   |
| CoV                           | 7.49 ± 10.00  | 0.98 ± 0.40*  |
| ICC                           | 0.45          | 0.99          |
|                               |               |               |
| pericalcarine                 |               |               |
| volume (1e3 mm <sup>3</sup> ) | 2.72 ± 0.31   | 2.75 ± 0.29*  |
| CoV                           | 6.77 ± 5.49   | 2.79 ± 1.56*  |
| ICC                           | 0.57          | 0.90          |
|                               |               |               |
| postcentral                   |               |               |
| volume (1e3 mm <sup>3</sup> ) | 11.34 ± 1.95  | 12.07 ± 1.90* |
| CoV                           | 5.73 ± 5.81   | 1.28 ± 0.67*  |
| ICC                           | 0.82          | 0.99          |
|                               |               |               |
| posteriorcingulate            |               |               |
| volume (1e3 mm <sup>3</sup> ) | 3.73 ± 0.76   | 4.19 ± 0.50*  |
| CoV                           | 10.36 ± 10.35 | 1.66 ± 1.81*  |
| ICC                           | 0.71          | 0.96          |
|                               |               |               |
| precentral                    |               |               |
| volume (1e3 mm <sup>3</sup> ) | 15.23 ± 1.90  | 16.35 ± 1.47* |

|                               |               |               |
|-------------------------------|---------------|---------------|
| CoV                           | 7.57 ± 7.18   | 1.16 ± 0.82*  |
| ICC                           | 0.57          | 0.97          |
| precuneus                     |               |               |
| volume (1e3 mm <sup>3</sup> ) | 12.54 ± 2.06  | 13.42 ± 1.57* |
| CoV                           | 6.95 ± 6.50   | 0.96 ± 0.66*  |
| ICC                           | 0.77          | 0.99          |
| rostralanteriorcingulate      |               |               |
| volume (1e3 mm <sup>3</sup> ) | 2.24 ± 0.60   | 2.62 ± 0.40*  |
| CoV                           | 18.35 ± 18.92 | 3.87 ± 4.09*  |
| ICC                           | 0.57          | 0.90          |
| rostralmiddlefrontal          |               |               |
| volume (1e3 mm <sup>3</sup> ) | 19.62 ± 3.32  | 20.82 ± 2.16* |
| CoV                           | 7.84 ± 10.41  | 1.27 ± 0.79*  |
| ICC                           | 0.69          | 0.98          |
| superiorfrontal               |               |               |
| volume (1e3 mm <sup>3</sup> ) | 26.08 ± 4.20  | 28.22 ± 2.88* |
| CoV                           | 7.61 ± 8.46   | 1.04 ± 0.54*  |
| ICC                           | 0.71          | 0.99          |
| superiorparietal              |               |               |
| volume (1e3 mm <sup>3</sup> ) | 17.04 ± 2.33  | 18.10 ± 1.81* |
| CoV                           | 7.25 ± 5.90   | 0.87 ± 0.63*  |
| ICC                           | 0.67          | 0.99          |
| superiortemporal              |               |               |
| volume (1e3 mm <sup>3</sup> ) | 13.36 ± 2.02  | 14.65 ± 1.16* |
| CoV                           | 8.64 ± 9.74   | 1.32 ± 0.64*  |
| ICC                           | 0.61          | 0.97          |
| supramarginal                 |               |               |
| volume (1e3 mm <sup>3</sup> ) | 12.94 ± 1.95  | 13.79 ± 1.48* |
| CoV                           | 5.43 ± 4.97   | 1.38 ± 0.46*  |
| ICC                           | 0.82          | 0.98          |

|                               |              |              |
|-------------------------------|--------------|--------------|
| frontalpole                   |              |              |
| volume (1e3 mm <sup>3</sup> ) | 1.62 ± 0.21  | 1.58 ± 0.14  |
| CoV                           | 11.16 ± 9.28 | 4.34 ± 3.82* |
| ICC                           | 0.26         | 0.62         |
| temporalpole                  |              |              |
| volume (1e3 mm <sup>3</sup> ) | 2.74 ± 0.26  | 2.84 ± 0.22  |
| CoV                           | 6.66 ± 6.27  | 2.69 ± 1.46  |
| ICC                           | 0.47         | 0.86         |
| transversetemporal            |              |              |
| volume (1e3 mm <sup>3</sup> ) | 1.20 ± 0.20  | 1.29 ± 0.18* |
| CoV                           | 8.77 ± 11.27 | 2.15 ± 1.12  |
| ICC                           | 0.56         | 0.97         |
| insula                        |              |              |
| volume (1e3 mm <sup>3</sup> ) | 7.48 ± 0.92  | 7.92 ± 0.69* |
| CoV                           | 5.90 ± 6.64  | 2.81 ± 2.02  |
| ICC                           | 0.68         | 0.83         |
