# Supplementary material for: FreeSurfer based cortical mapping and T1-relaxometry with MPnRAGE: Test-retest reliability with and without retrospective motion correction
Source: PubMed Central journal article supplement — Neuroimage. Author manuscript; Available in PMC 2021 Nov 15. (PMC8525331; doi:10.1016/j.neuroimage.2021.118447), 2021-08-03
Supplement: NIHMS1741393-supplement-10.pdf [file NIHMS1741393-supplement-10.pdf]

Supplementary Table 9: Measurement errors (% x 100) for regions of Destrieux atlas.

|                      |          |  |      |
|----------------------|----------|--|------|
| G_and_S_frontomargin |          |  |      |
| R1                   | (roi)    |  | 0.89 |
| thickness            | (roi)    |  | 2.03 |
| s. area              | (roi)    |  | 3.17 |
| volume               | (roi)    |  | 3.42 |
|                      |          |  |      |
| R1                   | (vertex) |  | 1.82 |
| thickness            | (vertex) |  | 3.68 |

|                       |          |  |      |
|-----------------------|----------|--|------|
| G_and_S_occipital_inf |          |  |      |
| R1                    | (roi)    |  | 0.76 |
| thickness             | (roi)    |  | 0.88 |
| s. area               | (roi)    |  | 2.83 |
| volume                | (roi)    |  | 3.26 |
|                       |          |  |      |
| R1                    | (vertex) |  | 1.43 |
| thickness             | (vertex) |  | 2.25 |

|                     |          |  |      |
|---------------------|----------|--|------|
| G_and_S_paracentral |          |  |      |
| R1                  | (roi)    |  | 0.87 |
| thickness           | (roi)    |  | 1.33 |
| s. area             | (roi)    |  | 2.24 |
| volume              | (roi)    |  | 2.34 |
|                     |          |  |      |
| R1                  | (vertex) |  | 1.58 |
| thickness           | (vertex) |  | 2.57 |

|                    |          |  |      |
|--------------------|----------|--|------|
| G_and_S_subcentral |          |  |      |
| R1                 | (roi)    |  | 0.83 |
| thickness          | (roi)    |  | 1.02 |
| s. area            | (roi)    |  | 2.42 |
| volume             | (roi)    |  | 2.81 |
|                    |          |  |      |
| R1                 | (vertex) |  | 1.79 |
| thickness          | (vertex) |  | 2.56 |

|                          |          |  |      |
|--------------------------|----------|--|------|
| G_and_S_transv_frontopol |          |  |      |
| R1                       | (roi)    |  | 0.90 |
| thickness                | (roi)    |  | 2.22 |
| s. area                  | (roi)    |  | 2.73 |
| volume                   | (roi)    |  | 3.46 |
|                          |          |  |      |
| R1                       | (vertex) |  | 1.71 |
| thickness                | (vertex) |  | 3.48 |

G\_and\_S\_cingul-Ant

|                         |          |      |
|-------------------------|----------|------|
| R1                      | (roi)    | 0.98 |
| thickness               | (roi)    | 1.71 |
| s. area                 | (roi)    | 2.08 |
| volume                  | (roi)    | 3.10 |
| R1                      | (vertex) | 2.16 |
| thickness               | (vertex) | 3.88 |
| G_and_S_cingul-Mid-Ant  |          |      |
| R1                      | (roi)    | 1.08 |
| thickness               | (roi)    | 2.22 |
| s. area                 | (roi)    | 2.59 |
| volume                  | (roi)    | 2.95 |
| R1                      | (vertex) | 2.16 |
| thickness               | (vertex) | 3.71 |
| G_and_S_cingul-Mid-Post |          |      |
| R1                      | (roi)    | 1.10 |
| thickness               | (roi)    | 1.68 |
| s. area                 | (roi)    | 1.98 |
| volume                  | (roi)    | 2.69 |
| R1                      | (vertex) | 2.17 |
| thickness               | (vertex) | 3.60 |
| G_cingul-Post-dorsal    |          |      |
| R1                      | (roi)    | 0.87 |
| thickness               | (roi)    | 1.15 |
| s. area                 | (roi)    | 3.70 |
| volume                  | (roi)    | 3.41 |
| R1                      | (vertex) | 1.97 |
| thickness               | (vertex) | 3.22 |
| G_cingul-Post-ventral   |          |      |
| R1                      | (roi)    | 1.38 |
| thickness               | (roi)    | 2.21 |
| s. area                 | (roi)    | 2.89 |
| volume                  | (roi)    | 4.54 |
| R1                      | (vertex) | 3.29 |
| thickness               | (vertex) | 4.61 |
| G_cuneus                |          |      |
| R1                      | (roi)    | 0.76 |
| thickness               | (roi)    | 1.51 |
| s. area                 | (roi)    | 2.10 |
| volume                  | (roi)    | 2.35 |

|                       |          |      |
|-----------------------|----------|------|
| R1                    | (vertex) | 1.32 |
| thickness             | (vertex) | 3.34 |
| G_front_inf-Opercular |          |      |
| R1                    | (roi)    | 0.83 |
| thickness             | (roi)    | 1.15 |
| s. area               | (roi)    | 2.68 |
| volume                | (roi)    | 2.43 |
| R1                    | (vertex) | 1.73 |
| thickness             | (vertex) | 2.44 |
| G_front_inf-Orbital   |          |      |
| R1                    | (roi)    | 1.33 |
| thickness             | (roi)    | 1.35 |
| s. area               | (roi)    | 6.03 |
| volume                | (roi)    | 5.82 |
| R1                    | (vertex) | 2.03 |
| thickness             | (vertex) | 2.49 |
| G_front_inf-Triangul  |          |      |
| R1                    | (roi)    | 0.93 |
| thickness             | (roi)    | 1.12 |
| s. area               | (roi)    | 3.32 |
| volume                | (roi)    | 2.87 |
| R1                    | (vertex) | 1.65 |
| thickness             | (vertex) | 2.34 |
| G_front_middle        |          |      |
| R1                    | (roi)    | 0.95 |
| thickness             | (roi)    | 1.12 |
| s. area               | (roi)    | 3.50 |
| volume                | (roi)    | 4.07 |
| R1                    | (vertex) | 1.75 |
| thickness             | (vertex) | 2.78 |
| G_front_sup           |          |      |
| R1                    | (roi)    | 1.29 |
| thickness             | (roi)    | 1.12 |
| s. area               | (roi)    | 1.56 |
| volume                | (roi)    | 1.37 |
| R1                    | (vertex) | 2.06 |
| thickness             | (vertex) | 3.02 |

|                         |          |  |      |
|-------------------------|----------|--|------|
| G_Ins_lg_and_S_cent_ins |          |  |      |
| R1                      | (roi)    |  | 1.26 |
| thickness               | (roi)    |  | 1.22 |
| s. area                 | (roi)    |  | 6.83 |
| volume                  | (roi)    |  | 6.18 |
|                         |          |  |      |
| R1                      | (vertex) |  | 2.70 |
| thickness               | (vertex) |  | 4.85 |

|                 |          |  |      |
|-----------------|----------|--|------|
| G_insular_short |          |  |      |
| R1              | (roi)    |  | 1.25 |
| thickness       | (roi)    |  | 2.33 |
| s. area         | (roi)    |  | 7.44 |
| volume          | (roi)    |  | 6.24 |
|                 |          |  |      |
| R1              | (vertex) |  | 2.55 |
| thickness       | (vertex) |  | 4.96 |

|                    |          |  |      |
|--------------------|----------|--|------|
| G_occipital_middle |          |  |      |
| R1                 | (roi)    |  | 0.52 |
| thickness          | (roi)    |  | 0.72 |
| s. area            | (roi)    |  | 1.93 |
| volume             | (roi)    |  | 1.38 |
|                    |          |  |      |
| R1                 | (vertex) |  | 1.13 |
| thickness          | (vertex) |  | 2.06 |

|                 |          |  |      |
|-----------------|----------|--|------|
| G_occipital_sup |          |  |      |
| R1              | (roi)    |  | 0.94 |
| thickness       | (roi)    |  | 0.84 |
| s. area         | (roi)    |  | 2.40 |
| volume          | (roi)    |  | 2.21 |
|                 |          |  |      |
| R1              | (vertex) |  | 1.28 |
| thickness       | (vertex) |  | 2.07 |

|                       |          |  |      |
|-----------------------|----------|--|------|
| G_oc-temp_lat-fusifor |          |  |      |
| R1                    | (roi)    |  | 0.73 |
| thickness             | (roi)    |  | 1.00 |
| s. area               | (roi)    |  | 2.44 |
| volume                | (roi)    |  | 3.19 |
|                       |          |  |      |
| R1                    | (vertex) |  | 1.77 |
| thickness             | (vertex) |  | 2.65 |

|                       |       |  |      |
|-----------------------|-------|--|------|
| G_oc-temp_med-Lingual |       |  |      |
| R1                    | (roi) |  | 0.78 |
| thickness             | (roi) |  | 1.88 |

|                       |          |      |
|-----------------------|----------|------|
| s. area               | (roi)    | 1.79 |
| volume                | (roi)    | 2.00 |
| R1                    | (vertex) | 1.80 |
| thickness             | (vertex) | 4.24 |
| G_oc-temp_med-Parahip |          |      |
| R1                    | (roi)    | 2.67 |
| thickness             | (roi)    | 1.68 |
| s. area               | (roi)    | 4.78 |
| volume                | (roi)    | 4.75 |
| R1                    | (vertex) | 9.68 |
| thickness             | (vertex) | 6.43 |
| G_orbital             |          |      |
| R1                    | (roi)    | 1.15 |
| thickness             | (roi)    | 1.27 |
| s. area               | (roi)    | 1.76 |
| volume                | (roi)    | 1.99 |
| R1                    | (vertex) | 2.33 |
| thickness             | (vertex) | 3.76 |
| G_pariet_inf-Angular  |          |      |
| R1                    | (roi)    | 0.76 |
| thickness             | (roi)    | 0.84 |
| s. area               | (roi)    | 2.49 |
| volume                | (roi)    | 2.49 |
| R1                    | (vertex) | 1.31 |
| thickness             | (vertex) | 2.44 |
| G_pariet_inf-Supramar |          |      |
| R1                    | (roi)    | 0.88 |
| thickness             | (roi)    | 0.61 |
| s. area               | (roi)    | 1.99 |
| volume                | (roi)    | 1.84 |
| R1                    | (vertex) | 1.53 |
| thickness             | (vertex) | 2.70 |
| G_parietal_sup        |          |      |
| R1                    | (roi)    | 0.73 |
| thickness             | (roi)    | 0.92 |
| s. area               | (roi)    | 2.21 |
| volume                | (roi)    | 1.98 |
| R1                    | (vertex) | 1.27 |

|                       |          |       |
|-----------------------|----------|-------|
| thickness             | (vertex) | 2.44  |
| G_postcentral         |          |       |
| R1                    | (roi)    | 1.14  |
| thickness             | (roi)    | 1.42  |
| s. area               | (roi)    | 1.56  |
| volume                | (roi)    | 2.25  |
| R1                    | (vertex) | 1.91  |
| thickness             | (vertex) | 2.83  |
| G_precentral          |          |       |
| R1                    | (roi)    | 0.89  |
| thickness             | (roi)    | 1.42  |
| s. area               | (roi)    | 1.78  |
| volume                | (roi)    | 1.88  |
| R1                    | (vertex) | 1.73  |
| thickness             | (vertex) | 2.46  |
| G_precuneus           |          |       |
| R1                    | (roi)    | 0.75  |
| thickness             | (roi)    | 0.77  |
| s. area               | (roi)    | 1.90  |
| volume                | (roi)    | 2.30  |
| R1                    | (vertex) | 1.43  |
| thickness             | (vertex) | 2.84  |
| G_rectus              |          |       |
| R1                    | (roi)    | 2.19  |
| thickness             | (roi)    | 1.41  |
| s. area               | (roi)    | 3.93  |
| volume                | (roi)    | 4.05  |
| R1                    | (vertex) | 4.11  |
| thickness             | (vertex) | 5.29  |
| G_subcallosal         |          |       |
| R1                    | (roi)    | 6.36  |
| thickness             | (roi)    | 5.40  |
| s. area               | (roi)    | 34.31 |
| volume                | (roi)    | 27.13 |
| R1                    | (vertex) | 10.04 |
| thickness             | (vertex) | 8.29  |
| G_temp_sup-G_T_transv |          |       |

|                       |          |      |
|-----------------------|----------|------|
| R1                    | (roi)    | 0.90 |
| thickness             | (roi)    | 1.41 |
| s. area               | (roi)    | 3.38 |
| volume                | (roi)    | 4.19 |
| R1                    | (vertex) | 1.65 |
| thickness             | (vertex) | 2.41 |
| G_temp_sup-Lateral    |          |      |
| R1                    | (roi)    | 0.80 |
| thickness             | (roi)    | 0.83 |
| s. area               | (roi)    | 1.58 |
| volume                | (roi)    | 1.87 |
| R1                    | (vertex) | 1.59 |
| thickness             | (vertex) | 2.30 |
| G_temp_sup-Plan_polar |          |      |
| R1                    | (roi)    | 1.86 |
| thickness             | (roi)    | 2.01 |
| s. area               | (roi)    | 5.09 |
| volume                | (roi)    | 4.16 |
| R1                    | (vertex) | 4.09 |
| thickness             | (vertex) | 4.71 |
| G_temp_sup-Plan_tempo |          |      |
| R1                    | (roi)    | 1.05 |
| thickness             | (roi)    | 1.37 |
| s. area               | (roi)    | 3.43 |
| volume                | (roi)    | 3.97 |
| R1                    | (vertex) | 1.61 |
| thickness             | (vertex) | 2.58 |
| G_temporal_inf        |          |      |
| R1                    | (roi)    | 0.91 |
| thickness             | (roi)    | 1.21 |
| s. area               | (roi)    | 1.81 |
| volume                | (roi)    | 2.56 |
| R1                    | (vertex) | 1.84 |
| thickness             | (vertex) | 3.09 |
| G_temporal_middle     |          |      |
| R1                    | (roi)    | 0.70 |
| thickness             | (roi)    | 0.96 |
| s. area               | (roi)    | 1.89 |
| volume                | (roi)    | 1.53 |

|                      |          |      |
|----------------------|----------|------|
| R1                   | (vertex) | 1.67 |
| thickness            | (vertex) | 2.75 |
| Lat_Fis-ant-Horizont |          |      |
| R1                   | (roi)    | 1.25 |
| thickness            | (roi)    | 1.54 |
| s. area              | (roi)    | 4.19 |
| volume               | (roi)    | 5.38 |
| R1                   | (vertex) | 2.08 |
| thickness            | (vertex) | 2.72 |
| Lat_Fis-ant-Vertical |          |      |
| R1                   | (roi)    | 1.07 |
| thickness            | (roi)    | 1.49 |
| s. area              | (roi)    | 4.69 |
| volume               | (roi)    | 5.81 |
| R1                   | (vertex) | 1.82 |
| thickness            | (vertex) | 2.76 |
| Lat_Fis-post         |          |      |
| R1                   | (roi)    | 0.82 |
| thickness            | (roi)    | 1.25 |
| s. area              | (roi)    | 1.82 |
| volume               | (roi)    | 2.23 |
| R1                   | (vertex) | 1.97 |
| thickness            | (vertex) | 2.89 |
| Pole_occipital       |          |      |
| R1                   | (roi)    | 1.01 |
| thickness            | (roi)    | 1.71 |
| s. area              | (roi)    | 1.70 |
| volume               | (roi)    | 2.37 |
| R1                   | (vertex) | 1.68 |
| thickness            | (vertex) | 3.68 |
| Pole_temporal        |          |      |
| R1                   | (roi)    | 1.08 |
| thickness            | (roi)    | 1.43 |
| s. area              | (roi)    | 1.97 |
| volume               | (roi)    | 2.99 |
| R1                   | (vertex) | 2.40 |
| thickness            | (vertex) | 3.57 |



|             |          |  |      |
|-------------|----------|--|------|
| S_calcarine |          |  |      |
| R1          | (roi)    |  | 0.80 |
| thickness   | (roi)    |  | 1.53 |
| s. area     | (roi)    |  | 1.72 |
| volume      | (roi)    |  | 2.50 |
|             |          |  |      |
| R1          | (vertex) |  | 2.01 |
| thickness   | (vertex) |  | 3.95 |

|           |          |  |      |
|-----------|----------|--|------|
| S_central |          |  |      |
| R1        | (roi)    |  | 0.91 |
| thickness | (roi)    |  | 1.27 |
| s. area   | (roi)    |  | 0.85 |
| volume    | (roi)    |  | 1.60 |
|           |          |  |      |
| R1        | (vertex) |  | 1.82 |
| thickness | (vertex) |  | 2.80 |

|                     |          |  |      |
|---------------------|----------|--|------|
| S_cingul-Marginalis |          |  |      |
| R1                  | (roi)    |  | 0.99 |
| thickness           | (roi)    |  | 1.54 |
| s. area             | (roi)    |  | 2.16 |
| volume              | (roi)    |  | 2.51 |
|                     |          |  |      |
| R1                  | (vertex) |  | 1.83 |
| thickness           | (vertex) |  | 3.10 |

|                       |          |  |      |
|-----------------------|----------|--|------|
| S_circular_insula_ant |          |  |      |
| R1                    | (roi)    |  | 1.32 |
| thickness             | (roi)    |  | 1.48 |
| s. area               | (roi)    |  | 3.14 |
| volume                | (roi)    |  | 4.34 |
|                       |          |  |      |
| R1                    | (vertex) |  | 2.56 |
| thickness             | (vertex) |  | 3.31 |

|                       |          |  |      |
|-----------------------|----------|--|------|
| S_circular_insula_inf |          |  |      |
| R1                    | (roi)    |  | 0.98 |
| thickness             | (roi)    |  | 1.42 |
| s. area               | (roi)    |  | 2.12 |
| volume                | (roi)    |  | 3.95 |
|                       |          |  |      |
| R1                    | (vertex) |  | 2.62 |
| thickness             | (vertex) |  | 3.69 |

|                       |       |  |      |
|-----------------------|-------|--|------|
| S_circular_insula_sup |       |  |      |
| R1                    | (roi) |  | 1.08 |
| thickness             | (roi) |  | 1.59 |

|                      |          |      |
|----------------------|----------|------|
| s. area              | (roi)    | 2.48 |
| volume               | (roi)    | 4.76 |
| R1                   | (vertex) | 2.40 |
| thickness            | (vertex) | 3.85 |
| S_collat_transv_ant  |          |      |
| R1                   | (roi)    | 1.38 |
| thickness            | (roi)    | 1.38 |
| s. area              | (roi)    | 3.14 |
| volume               | (roi)    | 4.72 |
| R1                   | (vertex) | 2.60 |
| thickness            | (vertex) | 2.92 |
| S_collat_transv_post |          |      |
| R1                   | (roi)    | 0.89 |
| thickness            | (roi)    | 1.41 |
| s. area              | (roi)    | 4.28 |
| volume               | (roi)    | 5.54 |
| R1                   | (vertex) | 1.42 |
| thickness            | (vertex) | 2.22 |
| S_front_inf          |          |      |
| R1                   | (roi)    | 1.27 |
| thickness            | (roi)    | 1.55 |
| s. area              | (roi)    | 2.85 |
| volume               | (roi)    | 4.76 |
| R1                   | (vertex) | 1.98 |
| thickness            | (vertex) | 3.04 |
| S_front_middle       |          |      |
| R1                   | (roi)    | 1.33 |
| thickness            | (roi)    | 1.29 |
| s. area              | (roi)    | 4.96 |
| volume               | (roi)    | 8.28 |
| R1                   | (vertex) | 1.87 |
| thickness            | (vertex) | 3.07 |
| S_front_sup          |          |      |
| R1                   | (roi)    | 1.33 |
| thickness            | (roi)    | 2.00 |
| s. area              | (roi)    | 2.17 |
| volume               | (roi)    | 3.77 |
| R1                   | (vertex) | 2.05 |

|                           |          |      |
|---------------------------|----------|------|
| thickness                 | (vertex) | 3.27 |
| S_interm_prim-Jensen      |          |      |
| R1                        | (roi)    | 0.97 |
| thickness                 | (roi)    | 1.18 |
| s. area                   | (roi)    | 5.01 |
| volume                    | (roi)    | 6.53 |
| R1                        | (vertex) | 1.43 |
| thickness                 | (vertex) | 2.72 |
| S_intrapariet_and_P_trans |          |      |
| R1                        | (roi)    | 0.87 |
| thickness                 | (roi)    | 0.84 |
| s. area                   | (roi)    | 1.86 |
| volume                    | (roi)    | 2.35 |
| R1                        | (vertex) | 1.56 |
| thickness                 | (vertex) | 2.50 |
| S_oc_middle_and_Lunatus   |          |      |
| R1                        | (roi)    | 0.75 |
| thickness                 | (roi)    | 0.98 |
| s. area                   | (roi)    | 3.06 |
| volume                    | (roi)    | 3.70 |
| R1                        | (vertex) | 1.29 |
| thickness                 | (vertex) | 1.93 |
| S_oc_sup_and_transversal  |          |      |
| R1                        | (roi)    | 0.88 |
| thickness                 | (roi)    | 1.35 |
| s. area                   | (roi)    | 2.17 |
| volume                    | (roi)    | 2.79 |
| R1                        | (vertex) | 1.32 |
| thickness                 | (vertex) | 2.25 |
| S_occipital_ant           |          |      |
| R1                        | (roi)    | 0.69 |
| thickness                 | (roi)    | 1.09 |
| s. area                   | (roi)    | 3.62 |
| volume                    | (roi)    | 5.36 |
| R1                        | (vertex) | 1.28 |
| thickness                 | (vertex) | 2.07 |
| S_oc-temp_lat             |          |      |

|                           |          |       |
|---------------------------|----------|-------|
| R1                        | (roi)    | 1.02  |
| thickness                 | (roi)    | 1.18  |
| s. area                   | (roi)    | 3.90  |
| volume                    | (roi)    | 5.18  |
| R1                        | (vertex) | 1.92  |
| thickness                 | (vertex) | 2.71  |
| S_oc-temp_med_and_Lingual |          |       |
| R1                        | (roi)    | 1.00  |
| thickness                 | (roi)    | 1.31  |
| s. area                   | (roi)    | 2.28  |
| volume                    | (roi)    | 2.53  |
| R1                        | (vertex) | 2.24  |
| thickness                 | (vertex) | 2.94  |
| S_orbital_lateral         |          |       |
| R1                        | (roi)    | 1.39  |
| thickness                 | (roi)    | 1.68  |
| s. area                   | (roi)    | 8.12  |
| volume                    | (roi)    | 12.03 |
| R1                        | (vertex) | 1.98  |
| thickness                 | (vertex) | 2.75  |
| S_orbital_med-olfact      |          |       |
| R1                        | (roi)    | 2.19  |
| thickness                 | (roi)    | 1.96  |
| s. area                   | (roi)    | 6.17  |
| volume                    | (roi)    | 6.23  |
| R1                        | (vertex) | 3.56  |
| thickness                 | (vertex) | 5.42  |
| S_orbital-H_Shaped        |          |       |
| R1                        | (roi)    | 1.64  |
| thickness                 | (roi)    | 1.44  |
| s. area                   | (roi)    | 2.84  |
| volume                    | (roi)    | 3.32  |
| R1                        | (vertex) | 2.48  |
| thickness                 | (vertex) | 2.83  |
| S_parieto_occipital       |          |       |
| R1                        | (roi)    | 0.81  |
| thickness                 | (roi)    | 1.21  |
| s. area                   | (roi)    | 1.65  |
| volume                    | (roi)    | 2.07  |

|                       |          |      |
|-----------------------|----------|------|
| R1                    | (vertex) | 1.45 |
| thickness             | (vertex) | 2.43 |
| S_pericallosal        |          |      |
| R1                    | (roi)    | 1.27 |
| thickness             | (roi)    | 1.89 |
| s. area               | (roi)    | 1.99 |
| volume                | (roi)    | 3.62 |
| R1                    | (vertex) | 3.81 |
| thickness             | (vertex) | 6.35 |
| S_postcentral         |          |      |
| R1                    | (roi)    | 0.87 |
| thickness             | (roi)    | 1.25 |
| s. area               | (roi)    | 1.74 |
| volume                | (roi)    | 2.13 |
| R1                    | (vertex) | 1.66 |
| thickness             | (vertex) | 3.01 |
| S_precentral-inf-part |          |      |
| R1                    | (roi)    | 1.26 |
| thickness             | (roi)    | 1.73 |
| s. area               | (roi)    | 1.57 |
| volume                | (roi)    | 2.58 |
| R1                    | (vertex) | 1.97 |
| thickness             | (vertex) | 2.79 |
| S_precentral-sup-part |          |      |
| R1                    | (roi)    | 1.15 |
| thickness             | (roi)    | 2.59 |
| s. area               | (roi)    | 3.08 |
| volume                | (roi)    | 4.15 |
| R1                    | (vertex) | 1.88 |
| thickness             | (vertex) | 3.91 |
| S_suborbital          |          |      |
| R1                    | (roi)    | 1.40 |
| thickness             | (roi)    | 1.93 |
| s. area               | (roi)    | 6.89 |
| volume                | (roi)    | 8.78 |
| R1                    | (vertex) | 3.52 |
| thickness             | (vertex) | 4.88 |

|               |       |  |      |
|---------------|-------|--|------|
| S_subparietal |       |  |      |
| R1            | (roi) |  | 0.86 |
| thickness     | (roi) |  | 1.06 |
| s. area       | (roi) |  | 2.62 |
| volume        | (roi) |  | 4.17 |

|           |          |  |      |
|-----------|----------|--|------|
| R1        | (vertex) |  | 1.67 |
| thickness | (vertex) |  | 2.88 |

|                |       |  |      |
|----------------|-------|--|------|
| S_temporal_inf |       |  |      |
| R1             | (roi) |  | 0.58 |
| thickness      | (roi) |  | 1.00 |
| s. area        | (roi) |  | 3.39 |
| volume         | (roi) |  | 4.16 |

|           |          |  |      |
|-----------|----------|--|------|
| R1        | (vertex) |  | 1.48 |
| thickness | (vertex) |  | 2.51 |

|                |       |  |      |
|----------------|-------|--|------|
| S_temporal_sup |       |  |      |
| R1             | (roi) |  | 0.76 |
| thickness      | (roi) |  | 0.86 |
| s. area        | (roi) |  | 1.33 |
| volume         | (roi) |  | 1.61 |

|           |          |  |      |
|-----------|----------|--|------|
| R1        | (vertex) |  | 1.56 |
| thickness | (vertex) |  | 2.57 |

|                       |       |  |      |
|-----------------------|-------|--|------|
| S_temporal_transverse |       |  |      |
| R1                    | (roi) |  | 1.08 |
| thickness             | (roi) |  | 1.39 |
| s. area               | (roi) |  | 4.41 |
| volume                | (roi) |  | 6.27 |

|           |          |  |      |
|-----------|----------|--|------|
| R1        | (vertex) |  | 1.81 |
| thickness | (vertex) |  | 2.43 |
